# Supplementary material for: Is particulate organic carbon transported to the deep-ocean increasing with the growing ocean carbon sink
Source: Research Square preprint supplement (doi:10.21203/rs.3.rs-2381764/v1), 2023-01-16
Supplement: Supplementary file 1 [file db8794ea80e4ded41be74a38.xlsx]

## Sheet: Table S1
NO.	Station	Lat	Long	Year	Trap depth (m)	Trap mab. (m)	Water depth (m)	POC flux (mgC m-2d-1)	POC method	References	Comments
1	P2	-55.248	-41.265	2012	1500	1850	3350	29.58	sediment trap	Belcher et al. (2018)
1	P2	-55.248	-41.265	2013	1500	1850	3350	3.7933	sediment trap	Belcher et al. (2018)
2	1	-157.983	22.75	2017	100	4623	4723	34.8684	sediment trap	Dong et al. (2019)
3	2	-155.25	27.75	2017	100	5549	5649	8.4002	sediment trap	Dong et al. (2019)
4	3	-150.983	35.2667	2017	100	5479	5579	7.7895	sediment trap	Dong et al. (2019)
5	4	-148.267	41.75	2017	100	5015	5115	52.3718	sediment trap	Dong et al. (2019)
6	5	-149.65	49.8333	2017	100	4657	4757	32.7252	sediment trap	Dong et al. (2019)
7	GB	20.03	57.21	2015	40	208	248	153.508	sediment trap	Cisternas-Novoa et al. (2019)
8	LD	18.55	58.7	2015	40	420	460	201.929	sediment trap	Cisternas-Novoa et al. (2019)
9	47	23.55	35.1	2005	3538	15	3553	1.5	sediment trap	Karageorgis et al. (2018)
10	48	23.7333	35.1333	2005	995	972	1967	1.8	sediment trap	Karageorgis et al. (2018)
10	48	23.7333	35.1333	2005	1953	14	1967	2.1	sediment trap	Karageorgis et al. (2018)
11	49	23.9333	35.1833	2005	1215	16	1231	4.8	sediment trap	Karageorgis et al. (2018)
12	53	24.8833	34.8333	2005	1662	16	1678	1.8	sediment trap	Karageorgis et al. (2018)
13	53	24.879	34.8371	2005	705	973	1678	3.2	sediment trap	Karageorgis et al. (2018)
14	55	24.55	34.8667	2005	2680	15	2695	1.8	sediment trap	Karageorgis et al. (2018)
15	56	23.7333	35.05	2005	1285	16	1301	1.5	sediment trap	Karageorgis et al. (2018)
16	K2	160	47	2005-2006	4000	1198	5198	1.06	sediment trap	Lalande et al. (2014)
16	K2	160	47	2005-2006	4810	388	5198	4.2289	sediment trap	Lalande et al. (2014)
16	K2	160	47	2010-2012	60	5138	5198	52.75	sediment trap	Honda et al. (2015)
17	S1	145	30	2010-2012	60	5893	5953	74.15	sediment trap	Honda et al. (2015)
18	EW7	-160	49.5	2005	100	4805	4905	29	sediment trap	Kawakami et al. (2010)
19	K1	165	51	2005	100	4817	4917	44	sediment trap	Kawakami et al. (2010)
20	K2	160	47	2011	400	4798	5198	56.75	sediment trap	Kawakami et al. (2014)
21	S1	145	30	2011	400	5553	5953	35.75	sediment trap	Kawakami et al. (2014)
22	K2	160	47	2006	100	5098	5198	96.5	sediment trap	Kawakami et al. (2015)
23	-	68	9	2013	100	4449	4549	96	sediment trap	Subha Anand et al. (2018)
24	-	87	18	2014	100	2337	2437	8.4	sediment trap	Subha Anand et al. (2018)
25	P17	-157.983	74.15	2003	2200	1469	3669	28.8	sediment trap	Yu et al. (2010)
26	EHS5	-152.6	72.55	2004	30	217	247	115.754	sediment trap	Hung and Gong (2007)
27	APF	-170	-10.0833	1997	100	5073	5173	163.8	sediment trap	Buesseler et al. (2001)
27	APF	-170	-10.0833	1997	1000	4173	5173	3	sediment trap	Buesseler et al. (2001)
28	Atlantic	-6	72	1988-1992	500	2000	2500	5.2086	sediment trap	Kim et al. (2020)
28	Atlantic	-6	72	1988-1992	2000	500	2500	2.1	sediment trap	Kim et al. (2020)
29	Barents-Sea	19	73	1989-1990	372	100	472	2.64	sediment trap	Kim et al. (2020)
30	Japan Trench	141.98	34.17	1992	921	8010	8931	5.44	sediment trap	Kim et al. (2020)
30	Japan Trench	141.98	34.17	1992-1993	3423	5508	8931	2.16	sediment trap	Kim et al. (2020)
30	Japan Trench	141.98	34.17	1992	5429	3502	8931	3.16	sediment trap	Kim et al. (2020)
31	ArS	26.369	79.168	2016	120	148	268	306.655	sediment trap	Wiedmann et al. (2020)
32	AS	29.635	76.223	2016	110	180	290	266.42	sediment trap	Wiedmann et al. (2020)
33	ES	131.36	37.63	2011	500	1617	2117	28.3987	sediment trap	Kim et al. (2020)	lateral transport
33	ES	131.36	37.63	2012	500	1617	2117	18.8688	sediment trap	Kim et al. (2020)	lateral transport
33	ES	131.36	37.63	2013	500	1617	2117	17.7104	sediment trap	Kim et al. (2020)	lateral transport
33	ES	131.36	37.63	2014	500	1617	2117	41.778	sediment trap	Kim et al. (2020)	lateral transport
33	ES	131.36	37.63	2015	500	1617	2117	36.157	sediment trap	Kim et al. (2020)	lateral transport
33	ES	131.36	37.63	2016	500	1617	2117	23.2085	sediment trap	Kim et al. (2020)	lateral transport
33	ES	131.36	37.63	2017	500	1617	2117	5.4156	sediment trap	Kim et al. (2020)	lateral transport
33	ES	131.36	37.63	2011	2000	117	2117	21.7321	sediment trap	Kim et al. (2020)	lateral transport
33	ES	131.36	37.63	2012	2000	117	2117	15.2133	sediment trap	Kim et al. (2020)	lateral transport
33	ES	131.36	37.63	2013	2000	117	2117	27.6466	sediment trap	Kim et al. (2020)	lateral transport
33	ES	131.36	37.63	2016	2000	117	2117	31.5049	sediment trap	Kim et al. (2020)	lateral transport
34	A	0.5152	39.64	2010	477	30	507	41.2716	POM = 1.8 × POC	Isla et al. (2020)
35	B	0.2733	39.498	2010-2011	443	30	473	36.8098	POM = 1.8 × POC	Isla et al. (2020)
36	Cb	0.4943	39.4055	2010	1200	30	1230	26.7708	POM = 1.8 × POC	Isla et al. (2020)
36	Ct	0.4943	39.4055	2010	450	780	1230	27.8862	POM = 1.8 × POC	Isla et al. (2020)
37	Hardangerfjorden	5.9291	60.1077	2016	419	60	479	43.8356	sediment trap	Lalande et al. (2020)
38	Hardangerfjorden	5.9268	60.1255	2016	408	60	468	44.1096	sediment trap	Lalande et al. (2020)
39	Lurefjorden	5.1771	64.6818	2015-2016	332	52	384	51.2329	sediment trap	Lalande et al. (2020)	anthropogenic aquaculture
40	DYF1	7.8666	43.4166	1988	200	2105	2305	12.5238	sediment trap	Mas et al. (2020)
40	DYF13	7.8666	43.4166	1991	200	2105	2305	13.4478	sediment trap	Mas et al. (2020)
40	DYF13	7.8666	43.4166	1991	1000	1415	2415	11.9684	sediment trap	Mas et al. (2020)
40	DYF16	7.8666	43.4166	1993	200	2105	2305	5.7434	sediment trap	Mas et al. (2020)
40	DYF16	7.8666	43.4166	1993	1000	1415	2415	2.5127	sediment trap	Mas et al. (2020)
40	DYF17	7.8666	43.4166	1994	200	2105	2305	4.4471	sediment trap	Mas et al. (2020)
40	DYF17	7.8666	43.4166	1994	1000	1415	2415	3.4046	sediment trap	Mas et al. (2020)
40	DYF19	7.8666	43.4166	1995	1000	1415	2415	3.9512	sediment trap	Mas et al. (2020)
40	DYF2	7.8666	43.4166	1988	1000	1415	2415	3.8229	sediment trap	Mas et al. (2020)
40	DYF20	7.8666	43.4166	1995	200	2105	2305	3.87	sediment trap	Mas et al. (2020)
40	DYF23	7.8666	43.4166	1997	200	2105	2305	0.9497	sediment trap	Mas et al. (2020)
40	DYF23	7.8666	43.4166	1998	200	2105	2305	7.9818	sediment trap	Mas et al. (2020)
40	DYF23	7.8666	43.4166	1997	1000	1415	2415	1.1221	sediment trap	Mas et al. (2020)
40	DYF23	7.8666	43.4166	1998	1000	1415	2415	3.3391	sediment trap	Mas et al. (2020)
40	DYF26	7.8666	43.4166	1999	200	2105	2305	4.8294	sediment trap	Mas et al. (2020)
40	DYF26	7.8666	43.4166	1999	1000	1415	2415	3.4864	sediment trap	Mas et al. (2020)
40	DYF28	7.8666	43.4166	2000	200	2105	2305	12.3522	sediment trap	Mas et al. (2020)
40	DYF28	7.8666	43.4166	2000	1000	1415	2415	8.2587	sediment trap	Mas et al. (2020)
40	DYF31	7.8666	43.4166	2001	200	2105	2305	5.1144	sediment trap	Mas et al. (2020)
40	DYF31	7.8666	43.4166	2001	1000	1415	2415	1.4364	sediment trap	Mas et al. (2020)
40	DYF35	7.8666	43.4166	2002	200	2105	2305	6.9726	sediment trap	Mas et al. (2020)
40	DYF35	7.8666	43.4166	2002	1000	1415	2415	6.0423	sediment trap	Mas et al. (2020)
40	DYF39	7.8666	43.4166	2004	200	2105	2305	6.3133	sediment trap	Mas et al. (2020)
40	DYF39	7.8666	43.4166	2004	1000	1415	2415	5.493	sediment trap	Mas et al. (2020)
40	DYF4	7.8666	43.4166	1989	200	2105	2305	8.1671	sediment trap	Mas et al. (2020)
40	DYF4	7.8666	43.4166	1989	1000	1415	2415	1.9963	sediment trap	Mas et al. (2020)
40	DYF42	7.8666	43.4166	2005	200	2105	2305	5.0321	sediment trap	Mas et al. (2020)
40	DYF42	7.8666	43.4166	2005	1000	1415	2415	4.4913	sediment trap	Mas et al. (2020)
40	DYF45	7.8666	43.4166	2006	200	2105	2305	4.2816	sediment trap	Mas et al. (2020)
40	DYF45	7.8666	43.4166	2006	1000	1415	2415	2.0895	sediment trap	Mas et al. (2020)
40	DYF47	7.8666	43.4166	2007	200	2105	2305	13.407	sediment trap	Mas et al. (2020)
40	DYF47	7.8666	43.4166	2007	1000	1415	2415	6.8256	sediment trap	Mas et al. (2020)
40	DYF50	7.8666	43.4166	2009	200	2105	2305	4.1151	sediment trap	Mas et al. (2020)
40	DYF50	7.8666	43.4166	2010	200	2105	2305	4.8108	sediment trap	Mas et al. (2020)
40	DYF50	7.8666	43.4166	2009	1000	1415	2415	2.2682	sediment trap	Mas et al. (2020)
40	DYF50	7.8666	43.4166	2010	1000	1415	2415	4.2798	sediment trap	Mas et al. (2020)
40	DYF51	7.8666	43.4166	2011	1000	1415	2415	1.5528	sediment trap	Mas et al. (2020)
40	DYF52	7.8666	43.4166	2011	200	2105	2305	2.8397	sediment trap	Mas et al. (2020)
40	DYF52	7.8666	43.4166	2012	200	2105	2305	4.3835	sediment trap	Mas et al. (2020)
40	DYF52	7.8666	43.4166	2012	1000	1415	2415	1.3734	sediment trap	Mas et al. (2020)
40	DYF53	7.8666	43.4166	2013	200	2105	2305	2.8782	sediment trap	Mas et al. (2020)
40	DYF53	7.8666	43.4166	2013	1000	1415	2415	4.1733	sediment trap	Mas et al. (2020)
40	DYF54	7.8666	43.4166	2014	200	2105	2305	2.5461	sediment trap	Mas et al. (2020)
40	DYF54	7.8666	43.4166	2014	1000	1415	2415	3.2518	sediment trap	Mas et al. (2020)
40	DYF55	7.8666	43.4166	2015	200	2105	2305	1.9604	sediment trap	Mas et al. (2020)
40	DYF55	7.8666	43.4166	2015	1000	1415	2415	1.9408	sediment trap	Mas et al. (2020)
40	DYF56	7.8666	43.4166	2016	200	2105	2305	1.336	sediment trap	Mas et al. (2020)
40	DYF56	7.8666	43.4166	2016	1000	1415	2415	1.6248	sediment trap	Mas et al. (2020)
40	DYF57	7.8666	43.4166	2017	200	2105	2305	0.772	sediment trap	Mas et al. (2020)
40	DYF57	7.8666	43.4166	2017	1000	1415	2415	1.0605	sediment trap	Mas et al. (2020)
40	DYF9	7.8666	43.4166	1990	200	2105	2305	6.6944	sediment trap	Mas et al. (2020)
40	DYF9	7.8666	43.4166	1990	1000	1415	2415	3.8573	sediment trap	Mas et al. (2020)
41	Gakkel_A1-1	124.767	83.2705	2011	240	4000	4240	2.0317	sediment trap	Nothig et al. (2020)
41	Gakkel_A1-1	124.767	83.2705	2012	240	4000	4240	1.8217	sediment trap	Nothig et al. (2020)
41	Gakkel_A1-1	124.767	83.2705	2011	4090	150	4240	0.3014	sediment trap	Nothig et al. (2020)
41	Gakkel_A1-1	124.767	83.2705	2012	4090	150	4240	0.8733	sediment trap	Nothig et al. (2020)
42	Gakkel_N1-1	109.02	82.6456	2011	285	3315	3600	1.3671	sediment trap	Nothig et al. (2020)
42	Gakkel_N1-1	109.02	82.6456	2012	285	3315	3600	2.4583	sediment trap	Nothig et al. (2020)
42	Gakkel_N1-1	109.02	82.6456	2011	3465	135	3600	0.3429	sediment trap	Nothig et al. (2020)
42	Gakkel_N1-1	109.02	82.6456	2012	3465	135	3600	0.7817	sediment trap	Nothig et al. (2020)
43	GOA	34.93	29.46	2015	398	205	603	28.7166	sediment trap	Chernihovsky et al. (2020)
43	GOA	34.93	29.46	2016	403	202	605	36.9811	sediment trap	Chernihovsky et al. (2020)
44	St4	32.35	75.13	1999	150	99	249	265.2	sediment trap	Coppola et al. (2002)
45	St5	31.71	73.81	1999	200	136	336	237.6	sediment trap	Coppola et al. (2002)
46	H	-92.5	6.5	1980-1981	505	3088	3593	3.7249	sediment trap	Moore and Dymond (1991)
46	H	-92.5	6.5	1980-1981	1465	2128	3593	5.1781	sediment trap	Moore and Dymond (1991)
46	H	-92.5	6.5	1980-1981	3075	518	3593	3.794	sediment trap	Moore and Dymond (1991)
47	M	-104	8.8	1980-1981	635	2476	3111	2.5216	sediment trap	Moore and Dymond (1991)
47	M	-104	8.8	1980-1981	1565	1546	3111	3.4784	sediment trap	Moore and Dymond (1991)
47	M	-104	8.8	1980-1981	2700	411	3111	4.2871	sediment trap	Moore and Dymond (1991)
47	M	-104	8.8	1980-1981	3050	61	3111	3.9715	sediment trap	Moore and Dymond (1991)
48	S	-140	11	1982-1985	2500	2347	4847	2.2192	sediment trap	Moore and Dymond (1991)
49	site C	-139	1	1982-1984	2695	1656	4351	4.4647	sediment trap	Moore and Dymond (1991)
49	site C	-139	1	1984-1985	3920	431	4351	4.629	sediment trap	Moore and Dymond (1991)
49	site C	-139	1	1982-1984	4170	181	4351	3.2278	sediment trap	Moore and Dymond (1991)
49	site C	-139	1	1984-1985	4220	131	4351	4.6981	sediment trap	Moore and Dymond (1991)
50	LZ1	13.0833	-25.4783	2000	960	835	1795	35.0709	sediment trap	Vorrath et al. (2018)
51	WB1	12.4333	-23.0316	2000	968	835	1803	15.2098	POM = 1.8 × POC	Vorrath et al. (2018)
52	K2	160	47	2005	50	5148	5198	51.13	sediment trap	Buesseler and Boyd (2009)
53	AO-NH	150.5	-61.5	1983	520	3060	3580	97.3066	POM = 1.8 × POC	Noriki and Tsunogai (1986)
54	1C	142.5	41.5	1991	520	750	1270	22.7913	sediment trap	Otosaka and Noriki (2005)
55	1D	144.217	40.9167	1988	5200	170	5370	13.2924	sediment trap	Otosaka and Noriki (2005)
55	1D	144.217	40.9167	1989	5200	170	5370	10.7256	sediment trap	Otosaka and Noriki (2005)
56	2C	142.5	41.5	1992	600	670	1270	7.0497	sediment trap	Otosaka and Noriki (2005)
56	2C	142.5	41.5	1993	600	670	1270	4.8376	sediment trap	Otosaka and Noriki (2005)
57	2D	144.517	40.4833	1992	500	6600	7100	2.9308	sediment trap	Otosaka and Noriki (2005)
57	2D	144.517	40.4833	1993	500	6600	7100	5.3176	sediment trap	Otosaka and Noriki (2005)
57	2D	144.517	40.4833	1992	6620	480	7100	17.6543	sediment trap	Otosaka and Noriki (2005)
58	3B	136.5	39.4833	1999	1131	1859	2990	28.589	sediment trap	Otosaka and Noriki (2005)
58	3B	136.5	39.4833	2000	1131	1859	2990	21.1686	sediment trap	Otosaka and Noriki (2005)
59	3D	144.517	40.4833	1996	1100	6000	7100	8.8495	sediment trap	Otosaka and Noriki (2005)
60	4B	135.017	38	2000	1175	1500	2675	16.3813	sediment trap	Otosaka and Noriki (2005)
60	4B	135.017	38	2001	1175	1500	2675	27.1382	sediment trap	Otosaka and Noriki (2005)
60	4B	135.017	38	2000	2100	575	2675	10.3468	sediment trap	Otosaka and Noriki (2005)
60	4B	135.017	38	2001	2100	575	2675	18.3879	sediment trap	Otosaka and Noriki (2005)
61	St 1	-103.93	12.8	1984-1987	2628.5	1.5	2630	35	sediment trap	Khripounoff and Alberic (1991)
62	St 2	-103.941	12.8158	1984-1987	2600	0	2600	14	sediment trap	Khripounoff and Alberic (1991)
63	St 3	-103.866	12.7097	1984-1987	2370	50	2420	8.3	sediment trap	Khripounoff and Alberic (1991)
64	BATS	-64.2	31.7	2013	150	4341	4491	14.56	sediment trap	Durkin et al. (2015)
64	BATS	-64.2	31.7	2013	300	4191	4491	5.976	sediment trap	Durkin et al. (2015)
65	St 2	-45	-38	2013	125	5008	5133	50.64	sediment trap	Durkin et al. (2015)
66	St 5	-38.5	-28.2	2013	125	4208	4333	50.58	sediment trap	Durkin et al. (2015)
67	NAP	-63.92	23.2667	1983	1464	4383	5847	1.7726	sediment trap	Fisher et al. (1988)
67	NAP	-63.92	23.2667	1984	1464	4383	5847	0.9507	sediment trap	Fisher et al. (1988)
67	NAP	-63.92	23.2667	1983	4832	1015	5847	1.3219	sediment trap	Fisher et al. (1988)
67	NAP	-63.92	23.2667	1984	4832	1015	5847	1.3068	sediment trap	Fisher et al. (1988)
68	ALOHA-2	-157.998	22.75	2004	272	4451	4723	3.396	sediment trap	Trull et al. (2008)
69	K2-2	160	47	2005	281	4917	5198	11.787	sediment trap	Trull et al. (2008)
70	2	-44.97	-38	2013	125	5006	5131	41	sediment trap	Durkin et al. (2016)
71	4	-41	-31.25	2013	125	3722	3847	43	sediment trap	Durkin et al. (2016)
72	5	-38.5	-28.24	2013	128	4249	4377	46.5	sediment trap	Durkin et al. (2016)
73	7	-33.02	-22.49	2013	125	4410	4535	30	sediment trap	Durkin et al. (2016)
74	8	-29	-17	2013	125	4966	5091	19	sediment trap	Durkin et al. (2016)
75	9	-27.5	-13.5	2013	125	5258	5383	38	sediment trap	Durkin et al. (2016)
76	10	-26	-9.5	2013	125	5464	5589	46	sediment trap	Durkin et al. (2016)
77	12	-26	-5.7	2013	125	5410	5535	44.5	sediment trap	Durkin et al. (2016)
77	13	-29	-5.7	2013	125	5310	5435	56	sediment trap	Durkin et al. (2016)
78	15	-28.5	-2.6	2013	125	4762	4887	34	sediment trap	Durkin et al. (2016)
79	16	-33.49	0	2013	125	4426	4551	30	sediment trap	Durkin et al. (2016)
80	17	-37	1.5	2013	125	4006	4131	39	sediment trap	Durkin et al. (2016)
81	18	-39	3.5	2013	125	4558	4683	45	sediment trap	Durkin et al. (2016)
82	19	-41.26	5.92	2013	125	4662	4787	56	sediment trap	Durkin et al. (2016)
83	20	-45	5.91	2013	125	3408	3533	52	sediment trap	Durkin et al. (2016)
84	21	-48	6.5	2013	125	3892	4017	37.55	sediment trap	Durkin et al. (2016)
85	22	-50	8.25	2013	125	4334	4459	63	sediment trap	Durkin et al. (2016)
86	23	-55.3	9.7	2013	125	3598	3723	37	sediment trap	Durkin et al. (2016)
87	L1	-22	33	1995	2000	3500	5500	2.9	sediment trap	Waniek et al. (2005)
87	L1	-22	33	2001	2000	3500	5500	2.6	sediment trap	Waniek et al. (2005)
88	L3	-21	54	1992-1993	2200	1300	3500	2.6	sediment trap	Waniek et al. (2005)
88	L3	-21	54	1993-1994	2200	1300	3500	2.2	sediment trap	Waniek et al. (2005)
88	L3	-21	54	1994-1995	2200	1300	3500	1.6	sediment trap	Waniek et al. (2005)
88	L3	-21	54	1995-1996	2200	1300	3500	7.3	sediment trap	Waniek et al. (2005)
88	L3	-21	54	1996-1997	2200	1300	3500	1.7	sediment trap	Waniek et al. (2005)
89	PIT-A	-64.166	31.75	1992	95	4476	4571	24	sediment trap	Buesseler et al. (1994)
90	SBB	-119	34	1999	100	400	500	43.2	sediment trap	Goldthwait and Alldredge (2006)	strong upwelling zone
90	SBB	-119	34	2001	100	400	500	40.8	sediment trap	Goldthwait and Alldredge (2006)	strong upwelling zone
90	SBB	-119	34	2002	100	400	500	48	sediment trap	Goldthwait and Alldredge (2006)	strong upwelling zone
91	-	-129.917	47.9667	1984	700	1823	2523	2.8493	sediment trap	Dymond and Roth (1988)
91	-	-129.917	47.9667	1984	1200	1323	2523	3.0228	sediment trap	Dymond and Roth (1988)
91	-	-129.917	47.9667	1984	2100	423	2523	2.5205	sediment trap	Dymond and Roth (1988)
92	MS-4	-169.9	-63.15	1996	1031	1854	2885	16.086	sediment trap	Honjo et al. (2000)
92	MS-4	-169.9	-63.15	1997	1031	1854	2885	8.748	sediment trap	Honjo et al. (2000)
93	MS-5	-169.667	-66.1666	1996	937	2079	3016	0.93	sediment trap	Honjo et al. (2000)
93	MS-5	-169.667	-66.1666	1997	937	2079	3016	9.1604	sediment trap	Honjo et al. (2000)
94	KOMO	-131.333	10.5	2003	4950	55	5005	1.4341	sediment trap	Kim et al. (2011)
94	KOMO	-131.333	10.5	2006	4950	55	5005	0.522	sediment trap	Kim et al. (2011)
94	KOMO	-131.333	10.5	2007	4950	55	5005	1.1809	sediment trap	Kim et al. (2011)
94	KOMO	-131.333	10.5	2008	4950	55	5005	7.2857	sediment trap	Kim et al. (2011)
95	MMP	-68.3	39.5	2004	1000	1927	2927	11.5	sediment trap	Hwang et al. (2017)
95	MMP	-68.3	39.5	2004	2000	927	2927	8.5	sediment trap	Hwang et al. (2017)
95	MMP	-68.3	39.5	2004	3000	20	3020	8.5	sediment trap	Hwang et al. (2017)
96	A01-90	-143.568	72.621	1990	615	2724	3339	0.2	sediment trap	O’Brien et al. (2013)
96	A01-90	-143.568	72.621	1991	615	2724	3339	0.8217	sediment trap	O’Brien et al. (2013)
96	A01-90	-143.568	72.621	1990	1515	1824	3339	0.48	sediment trap	O’Brien et al. (2013)
96	A01-90	-143.568	72.621	1991	1515	1824	3339	1.31	sediment trap	O’Brien et al. (2013)
97	A01-92	-143.83	72.542	1992	600	2775	3375	0.2525	POM = 2 × POC	O’Brien et al. (2013)
97	A01-92	-143.83	72.542	1993	600	2775	3375	0.5922	POM = 2 × POC	O’Brien et al. (2013)
98	A01-93	-143.866	72.517	1993	568	2802	3370	1.44	POM = 2 × POC	O’Brien et al. (2013)
98	A01-93	-143.866	72.517	1994	568	2802	3370	2.215	POM = 2 × POC	O’Brien et al. (2013)
99	N.Atlantic	-21	48	文中有具体引用	2000	2400	4400	3.7586	sediment trap	Antia et al. (1999)
99	N.Atlantic	-21	48	文中有具体引用	3000	1400	4400	2.7277	sediment trap	Antia et al. (1999)
100	A	-150	75	2004-2005	2050	1775	3825	0.34	sediment trap	Hwang et al. (2015)
100	A	-150	75	2007-2008	2050	1775	3825	0.82	sediment trap	Hwang et al. (2015)
100	A	-150	75	2004-2005	3067	758	3825	0.47	sediment trap	Hwang et al. (2015)
100	A	-150	75	2007-2008	3100	725	3825	0.695	sediment trap	Hwang et al. (2015)
100	A	-150	75	2008-2009	3100	725	3825	1.1	sediment trap	Hwang et al. (2015)
100	A	-150	75	2010-2011	3100	725	3825	0.54	sediment trap	Hwang et al. (2015)
101	B	-150	78	2007	3056	765	3821	0.54	sediment trap	Hwang et al. (2015)
101	B	-150	78	2008	3056	765	3821	0.29	sediment trap	Hwang et al. (2015)
101	B	-150	78	2010	3056	765	3821	0.42	sediment trap	Hwang et al. (2015)
102	C	-140	77	2007-2008	2878	844	3722	0.15	sediment trap	Hwang et al. (2015)
102	C	-140	77	2007-2008	3047	675	3722	0.26	sediment trap	Hwang et al. (2015)
103	D	-140	74	2008-2009	2878	640	3518	0.23	sediment trap	Hwang et al. (2015)
104	FM1	135	16.5	2007	1000	2865	3865	1.444	sediment trap	Jeek Kim et al. (2014)
104	FM1	135	16.5	2008	1000	2865	3865	1.7514	sediment trap	Jeek Kim et al. (2014)
104	FM1	135	16.5	2009	1000	2865	3865	0.9228	sediment trap	Jeek Kim et al. (2014)
104	FM1	135	16.5	2010	1000	2865	3865	0.6471	sediment trap	Jeek Kim et al. (2014)
104	FM1	135	16.5	2011	1000	2865	3865	1.4525	sediment trap	Jeek Kim et al. (2014)
105	Bransfield	-59.9849	-62.8969	1995	500	500	1000	6.9555	sediment trap	Palanques et al. (2002)
105	Bransfield	-59.9849	-62.8969	1996	500	500	1000	45.6339	sediment trap	Palanques et al. (2002)
106	CATSTIX	-94.766	26.9333	1987	636	814	1450	10.1299	sediment trap	Walsh and Gardner (1992)
106	CATSTIX	-94.766	26.9333	1987	1236	214	1450	9.8918	sediment trap	Walsh and Gardner (1992)
107	BOFS	-21.1667	19	1990	1140	2155	3295	23.9944	POM = 1.8 × POC	Bory and Newton (2000)
107	BOFS	-21.1667	19	1990	2190	1105	3295	19.3794	POM = 1.8 × POC	Bory and Newton (2000)
107	BOFS	-21.1667	19	1990	3190	105	3295	13.32	POM = 1.8 × POC	Bory and Newton (2000)
108	ETNA-1	-21	10	2014	100	5119	5219	69.4	sediment trap	Engel et al. (2017)
108	ETNA-1	-21	10	2014	400	4819	5219	23.8	sediment trap	Engel et al. (2017)
109	ETNA-2	-21	10.25	2014	100	5211	5311	76.3	sediment trap	Engel et al. (2017)
109	ETNA-2	-21	10.25	2014	400	4911	5311	28.1	sediment trap	Engel et al. (2017)
110	L2-93(58)	-19.8	47.8	1993	2000	2548	4548	4.905	POM = 2.2 × POC	Kuss and Kremling (1999)
111	L2-A-92(42)	-19.65	47.8333	1992	1000	3574	4574	5.2128	POM = 2.2 × POC	Kuss and Kremling (1999)
111	L2-A-92(43)	-19.65	47.8333	1992	3500	1074	4574	2.9047	POM = 2.2 × POC	Kuss and Kremling (1999)
112	L2-B-92(49)	-19.7833	47.8	1992	1030	3547	4577	2.3028	POM = 2.2 × POC	Kuss and Kremling (1999)
112	L2-B-92(50)	-19.7833	47.8	1992	2030	2547	4577	3.5625	POM = 2.2 × POC	Kuss and Kremling (1999)
113	L3-93(61)	-21.23	54.65	1993	1000	2074	3074	3.7882	POM = 2.2 × POC	Kuss and Kremling (1999)
114	BS	15	74	1989	1588	20	1608	51.5342	sediment trap	Francois et al. (1995)
115	EP5	-140	-5	1992	1216	2987	4203	2.8493	sediment trap	Francois et al. (1995)
115	EP5	-140	-5	1992	2099	2104	4203	2.7507	sediment trap	Francois et al. (1995)
116	FS-1	1	79	1984	2440	87	2527	1.1233	sediment trap	Francois et al. (1995)
117	GB-2	-7	75	1985	881	2564	3445	2.9041	sediment trap	Francois et al. (1995)
117	GB-2	-7	75	1985	2823	622	3445	1.0959	sediment trap	Francois et al. (1995)
118	PAPA C	-138	49	1985-1986	3500	508	4008	5.9452	sediment trap	Francois et al. (1995)
119	PB(<1mm)	-81.8833	5.33	1978	667	3203	3870	12.5753	sediment trap	Francois et al. (1995)
119	PB(<1mm)	-81.8833	5.33	1979	665	3205	3870	13.0137	sediment trap	Francois et al. (1995)
119	PB(<1mm)	-81.8833	5.33	1978	1268	2602	3870	9.7945	sediment trap	Francois et al. (1995)
119	PB(<1mm)	-81.8833	5.33	1979	2265	1600	3865	9.9726	sediment trap	Francois et al. (1995)
119	PB(<1mm)	-81.8833	5.33	1979	3769	101	3870	10.9452	sediment trap	Francois et al. (1995)
120	P1	-151.467	15.35	1978	378	5414	5792	2.058	sediment trap	Honjo et al. (1982)
120	P1	-151.467	15.35	1978	2778	3014	5792	1.092	sediment trap	Honjo et al. (1982)
120	P1	-151.467	15.35	1978	4280	1512	5792	0.768	sediment trap	Honjo et al. (1982)
121	0°N	-140	0	1992	880	3443	4323	4.6457	sediment trap	Honjo et al. (1995)
121	0°N	-140	0	1992	2284	2039	4323	4.4957	sediment trap	Honjo et al. (1995)
121	0°N	-140	0	1992	3618	705	4323	4.3778	sediment trap	Honjo et al. (1995)
122	12S	-135	-12	1992	1292	3047	4339	1.5192	sediment trap	Honjo et al. (1995)
122	12S	-135	-12	1993	1292	3047	4339	1.5	sediment trap	Honjo et al. (1995)
122	12S	-135	-12	1992	3594	745	4339	0.7164	sediment trap	Honjo et al. (1995)
122	12S	-135	-12	1993	3594	745	4339	0.672	sediment trap	Honjo et al. (1995)
123	2°N	-140	2	1992	2203	2166	4369	4.1349	sediment trap	Honjo et al. (1995)
124	2S	-139.75	-1.95	1992	3593	705	4298	3.641	sediment trap	Honjo et al. (1995)
124	2S	-139.75	-1.95	1993	3593	705	4298	3.123	sediment trap	Honjo et al. (1995)
125	5°N	-140	5	1992	1191	3248	4439	6.0211	sediment trap	Honjo et al. (1995)
125	5°N	-140	5	1992	2091	2348	4439	4.5087	sediment trap	Honjo et al. (1995)
125	5°N	-140	5	1992	3793	646	4439	3.6934	sediment trap	Honjo et al. (1995)
126	5S	-139.725	-4.95	1992	2099	2104	4203	2.7766	sediment trap	Honjo et al. (1995)
126	5S	-139.725	-4.95	1993	2099	2104	4203	2.202	sediment trap	Honjo et al. (1995)
127	9°N	-140	9	1992	1250	3685	4935	2.604	sediment trap	Honjo et al. (1995)
127	9°N	-140	9	1992	2150	2785	4935	1.5196	sediment trap	Honjo et al. (1995)
127	9°N	-140	9	1993	2250	2685	4935	1.368	sediment trap	Honjo et al. (1995)
127	9°N	-140	9	1992	4400	535	4935	1.0907	sediment trap	Honjo et al. (1995)
128	Site10-1	160.565	1.22	1994	1164	2017	3181	2.5376	sediment trap	Kawahata et al. (2000)
128	Site10-7	160.565	1.22	1995	1164	2017	3181	1.4102	sediment trap	Kawahata et al. (2000)
129	Site2-1	136.277	4.125	1991	1769	3119	4888	4.5375	sediment trap	Kawahata et al. (2000)
129	Site2-1	136.277	4.125	1991	4574	314	4888	2.6651	sediment trap	Kawahata et al. (2000)
129	Site2-15	136.277	4.125	1992	1769	3119	4888	11.4015	sediment trap	Kawahata et al. (2000)
129	Site2-15	136.277	4.125	1992	4574	314	4888	13.0986	sediment trap	Kawahata et al. (2000)
130	Site3-1	175.162	0.0033	1992	1357	3523	4880	3.0197	sediment trap	Kawahata et al. (2000)
130	Site3-1	175.162	0.0033	1992	4363	517	4880	1.6015	sediment trap	Kawahata et al. (2000)
130	Site3-15	175.162	0.0033	1993	1357	3523	4880	0.7474	sediment trap	Kawahata et al. (2000)
130	Site3-15	175.162	0.0033	1993	4363	517	4880	1.3067	sediment trap	Kawahata et al. (2000)
131	Site4-1	175.007	7.9266	1992	1637	3623	5260	1.1712	sediment trap	Kawahata et al. (2000)
131	Site4-1	175.007	7.9266	1992	4743	517	5260	0.725	sediment trap	Kawahata et al. (2000)
131	Site4-12	175.007	7.9266	1993	4743	517	5260	0.8254	sediment trap	Kawahata et al. (2000)
132	AB1	-176.937	53.5333	1990	3193	566	3759	5.34	sediment trap	Takahashi et al. (2000)
132	AB1	-176.937	53.5333	1991	3193	566	3759	4.4857	sediment trap	Takahashi et al. (2000)
133	AB2	-177.083	53.5166	1991	3200	590	3790	6.92	sediment trap	Takahashi et al. (2000)
133	AB2	-177.083	53.5166	1992	3200	590	3790	7.1125	sediment trap	Takahashi et al. (2000)
134	AB3	-177.078	53.5	1992	3200	590	3790	9.5167	sediment trap	Takahashi et al. (2000)
134	AB3	-177.078	53.5	1993	3200	590	3790	5.84	sediment trap	Takahashi et al. (2000)
135	AB4	-177.07	53.4983	1993	3199	590	3789	9.2	sediment trap	Takahashi et al. (2000)
135	AB4	-177.07	53.4983	1994	3199	590	3789	11.94	sediment trap	Takahashi et al. (2000)
136	AB5	-176.995	53.5066	1994	3198	590	3788	6.3	sediment trap	Takahashi et al. (2000)
136	AB5	-176.995	53.5066	1995	3198	590	3788	5.9143	sediment trap	Takahashi et al. (2000)
137	SA2	-174.007	49.005	1990	4826	594	5420	3.38	sediment trap	Takahashi et al. (2000)
137	SA2	-174.007	49.005	1991	4826	594	5420	3.2	sediment trap	Takahashi et al. (2000)
138	SA3	-173.913	48.9966	1991	4806	594	5400	5.48	sediment trap	Takahashi et al. (2000)
138	SA3	-173.913	48.9966	1992	4806	594	5400	4.0167	sediment trap	Takahashi et al. (2000)
139	SA4	-173.975	48.9916	1992	4833	594	5427	3.2167	sediment trap	Takahashi et al. (2000)
139	SA4	-173.975	48.9916	1993	4833	594	5427	3.3667	sediment trap	Takahashi et al. (2000)
140	SA5	-173.965	48.995	1993	4822	594	5416	6.55	sediment trap	Takahashi et al. (2000)
140	SA5	-173.965	48.995	1994	4822	594	5416	4.85	sediment trap	Takahashi et al. (2000)
141	SA6	-174	49.015	1994	4774	594	5368	4.2333	sediment trap	Takahashi et al. (2000)
141	SA6	-174	49.015	1995	4774	594	5368	3.1167	sediment trap	Takahashi et al. (2000)
142	NB	0.0833	70	1986-1987	500	2733	3233	9.8082	sediment trap	Vonbodungen et al. (1995)
142	NB	0.0833	70	1987-1988	1000	2233	3233	6.0274	sediment trap	Vonbodungen et al. (1995)
142	NB	0.0833	70	1988-1989	3000	233	3233	9.7626	sediment trap	Vonbodungen et al. (1995)
143	OG	-8	72.5	1988-1989	500	2023	2523	7.8265	sediment trap	Vonbodungen et al. (1995)
143	OG	-8	72.5	1989-1990	1000	1523	2523	3.1598	sediment trap	Vonbodungen et al. (1995)
143	OG	-8	72.5	1990-1991	2200	323	2523	0.9452	sediment trap	Vonbodungen et al. (1995)
144	siteA	167.505	-76.5016	1990	230	539	769	40.0147	sediment trap	Dunbar et al. (1998)
144	siteA	167.505	-76.5016	1991	230	539	769	13.2328	sediment trap	Dunbar et al. (1998)
144	siteA	167.505	-76.5016	1992	719	50	769	37.7038	sediment trap	Dunbar et al. (1998)
145	siteB	-174.985	-76.505	1991	230	339	569	16.9785	sediment trap	Dunbar et al. (1998)
145	siteB	-174.985	-76.505	1992	519	50	569	3.7355	sediment trap	Dunbar et al. (1998)
146	siteC	-172.5	-72.5	1990	230	313	543	10.6016	sediment trap	Dunbar et al. (1998)
146	siteC	-172.5	-72.5	1991	230	313	543	4.6053	sediment trap	Dunbar et al. (1998)
146	siteC	-172.5	-72.5	1992	493	50	543	3.015	sediment trap	Dunbar et al. (1998)
147	S	-140	11	1983	700	4147	4847	3.1534	sediment trap	Dymond and Collier (1988)
147	S	-140	11	1983	1600	3247	4847	2.4034	sediment trap	Dymond and Collier (1988)
147	S	-140	11	1983	3400	1447	4847	1.6397	sediment trap	Dymond and Collier (1988)
148	site C	-139	1	1983	1095	3256	4351	3.6161	sediment trap	Dymond and Collier (1988)
148	site C	-139	1	1984	1083	3268	4351	5.9222	sediment trap	Dymond and Collier (1988)
148	site C	-139	1	1984	2908	1443	4351	5.4048	sediment trap	Dymond and Collier (1988)
148	site C	-139	1	1985	2908	1443	4351	4.7315	sediment trap	Dymond and Collier (1988)
148	site C	-139	1	1983	3495	856	4351	3.3247	sediment trap	Dymond and Collier (1988)
149	CB11	-19.68	20.75	1988	2195	1451	3646	3.2877	sediment trap	Fischer et al. (1996)
150	PB2	-85.5833	5.3666	1979	890	2970	3860	2	sediment trap	Honjo (1982)
150	PB2	-85.5833	5.3666	1980	890	2970	3860	11.22	sediment trap	Honjo (1982)
150	PB2	-85.5833	5.3666	1979	2590	1270	3860	4.3	sediment trap	Honjo (1982)
150	PB2	-85.5833	5.3666	1980	2590	1270	3860	12.95	sediment trap	Honjo (1982)
150	PB2	-85.5833	5.3666	1979	3560	300	3860	7.5	sediment trap	Honjo (1982)
150	PB2	-85.5833	5.3666	1980	3560	300	3860	17.3	sediment trap	Honjo (1982)
151	PB2	-85.68	5.3667	1980	3560	300	3860	11.5	sediment trap	Honjo (1982)
152	L2	-19.5	47.85	1989	3100	1455	4555	5.185	POM = 2 × POC	Jickells et al. (1996)
153	PZB-1	72.9758	-62.4771	1999	1400	2600	4000	2.3111	sediment trap	Pilskaln et al. (2004)
153	PZB-1	72.9758	-62.4771	1998	2400	1600	4000	6.3204	sediment trap	Pilskaln et al. (2004)
153	PZB-1	72.9758	-62.4771	1999	2400	1600	4000	5.8548	sediment trap	Pilskaln et al. (2004)
153	PZB-1	72.9758	-62.4771	1998	3400	600	4000	0.5424	sediment trap	Pilskaln et al. (2004)
153	PZB-1	72.9758	-62.4771	1999	3400	600	4000	4.1616	sediment trap	Pilskaln et al. (2004)
154	PZB-2	76.1575	-63.4615	2000	3300	500	3800	2.1738	sediment trap	Pilskaln et al. (2004)
154	PZB-2	76.1575	-63.4615	2001	3300	500	3800	2.106	sediment trap	Pilskaln et al. (2004)
155	PB	-82	5	1979	25	2910	2935	89.36	sediment trap	Bishop et al. (1986)
155	PB	-82	5	1979	290	2645	2935	29.76	sediment trap	Bishop et al. (1986)
155	PB	-82	5	1979	1100	1835	2935	25.68	sediment trap	Bishop et al. (1986)
156	S.T.	-24.66	31.55	1985	4307	1133	5440	0.875	sediment trap	Lampitt (1992)
157	SPB	-118.5	33.5	1983	100	793	893	25.3	sediment trap	Nelson et al. (1987)
157	SPB	-118.5	33.5	1983	300	593	893	23.5333	sediment trap	Nelson et al. (1987)
158	L2	-19.5	47.8333	1989	3100	1455	4555	14.3624	POM = 2 × POC	Newton et al. (1994)
158	L2	-19.5	47.8333	1990	3100	1455	4555	3.441	POM = 2 × POC	Newton et al. (1994)
159	PS-2	-31.1016	36.7614	2012	50	2641	2691	37.6	sediment trap	Collins et al. (2015)
159	PS-2	-31.1016	36.7614	2012	300	2391	2691	9.6	sediment trap	Collins et al. (2015)
160	PS-3	-36.2242	44.704	2012	50	4085	4135	228.5	sediment trap	Collins et al. (2015)
161	PS-4	-39.7957	50.6404	2012	50	4181	4231	168.5	sediment trap	Collins et al. (2015)
161	PS-4	-39.7957	50.6404	2012	300	3931	4231	101	sediment trap	Collins et al. (2015)
162	QL-1	-65.9832	34.788	2012	50	5023	5073	44.3	sediment trap	Collins et al. (2015)
162	QL-1	-65.9832	34.788	2012	300	4773	5073	38.8	sediment trap	Collins et al. (2015)
163	QL-2	-64.5695	29.9364	2012	50	4857	4907	38.35	sediment trap	Collins et al. (2015)
163	QL-2	-64.5695	29.9364	2012	300	4607	4907	14.7	sediment trap	Collins et al. (2015)
164	SAM	178.5	-46.6666	2000	1500	1200	2700	3	POM = 2.2 × POC	Nodder et al. (2016)
165	STM	178.5	-41	2000	1500	1600	3100	6	POM = 2.2 × POC	Nodder et al. (2016)
166	M 269	-57.1	-60.9	1980	965	2660	3625	14.8219	sediment trap	Wefer et al. (1982)
166	M 269	-57.1	-60.9	1980	2540	1085	3625	13.0959	sediment trap	Wefer et al. (1982)
167	St W	-127.69	39.4833	1983	1235	2995	4230	1.9863	sediment trap	Grimalt et al. (1990)
167	St W	-127.69	39.4833	1983	3785	445	4230	1.4384	sediment trap	Grimalt et al. (1990)
167	St W	-127.69	39.4833	1984	3785	445	4230	0.9589	sediment trap	Grimalt et al. (1990)
168	FS3	0.1667	78.751	1988	1488	999	2487	1.46	sediment trap	Hebbeln and Wefer (1991)
168	FS3	0.1667	78.751	1989	1488	999	2487	0.6889	sediment trap	Hebbeln and Wefer (1991)
169	FS4	-4.095	78.4333	1988	1191	572	1763	1.0545	sediment trap	Hebbeln and Wefer (1991)
169	FS4	-4.095	78.4333	1989	1191	572	1763	0.7625	sediment trap	Hebbeln and Wefer (1991)
170	S1	-122	36.8	1989	450	521	971	23.56	sediment trap	Pilskaln et al. (1996)
170	S1	-122	36.8	1990	450	521	971	60.3	sediment trap	Pilskaln et al. (1996)
170	S1	-122	36.8	1991	450	521	971	49.7545	sediment trap	Pilskaln et al. (1996)
170	S1	-122	36.8	1992	450	521	971	47.2714	sediment trap	Pilskaln et al. (1996)
171	IB	26.204	34.5131	2010	4285	50	4335	0.7997	sediment trap	Pedrosa-Pamies et al. (2021)
171	IB	26.204	34.5131	2011	4285	50	4335	0.6824	sediment trap	Pedrosa-Pamies et al. (2021)
171	IB	26.204	34.5131	2012	4285	50	4335	2.3469	sediment trap	Pedrosa-Pamies et al. (2021)
171	IB	26.204	34.5131	2013	4285	50	4335	0.4333	sediment trap	Pedrosa-Pamies et al. (2021)
172	KAMS 1	177.083	76.3316	2017	115	417	532	3.5486	sediment trap	Kim et al. (2021)
172	KAMS 1	177.083	76.3316	2018	115	417	532	16.5417	sediment trap	Kim et al. (2021)
172	KAMS 1	177.083	76.3316	2017	335	197	532	1.6338	sediment trap	Kim et al. (2021)
172	KAMS 1	177.083	76.3316	2018	335	197	532	10.53	sediment trap	Kim et al. (2021)
173	KAMS 2	172.62	75.4	2017	325	207	532	7.5113	sediment trap	Kim et al. (2021)
173	KAMS 2	172.62	75.4	2018	325	207	532	7.5342	sediment trap	Kim et al. (2021)
174	Sa-1	139.3	35.0333	1979	240	1200	1440	93	sediment trap	Tsunogai and Noriki (1991)
175	Sa-2	139.25	35	1981	310	1050	1360	65.85	sediment trap	Tsunogai and Noriki (1991)
175	Sa-2	139.25	35	1981	1150	210	1360	50.4	sediment trap	Tsunogai and Noriki (1991)
176	Sh-1	146.267	41.2667	1978	320	945	1265	17.6	sediment trap	Tsunogai and Noriki (1991)
176	Sh-1	146.267	41.2667	1978	1160	105	1265	18.4	sediment trap	Tsunogai and Noriki (1991)
177	Sh-2	142.4	41.25	1980	150	1190	1340	258	sediment trap	Tsunogai and Noriki (1991)
178	K1	-54.985	-61.7628	1998	1034	1100	2134	23	sediment trap	Kim et al. (2005)
178	K1	-54.985	-61.7628	1999	1034	1100	2134	52.5	sediment trap	Kim et al. (2005)
179	K2	-54.9433	-61.7683	1999	678	1100	1778	33	sediment trap	Kim et al. (2005)
179	K2	-54.9433	-61.7683	2000	678	1100	1778	25.478	sediment trap	Kim et al. (2005)
180	K3	-55.0171	-61.7118	2001	1024	1100	2124	3.8964	sediment trap	Kim et al. (2005)
181	MAP1	-16.5321	48.9343	1996	4838	2	4840	2.8425	sediment trap	Lampitt et al. (2001)
181	MAP1	-16.5321	48.9343	1997	4838	2	4840	7.8788	sediment trap	Lampitt et al. (2001)
182	MAP2	-16.429	48.942	1998	4846	2	4848	5.9883	sediment trap	Lampitt et al. (2001)
183	PAP-ⅩⅤ	-16.3518	48.9996	1995	1000	3812	4812	0.9625	sediment trap	Lampitt et al. (2001)
183	PAP-ⅩⅤ	-16.3518	48.9996	1996	1000	3812	4812	1.066	sediment trap	Lampitt et al. (2001)
183	PAP-ⅩⅤ	-16.3518	48.9996	1995	3000	1812	4812	1.522	sediment trap	Lampitt et al. (2001)
183	PAP-ⅩⅤ	-16.3518	48.9996	1996	3000	1812	4812	1.37	sediment trap	Lampitt et al. (2001)
183	PAP-ⅩⅤ	-16.3518	48.9996	1995	4712	100	4812	1.954	sediment trap	Lampitt et al. (2001)
183	PAP-ⅩⅤ	-16.3518	48.9996	1996	4712	100	4812	1.6463	sediment trap	Lampitt et al. (2001)
184	PAP-ⅩⅤⅢ	-16.2993	49.0667	1996	1000	3807	4807	3.294	sediment trap	Lampitt et al. (2001)
184	PAP-ⅩⅤⅢ	-16.2993	49.0667	1997	1000	3807	4807	0.765	sediment trap	Lampitt et al. (2001)
184	PAP-ⅩⅤⅢ	-16.2993	49.0667	1996	3000	1807	4807	3.4417	sediment trap	Lampitt et al. (2001)
184	PAP-ⅩⅤⅢ	-16.2993	49.0667	1997	3000	1807	4807	1.0933	sediment trap	Lampitt et al. (2001)
185	PAP-V	-19.48	47.75	1990	3000	1572	4572	3.4909	sediment trap	Lampitt et al. (2001)
186	PF1	5.7667	-50.15	1987	700	3050	3750	5.7	sediment trap	Wefer and Fischer (1991)
187	F	-10.8231	80.4284	1992	130	223	353	5.45	sediment trap	Bauerfeind et al. (1997)
187	F	-10.8231	80.4284	1993	130	223	353	2.5273	sediment trap	Bauerfeind et al. (1997)
187	F	-10.8231	80.4284	2009	130	223	353	3.2	sediment trap	Bauerfeind et al. (1997)
188	NCR	178.633	-42.7	1996	300	1200	1500	24.3663	sediment trap	Nodder and Northcote (2001)
188	NCR	178.633	-42.7	1997	300	1200	1500	15.3438	sediment trap	Nodder and Northcote (2001)
189	SCR	178.617	-44.6166	1996	300	1200	1500	7.5838	sediment trap	Nodder and Northcote (2001)
189	SCR	178.617	-44.6166	1997	300	1200	1500	1.8193	sediment trap	Nodder and Northcote (2001)
190	SP 1	6.74	78.8833	1987	1087	531	1618	19.2385	sediment trap	Hebbeln (2000)
190	SP 2	6.7416	78.8833	1988	1110	551	1661	7.8231	sediment trap	Hebbeln (2000)
190	SP 2	6.7416	78.8833	1989	1110	551	1661	21.2571	sediment trap	Hebbeln (2000)
191	SP 3	6.66	78.8667	1989	1125	551	1676	17.3167	sediment trap	Hebbeln (2000)
191	SP 3	6.66	78.8667	1990	1125	551	1676	32.925	sediment trap	Hebbeln (2000)
192	CH-1	-73.1842	-29.9878	1991	3700	680	4380	9.2286	sediment trap	Hebbeln et al. (2000)
192	CH-1	-73.1842	-29.9878	1992	3700	680	4380	4.7154	sediment trap	Hebbeln et al. (2000)
193	CH-3	-73.1833	-30.0175	1993	2300	2060	4360	12.6879	sediment trap	Hebbeln et al. (2000)
193	CH-3	-73.1833	-30.0175	1994	2300	2060	4360	7.98	sediment trap	Hebbeln et al. (2000)
193	CH-3	-73.1833	-30.0175	1993	3700	660	4360	8.8726	sediment trap	Hebbeln et al. (2000)
193	CH-3	-73.1833	-30.0175	1994	3700	660	4360	5.48	sediment trap	Hebbeln et al. (2000)
194	CH-4	-73.1712	-30.005	1994	2300	2060	4360	2.322	sediment trap	Hebbeln et al. (2000)
195	site11	155.993	-12.9933	1995	1315	517	1832	1.5059	POM = 1.8 × POC	Kawahata (2002)
196	site12	154.825	-17.7616	1995	1298	1523	2821	1.0597	POM = 1.8 × POC	Kawahata (2002)
196	site12	154.825	-17.7616	1995	2304	517	2821	0.5577	POM = 1.8 × POC	Kawahata (2002)
197	site13	161	-35.5166	1995	1161	2013	3174	2.5098	POM = 1.8 × POC	Kawahata (2002)
198	CR15	152.317	16.8167	2015	400	1810	2210	1.1656	sediment trap	Kim et al. (2018)
198	CR15	152.317	16.8167	2015	1710	500	2210	0.4788	sediment trap	Kim et al. (2018)
199	61S	139.899	-61	2001	2000	2325	4325	3.925	sediment trap	Rigual-Hernández et al. (2015)
199	61S	139.899	-61	2002	2000	2325	4325	6.8471	sediment trap	Rigual-Hernández et al. (2015)
199	61S	139.899	-61	2001	3700	625	4325	5.55	sediment trap	Rigual-Hernández et al. (2015)
200	1	-15.811	-48.024	2009	200	3435	3635	5.56	sediment trap	Ebersbach et al. (2014)
201	3	-15.125	-47.732	2009	450	2501	2951	8.44	sediment trap	Ebersbach et al. (2014)
202	4	-15.265	-47.895	2009	200	3809	4009	4.78	sediment trap	Ebersbach et al. (2014)
203	5	-15.441	-47.503	2009	450	2691	3141	2.83	sediment trap	Ebersbach et al. (2014)
204	6	-15.595	-47.655	2009	450	2525	2975	9.18	sediment trap	Ebersbach et al. (2014)
205	7	-15.417	-47.351	2009	450	2871	3321	22.96	sediment trap	Ebersbach et al. (2014)
206	8	-15.556	-47.3	2009	450	2747	3197	10.97	sediment trap	Ebersbach et al. (2014)
207	9	-15.451	-47.514	2009	200	2941	3141	28.39	sediment trap	Ebersbach et al. (2014)
208	10	-14.467	-48.086	2009	450	2985	3435	12.82	sediment trap	Ebersbach et al. (2014)
209	11	-15.237	-48.796	2009	450	3329	3779	12.85	sediment trap	Ebersbach et al. (2014)
210	S1	-89.71	28.9833	2005	65	1935	2000	74.75	sediment trap	Hung et al. (2010)
211	S2	-88.5	28.8	2005	65	935	1000	98.5	sediment trap	Hung et al. (2010)
212	S3	-92.5	25.8667	2006	65	1915	1980	72.75	sediment trap	Hung et al. (2010)
213	S4	-88.63	26.9167	2006	65	2011	2076	47	sediment trap	Hung et al. (2010)
214	NE	-34.16	54	2007	1500	1000	2500	1.9178	sediment trap	Abell et al. (2013)
214	NE	-34.16	54	2007	2400	100	2500	3.2877	sediment trap	Abell et al. (2013)
215	NW	-39.11	53.9833	2007	1500	1000	2500	0.8219	sediment trap	Abell et al. (2013)
215	NW	-39.11	53.9833	2007	2400	100	2500	2.1918	sediment trap	Abell et al. (2013)
216	SE	-27.71	49.0333	2007	1500	1000	2500	2.4658	sediment trap	Abell et al. (2013)
216	SE	-27.71	49.0333	2007	2400	100	2500	3.0137	sediment trap	Abell et al. (2013)
217	SW	-28.63	48.7667	2007	1500	1000	2500	2.4658	sediment trap	Abell et al. (2013)
217	SW	-28.63	48.7667	2007	2400	100	2500	3.0137	sediment trap	Abell et al. (2013)
218	SPB	-118.5	33.55	1988	500	393	893	31.5769	sediment trap	Thunell et al. (1994)
219	IcB	-24.4	62.15	2010	82	1291	1373	43.5	POM = 2.2 × POC	Marsay et al. (2015)
219	IcB	-24.4	62.15	2010	402	971	1373	17.88	POM = 2.2 × POC	Marsay et al. (2015)
220	IrB	-31.6	60.84	2010	84	2183	2267	23.1	POM = 2.2 × POC	Marsay et al. (2015)
220	IrB	-31.6	60.84	2010	402	1865	2267	6.84	POM = 2.2 × POC	Marsay et al. (2015)
221	NASG	-30.32	25.66	2011	226	5025	5251	3.3	sediment trap	Marsay et al. (2015)
222	NASG	-31.32	26.2	2011	748	4927	5675	0.96	sediment trap	Marsay et al. (2015)
223	NASG	-31.08	26.27	2011	68	5675	5743	21.06	POM = 2.2 × POC	Marsay et al. (2015)
223	NASG	-31.08	26.27	2011	342	5401	5743	1.32	POM = 2.2 × POC	Marsay et al. (2015)
224	NASG	-31.33	26.6	2011	153	5362	5515	6.6	sediment trap	Marsay et al. (2015)
224	NASG	-31.33	26.6	2011	349	5166	5515	1.08	sediment trap	Marsay et al. (2015)
225	NASG	-31.59	26.82	2011	154	5215	5369	5.52	sediment trap	Marsay et al. (2015)
225	NASG	-31.59	26.82	2011	343	5026	5369	1.2	sediment trap	Marsay et al. (2015)
226	PAP	-16.39	48.92	2009	51	4796	4847	56.64	POM = 2.2 × POC	Marsay et al. (2015)
226	PAP	-16.39	48.92	2009	312	4535	4847	17.08	POM = 2.2 × POC	Marsay et al. (2015)
227	PS36/024-5	131.4	79.03	1995	5	3145	3150	225.15	sediment trap	Lalande et al. (2014)
228	PS36/025-4	105.32	81.08	1995	5	2745	2750	64.35	sediment trap	Lalande et al. (2014)
229	PS36/027-3	106.55	81.2	1995	5	3245	3250	60.65	sediment trap	Lalande et al. (2014)
230	PS36/042-3	134.73	78.72	1995	5	2095	2100	80.7	sediment trap	Lalande et al. (2014)
231	PS36/044-3	135.13	79.08	1995	5	2745	2750	126.05	sediment trap	Lalande et al. (2014)
232	PS36/047-3	131.05	80.88	1995	5	3815	3820	106.5	sediment trap	Lalande et al. (2014)
233	PS36/049-3	136.48	81.05	1995	5	2795	2800	98	sediment trap	Lalande et al. (2014)
234	PS36/057-3	150.08	81.2	1995	5	2595	2600	39.5	sediment trap	Lalande et al. (2014)
235	PS36/060-3	150.17	80.3	1995	5	1595	1600	37.5	sediment trap	Lalande et al. (2014)
236	PS36/075-3	123.02	80.87	1995	5	3565	3570	228	sediment trap	Lalande et al. (2014)
237	PS44/059-3	16.18	81.1	1997	5	2072	2077	28.45	sediment trap	Lalande et al. (2014)
238	PS44/064-4	5.57	81.12	1997	5	644	649	34.3	sediment trap	Lalande et al. (2014)
239	PS44/065-3	2.4	81.23	1997	5	1033	1038	39.1	sediment trap	Lalande et al. (2014)
240	PS44/070-2	-6.8	81.52	1997	5	2670	2675	43.4	sediment trap	Lalande et al. (2014)
241	PS44/078-2	0.72	82.28	1997	5	2833	2838	27.8	sediment trap	Lalande et al. (2014)
242	PS44/081-1	5.21	82.2333	1997	25	2902	2927	21.5	sediment trap	Lalande et al. (2014)
243	PS44/087-2	6.32	81.77	1997	5	1409	1414	49.65	sediment trap	Lalande et al. (2014)
244	PS80/224-1	31.11	84.05	2012	5	4008	4013	60.2	sediment trap	Lalande et al. (2014)
245	PS80/237-1	78.1	83.98	2012	5	3479	3484	58.6	sediment trap	Lalande et al. (2014)
246	PS80/255-1	109.58	82.67	2012	5	3564	3569	52.25	sediment trap	Lalande et al. (2014)
247	PS80/277-1	130.12	82.88	2012	5	4156	4161	49.8	sediment trap	Lalande et al. (2014)
248	PS80/323-1	131.12	81.92	2012	5	4026	4031	35.8	sediment trap	Lalande et al. (2014)
249	PS80/335-1	122.24	85.1	2012	5	4349	4354	25.65	sediment trap	Lalande et al. (2014)
250	PS80/349-1	61.21	87.93	2012	25	4355.4	4380.4	8.3	sediment trap	Lalande et al. (2014)
251	PS80/360-1	58.86	88.82	2012	5	4368.5	4373.5	5.3	sediment trap	Lalande et al. (2014)
252	PS80/384-1	17.45	84.37	2012	5	3508.4	3513.4	12.1	sediment trap	Lalande et al. (2014)
253	BS	-57.63	-62.25	1999	960	1000	1960	49.96	sediment trap	Khim et al. (2007)
253	BS	-57.63	-62.25	2000	960	1000	1960	54.98	sediment trap	Khim et al. (2007)
253	BS	-57.63	-62.25	1999	1860	100	1960	25.4	sediment trap	Khim et al. (2007)
253	BS	-57.63	-62.25	2000	1860	100	1960	58.9383	sediment trap	Khim et al. (2007)
254	WPTD1-01	65.5833	24.5983	1993	1466	538	2004	17	sediment trap	Schulz and von Rad (2014)
254	WPTS1-01	65.5833	24.5983	1993	534	1470	2004	25.25	sediment trap	Schulz and von Rad (2014)
254	WPTS1-05	65.5833	24.5983	1994	534	1470	2004	64	sediment trap	Schulz and von Rad (2014)
255	A3	72.0433	-50.3836	2011	289	238	527	5.78	sediment trap	Rembauville et al. (2015)
255	A3	72.0433	-50.3836	2012	289	238	527	6.18	sediment trap	Rembauville et al. (2015)
256	FlySlope	145.217	-9.1858	1997	300	685	985	12.8	sediment trap	Burns et al. (2004)
257	Kerema	145.881	-8.5929	1997	300	543	843	16.2	sediment trap	Burns et al. (2004)
258	SE	145.787	-11.1504	1997	300	1149	1449	22.5	sediment trap	Burns et al. (2004)
258	SE	145.787	-11.1504	1997	1360	89	1449	6.8	sediment trap	Burns et al. (2004)
259	PS2756-1 (PS36/051LOMO-2)	138.9	81.0667	1995	150	1562	1712	1.3614	sediment trap	Fahl and Nöthig (2007)
259	PS2756-1 (PS36/051LOMO-2)	138.9	81.0667	1996	150	1562	1712	4.6077	sediment trap	Fahl and Nöthig (2007)
259	PS2756-1 (PS36/051LOMO-2)	138.9	81.0667	1995	1550	162	1712	3.38	sediment trap	Fahl and Nöthig (2007)
259	PS2756-1 (PS36/051LOMO-2)	138.9	81.0667	1996	1550	162	1712	1.9938	sediment trap	Fahl and Nöthig (2007)
260	TS#2	7.8666	43.4166	2003	117	2298	2415	7.9062	sediment trap	Stewart et al. (2007)
260	TS#2	7.8666	43.4166	2003	238	2177	2415	11.2053	sediment trap	Stewart et al. (2007)
261	EN405-T1	6.01	39.01	2005	25	2828	2853	54.168	sediment trap	Lepore et al. (2009)
262	EN409-T2	-67.23	35.98	2005	80	4945	5025	123.096	sediment trap	Lepore et al. (2009)
263	S2	-122.41	36.6667	1998	320	1549	1869	39.1597	sediment trap	Castro et al. (2018)
263	S2	-122.41	36.6667	1999	320	1549	1869	43.2945	sediment trap	Castro et al. (2018)
263	S2	-122.41	36.6667	2000	320	1549	1869	24.9883	sediment trap	Castro et al. (2018)
263	S2	-122.41	36.6667	2001	320	1549	1869	45.8488	sediment trap	Castro et al. (2018)
263	S2	-122.41	36.6667	2002	320	1549	1869	60.5818	sediment trap	Castro et al. (2018)
263	S2	-122.41	36.6667	2003	320	1549	1869	37.0437	sediment trap	Castro et al. (2018)
263	S2	-122.41	36.6667	2004	320	1549	1869	41.6123	sediment trap	Castro et al. (2018)
263	S2	-122.41	36.6667	2005	320	1549	1869	48.6253	sediment trap	Castro et al. (2018)
263	S2	-122.41	36.6667	1998	1205	664	1869	42.591	sediment trap	Castro et al. (2018)	slope re-suspension
263	S2	-122.41	36.6667	1999	1205	664	1869	35.8825	sediment trap	Castro et al. (2018)	slope re-suspension
263	S2	-122.41	36.6667	2000	1205	664	1869	11.7726	sediment trap	Castro et al. (2018)	slope re-suspension
263	S2	-122.41	36.6667	2001	1205	664	1869	16.5381	sediment trap	Castro et al. (2018)	slope re-suspension
263	S2	-122.41	36.6667	2002	1205	664	1869	40.4049	sediment trap	Castro et al. (2018)	slope re-suspension
263	S2	-122.41	36.6667	2003	1205	664	1869	39.935	sediment trap	Castro et al. (2018)	slope re-suspension
263	S2	-122.41	36.6667	2004	1205	664	1869	43.4845	sediment trap	Castro et al. (2018)	slope re-suspension
263	S2	-122.41	36.6667	2005	1205	664	1869	35.0266	sediment trap	Castro et al. (2018)	slope re-suspension
264	FOFA	5	41.7	2012	2425	25	2450	21.4286	sediment trap	Palanques and Puig (2018)
265	station O	178.005	-63.4333	1999	2400	2000	4400	0.8111	sediment trap	Tesi et al. (2012)
265	station O	178.005	-63.4333	2000	2400	2000	4400	0.9168	sediment trap	Tesi et al. (2012)
266	CBeu6	-18.6983	20.7516	2008	1100	1700	2800	17.8813	sediment trap	Nowald et al. (2015)
266	CBeu6	-18.6983	20.7516	2009	1100	1700	2800	8.6598	sediment trap	Nowald et al. (2015)
267	CBeu7	-18.7116	20.7433	2009	1145	1655	2800	16.5946	sediment trap	Nowald et al. (2015)
267	CBeu7	-18.7116	20.7433	2010	1145	1655	2800	3.4364	sediment trap	Nowald et al. (2015)
268	RS-95 A	-169	-76.7	1994-1995	216	601	817	24.324	sediment trap	McManus et al. (2002)
268	RS-95 A	-169	-76.7	1996-1998	765	52	817	11.256	sediment trap	McManus et al. (2002)
269	IM2	-9.7	42.6333	1997	600	900	1500	14.8333	sediment trap	Fagel et al. (2004)
269	IM2	-9.7	42.6333	1998	600	900	1500	11.7	sediment trap	Fagel et al. (2004)
269	IM2	-9.7	42.6333	1997	1100	400	1500	5.8333	sediment trap	Fagel et al. (2004)
269	IM2	-9.7	42.6333	1998	1100	400	1500	14	sediment trap	Fagel et al. (2004)
270	IM3	-10.01	42.6167	1997	600	1645	2245	8.1667	sediment trap	Fagel et al. (2004)
270	IM3	-10.01	42.6167	1998	600	1645	2245	11.25	sediment trap	Fagel et al. (2004)
270	IM3	-10.01	42.6167	1997	1100	1145	2245	14.3333	sediment trap	Fagel et al. (2004)
270	IM3	-10.01	42.6167	1998	1100	1145	2245	6.6364	sediment trap	Fagel et al. (2004)
271	S	-32.2745	37.2918	1994	1630	79	1709	10.41	sediment trap	Khripounoff et al. (2000)
272	PAL	-66	-64.5	2009	170	180	350	3.12	sediment trap	Buesseler et al. (2010)
273	01-01	68.5912	-21.2467	2016	2614	531	3145	0.35	POM = 1.8 × POC	Harms et al. (2021)
273	01-01	68.5912	-21.2467	2017	2614	531	3145	0.3967	POM = 1.8 × POC	Harms et al. (2021)
274	01-02	68.5888	-21.248	2017	2614	531	3145	0.51	POM = 1.8 × POC	Harms et al. (2021)
274	01-02	68.5888	-21.248	2018	2614	531	3145	0.179	POM = 1.8 × POC	Harms et al. (2021)
275	03-01	69.1617	-22.8852	2016	3169	531	3700	0.6675	POM = 1.8 × POC	Harms et al. (2021)
276	04-01	64.4958	-23.8693	2015	2962	531	3493	0.73	POM = 1.8 × POC	Harms et al. (2021)
276	04-01	64.4958	-23.8693	2016	2962	531	3493	0.6955	POM = 1.8 × POC	Harms et al. (2021)
277	04-03	69.4952	-23.8643	2017	695	2798	3493	1.07	POM = 1.8 × POC	Harms et al. (2021)
277	04-03	69.4952	-23.8643	2018	695	2798	3493	1.7554	POM = 1.8 × POC	Harms et al. (2021)
277	04-03	69.4952	-23.8643	2017	2931	562	3493	0.358	POM = 1.8 × POC	Harms et al. (2021)
277	04-03	69.4952	-23.8643	2018	2931	562	3493	0.2673	POM = 1.8 × POC	Harms et al. (2021)
277	04-03	69.4952	-23.8643	2017	3465	28	3493	0.818	POM = 1.8 × POC	Harms et al. (2021)
277	04-03	69.4952	-23.8643	2018	3465	28	3493	0.5854	POM = 1.8 × POC	Harms et al. (2021)
278	05-01	69.9998	-25.3301	2014	2579	531	3110	0.64	POM = 1.8 × POC	Harms et al. (2021)
278	05-01	69.9998	-25.3301	2015	2579	531	3110	0.4267	POM = 1.8 × POC	Harms et al. (2021)
279	07-01	70.8445	-26.0436	2017	3479	531	4010	0.672	POM = 1.8 × POC	Harms et al. (2021)
279	07-01	70.8445	-26.0436	2018	3479	531	4010	0.476	POM = 1.8 × POC	Harms et al. (2021)
280	12-01	73.8892	-27.804	2017	3439	531	3970	0.5225	POM = 1.8 × POC	Harms et al. (2021)
281	12-01	72.3413	-26.8992	2017	2869	531	3400	0.41	POM = 1.8 × POC	Harms et al. (2021)
282	PTIV1A1	25.1	35.8	2001	1700	123	1823	1.4861	sediment trap	Triantaphyllou et al. (2004)
282	PTIV1B1	25.1	35.8	2001	500	1323	1823	4.0186	sediment trap	Triantaphyllou et al. (2004)
282	PTV1A10	25.1	35.8	2002	1700	123	1823	0.9263	sediment trap	Triantaphyllou et al. (2004)
282	PTV1B10	25.1	35.8	2002	500	1323	1823	1.1666	sediment trap	Triantaphyllou et al. (2004)
283	AII5	8.5166	42.7333	1987	200	1957	2157	19.17	sediment trap	Marty et al. (1994)
284	94-4	173.017	-77.0166	1994	50	387	437	115.04	sediment trap	Asper and Smith (1999)
285	94-5	173	-75	1994	50	483	533	193	sediment trap	Asper and Smith (1999)
286	94-6	173	-76.1	1994	50	539	589	103.275	sediment trap	Asper and Smith (1999)
287	95-2	170.133	-76.0833	1995	75	546	621	169.05	sediment trap	Asper and Smith (1999)
287	95-4	177.1	-76.0833	1996	50	351	401	162.8	sediment trap	Asper and Smith (1999)
287	95-5	165	-76.0833	1996	50	769	819	187.444	sediment trap	Asper and Smith (1999)
288	M1 U	-23	12	2012	1150	3850	5000	8.4444	POM = 1.8 × POC	Korte et al. (2017)
289	M2 L	-37.82	13.81	2012	3490	1300	4790	2.1667	POM = 1.8 × POC	Korte et al. (2017)
289	M2 U	-37.82	13.81	2012	1235	3555	4790	2.5	POM = 1.8 × POC	Korte et al. (2017)
290	M3 L	-38.63	12.39	2012	3540	1100	4640	3.2778	POM = 1.8 × POC	Korte et al. (2017)
291	M4 L	-49.19	12.06	2012	3370	1300	4670	3.1667	POM = 1.8 × POC	Korte et al. (2017)
291	M4 U	-49.19	12.06	2012	1130	3540	4670	5.9444	POM = 1.8 × POC	Korte et al. (2017)
292	M5 L	-57.04	12.02	2012	3520	880	4400	3.6667	sediment trap	Korte et al. (2017)
293	NESTOR	21.4822	36.5493	2007	4300	200	4500	0.9843	sediment trap	Theodosi et al. (2013)
293	NESTOR	21.4822	36.5493	2008	4300	200	4500	1.2401	sediment trap	Theodosi et al. (2013)
294	NESTOR	21.47	36.55	2007	700	3800	4500	0.7545	sediment trap	Theodosi et al. (2013)
294	NESTOR	21.47	36.55	2008	700	3800	4500	2.8346	sediment trap	Theodosi et al. (2013)
294	NESTOR	21.47	36.55	2007	1200	3300	4500	1.2274	sediment trap	Theodosi et al. (2013)
294	NESTOR	21.47	36.55	2008	1200	3300	4500	2.0077	sediment trap	Theodosi et al. (2013)
294	NESTOR	21.47	36.55	2007	3200	1300	4500	0.2138	sediment trap	Theodosi et al. (2013)
294	NESTOR	21.47	36.55	2008	3200	1300	4500	0.4823	sediment trap	Theodosi et al. (2013)
294	NESTOR	21.47	36.55	2006	700	3800	4500	2.55	sediment trap	Stavrakakis et al. (2013)
294	NESTOR	21.47	36.55	2006	3200	1300	4500	1.1	sediment trap	Stavrakakis et al. (2013)
294	NESTOR	21.47	36.55	2006	4300	200	4500	1.49	sediment trap	Stavrakakis et al. (2013)
295	NAP	-162	75	2010	200	1775	1975	5.48	POM = 2.2 × POC	Onodera et al. (2015)
295	NAP	-162	75	2011	200	1775	1975	4.3125	POM = 2.2 × POC	Onodera et al. (2015)
295	NAP	-162	75	2012	200	1775	1975	6.5167	POM = 2.2 × POC	Onodera et al. (2015)
295	NAP	-162	75	2010	1350	625	1975	3.7	POM = 2.2 × POC	Onodera et al. (2015)
295	NAP	-162	75	2011	1350	625	1975	2.9917	POM = 2.2 × POC	Onodera et al. (2015)
295	NAP	-162	75	2012	1350	625	1975	3.8333	POM = 2.2 × POC	Onodera et al. (2015)
296	K4	-118.72	-73.89	2016	427	261	688	11.2333	sediment trap	Kim et al. (2019)
296	K4	-118.72	-73.89	2017	427	261	688	4.6	sediment trap	Kim et al. (2019)
297	E	-54	13.5	1977	389	4899	5288	5.35	POM = 2 × POC	Pilskaln and Honjo (1987)
297	E	-54	13.5	1977	3755	1533	5288	1.73	POM = 2 × POC	Pilskaln and Honjo (1987)
297	E	-54	13.5	1977	5068	220	5288	1.7	POM = 2 × POC	Pilskaln and Honjo (1987)
298	BA01	-71.1983	76.3266	2005	200	449	649	14.873	sediment trap	Lalande et al. (2009)
298	BA01	-71.1983	76.3266	2006	200	449	649	26.6501	sediment trap	Lalande et al. (2009)
299	BA02	-74.575	76.2683	2005	200	244	444	14.5681	sediment trap	Lalande et al. (2009)
299	BA02	-74.575	76.2683	2006	200	244	444	13.7879	sediment trap	Lalande et al. (2009)
300	CA04	-133.63	71.08	2005	200	107	307	2.5033	sediment trap	Lalande et al. (2009)
300	CA04	-133.63	71.08	2006	200	107	307	4.6942	sediment trap	Lalande et al. (2009)
301	CA08	-126.075	71.0066	2005	200	197	397	3.4572	sediment trap	Lalande et al. (2009)
301	CA08	-126.075	71.0066	2006	200	197	397	10.7609	sediment trap	Lalande et al. (2009)
302	CA18	-122.988	70.665	2006	200	340	540	3.8034	sediment trap	Lalande et al. (2009)
302	CA18	-122.988	70.665	2007	200	340	540	6.4859	sediment trap	Lalande et al. (2009)
303	M3	142.363	79.9283	2005	175	1172	1347	5.9132	sediment trap	Lalande et al. (2009)
303	M3	142.363	79.9283	2006	175	1172	1347	21.3133	sediment trap	Lalande et al. (2009)
304	C	6.0688	39.33	2001	250	2600	2850	5.9686	POM = 2 × POC	Zúñiga et al. (2007)
304	C	6.0688	39.33	2002	250	2600	2850	8.4739	POM = 2 × POC	Zúñiga et al. (2007)
304	C	6.0688	39.33	2001	1440	1410	2850	6.9655	POM = 2 × POC	Zúñiga et al. (2007)
304	C	6.0688	39.33	2002	1440	1410	2850	8.8096	POM = 2 × POC	Zúñiga et al. (2007)
304	C	6.0688	39.33	2001	2145	705	2850	3.5153	POM = 2 × POC	Zúñiga et al. (2007)
304	C	6.0688	39.33	2002	2145	705	2850	4.5517	POM = 2 × POC	Zúñiga et al. (2007)
305	K1	-117.72	-72.4	2011	400	130	530	10.7684	sediment trap	Kim et al. (2015)
306	CAST	64.6166	14.5	1992	1042	2858	3900	7	sediment trap	Balakrishnan Nair et al. (2005)
306	CAST	64.6166	14.5	1993	1042	2858	3900	6.4545	sediment trap	Balakrishnan Nair et al. (2005)
306	CAST	64.6166	14.5	1994	1042	2858	3900	6.5	sediment trap	Balakrishnan Nair et al. (2005)
306	CAST	64.6166	14.5	1992	2878	1022	3900	2	sediment trap	Balakrishnan Nair et al. (2005)
306	CAST	64.6166	14.5	1993	2878	1022	3900	3.2381	sediment trap	Balakrishnan Nair et al. (2005)
306	CAST	64.6166	14.5	1994	2878	1022	3900	5	sediment trap	Balakrishnan Nair et al. (2005)
307	EAST	69.6	15.9666	1992	1632	2059	3691	7	sediment trap	Balakrishnan Nair et al. (2005)
307	EAST	69.6	15.9666	1993	1632	2059	3691	5.3529	sediment trap	Balakrishnan Nair et al. (2005)
307	EAST	69.6	15.9666	1994	1632	2059	3691	7.5	sediment trap	Balakrishnan Nair et al. (2005)
308	WAST	60.3	16.3333	1993	919	3130	4049	15.2857	sediment trap	Balakrishnan Nair et al. (2005)
308	WAST	60.3	16.3333	1994	919	3130	4049	9.5	sediment trap	Balakrishnan Nair et al. (2005)
308	WAST	60.3	16.3333	1992	2002	2047	4049	7	sediment trap	Balakrishnan Nair et al. (2005)
308	WAST	60.3	16.3333	1993	2002	2047	4049	10	sediment trap	Balakrishnan Nair et al. (2005)
308	WAST	60.3	16.3333	1994	2002	2047	4049	9.5	sediment trap	Balakrishnan Nair et al. (2005)
308	WAST	60.3	16.3333	1992	3033	1016	4049	10	sediment trap	Balakrishnan Nair et al. (2005)
308	WAST	60.3	16.3333	1993	3033	1016	4049	8.6667	sediment trap	Balakrishnan Nair et al. (2005)
308	WAST	60.3	16.3333	1994	3033	1016	4049	8.5	sediment trap	Balakrishnan Nair et al. (2005)
309	Ea3C	-10	0.1	1991	1097	3044	4141	5.2055	sediment trap	Ziveri et al. (2007)
310	MST9-G	53	10	1992-1993	3000	1035	4035	17.8082	sediment trap	Ziveri et al. (2007)
311	SBB6-7	-120	34	1996-1997	560	50	610	94.7945	sediment trap	Ziveri et al. (2007)	strong upwelling zone
312	ISPOL site 9	-54.9	-68	2004	10	1851	1861	10.3598	sediment trap	Michels et al. (2008)
313	nearshore site	130	36.5316	2013	700	150	850	82.1167	sediment trap	Hyun Kwak et al. (2017)	lateral transport
313	nearshore site	130	36.5316	2014	700	150	850	63.6	sediment trap	Hyun Kwak et al. (2017)	lateral transport
314	offshore site	131.343	37.6333	2011	500	1700	2200	30.5667	sediment trap	Hyun Kwak et al. (2017)
314	offshore site	131.343	37.6333	2012	500	1700	2200	35.4875	sediment trap	Hyun Kwak et al. (2017)
314	offshore site	131.343	37.6333	2013	500	1700	2200	25.9386	sediment trap	Hyun Kwak et al. (2017)
314	offshore site	131.343	37.6333	2011	2000	200	2200	30.5524	sediment trap	Hyun Kwak et al. (2017)
314	offshore site	131.343	37.6333	2012	2000	200	2200	44.5	sediment trap	Hyun Kwak et al. (2017)
314	offshore site	131.343	37.6333	2013	2000	200	2200	46.5	sediment trap	Hyun Kwak et al. (2017)
315	EC1	131.45	37.33	2011	1000	1323	2323	21.1115	sediment trap	Kim et al. (2017)	lateral transport
315	EC1	131.45	37.33	2011	2280	43	2323	23.5944	sediment trap	Kim et al. (2017)	lateral transport
316	K1	-117.72	-72.4	2012	400	130	530	4	sediment trap	Kim et al. (2019)
316	K1	-117.72	-72.4	2013	400	130	530	2.4143	sediment trap	Kim et al. (2019)
317	K2	-114.97	-73.28	2012	410	420	830	4.2563	sediment trap	Kim et al. (2019)
317	K2	-114.97	-73.28	2013	410	420	830	8.72	sediment trap	Kim et al. (2019)
318	K3	-112.54	-74.19	2012	490	567	1057	1.68	sediment trap	Kim et al. (2019)
318	K3	-112.54	-74.19	2013	490	567	1057	5.9	sediment trap	Kim et al. (2019)
319	ALB1	-4.2568	36.2398	1997-1998	470	530	1000	29.04	sediment trap	Sanchez-Vidal et al. (2005)
320	DM	-158.233	74.4	2008	800	850	1650	4.739	sediment trap	Bai et al. (2019)
320	DM	-158.233	74.4	2009	800	850	1650	7.698	sediment trap	Bai et al. (2019)
321	Mooring A	169.033	-71.6833	2005	360	472	832	12.2143	sediment trap	Chiarini et al. (2019)
321	Mooring A	169.033	-71.6833	2006	770	62	832	35.6	sediment trap	Chiarini et al. (2019)
321	Mooring A	169.033	-71.6833	2008	360	472	832	6.9269	sediment trap	Chiarini et al. (2019)
322	B	175.093	-74.025	1994	380	208	588	6.869	sediment trap	Langone et al. (2000)
322	B	175.093	-74.025	1995	380	208	588	5.0909	sediment trap	Langone et al. (2000)
322	B	175.093	-74.025	1996	540	48	588	12.1386	sediment trap	Langone et al. (2000)
323	siteB	-174.985	-76.505	1990	50	519	569	51.6	sediment trap	Smith and Dunbar (1998)
323	siteB	-174.985	-76.505	1990	225	344	569	19.4672	sediment trap	Smith and Dunbar (1998)
324	NABE-48	-19.5	47.8	1989	4465	68	4533	5.5274	sediment trap	Lampitt et al. (2000)
324	NABE-48	-19.5	47.8	1990	4465	68	4533	3.691	sediment trap	Lampitt et al. (2000)
325	NABE-48	-20	48	1989	3100	1245	4345	6.9698	sediment trap	Lampitt et al. (2000)
325	NABE-48	-20	48	1990	3100	1245	4345	3.1082	sediment trap	Lampitt et al. (2000)
326	site M	76.95	-68.8	2010	460	160	620	20.3148	sediment trap	Han et al. (2019)
326	site M	76.95	-68.8	2011	460	160	620	12.8659	sediment trap	Han et al. (2019)
327	D	164.217	-75.1	1995-2000	180	818	998	2.6301	sediment trap	Frignani et al. (2003)
327	D	164.217	-75.1	1995-2000	879	119	998	2.5205	sediment trap	Frignani et al. (2003)
328	F	-177.017	-77.9833	1995-1997	423	179	602	1.5342	sediment trap	Frignani et al. (2003)
329	H	-177.6	-75.9333	1995	530	95	625	1.2877	sediment trap	Frignani et al. (2003)
330	KEO	144.417	32.3667	2014	5000	800	5800	1.6603	sediment trap	Honda et al. (2018)
330	KEO	144.417	32.3667	2015	5000	800	5800	2.7398	sediment trap	Honda et al. (2018)
330	KEO	144.417	32.3667	2016	5000	800	5800	1.9893	sediment trap	Honda et al. (2018)
331	4930	36.1166	65.6333	2007	145	110	255	10.26	sediment trap	Ilyash et al. (2013)
331	4930	36.1166	65.6333	2007	238	17	255	16.32	sediment trap	Ilyash et al. (2013)
332	SAZ-47	142.067	-46.7666	2003	500	4040	4540	6.0143	sediment trap	Wilks et al. (2017)
332	SAZ-47	142.067	-46.7666	2004	500	4040	4540	3.5182	sediment trap	Wilks et al. (2017)
332	SAZ-47	142.067	-46.7666	2003	2000	2540	4540	3.9571	sediment trap	Wilks et al. (2017)
332	SAZ-47	142.067	-46.7666	2004	2000	2540	4540	6.9175	sediment trap	Wilks et al. (2017)
333	SBB	-120	34.2	1993	540	50	590	68.1818	sediment trap	Thunell (1998)	strong upwelling zone
333	SBB	-120	34.2	1994	540	50	590	71.6667	sediment trap	Thunell (1998)	strong upwelling zone
333	SBB	-120	34.2	1995	540	50	590	77.5	sediment trap	Thunell (1998)	strong upwelling zone
333	SBB	-120	34.2	1996	540	50	590	68.8889	sediment trap	Thunell (1998)	strong upwelling zone
334	St. M	-123	34.8333	1989	3500	600	4100	12.27	sediment trap	Smith et al. (2001)
334	St. M	-123	34.8333	1990	3500	600	4100	7.497	sediment trap	Smith et al. (2001)
334	St. M	-123	34.8333	1991	3500	600	4100	5.4447	sediment trap	Smith et al. (2001)
334	St. M	-123	34.8333	1992	3500	600	4100	3.9611	sediment trap	Smith et al. (2001)
334	St. M	-123	34.8333	1993	3500	600	4100	5.4969	sediment trap	Smith et al. (2001)
334	St. M	-123	34.8333	1994	3500	600	4100	4.0144	sediment trap	Smith et al. (2001)
334	St. M	-123	34.8333	1995	3500	600	4100	2.0891	sediment trap	Smith et al. (2001)
334	St. M	-123	34.8333	1996	3500	600	4100	1.7618	sediment trap	Smith et al. (2001)
334	St. M	-123	34.8333	1998	3500	600	4100	6.7091	sediment trap	Smith et al. (2001)
334	St. M	-123	34.8333	1989	4050	50	4100	8.4	sediment trap	Smith et al. (2001)
334	St. M	-123	34.8333	1990	4050	50	4100	7.5785	sediment trap	Smith et al. (2001)
334	St. M	-123	34.8333	1991	4050	50	4100	8.5903	sediment trap	Smith et al. (2001)
334	St. M	-123	34.8333	1992	4050	50	4100	2.7728	sediment trap	Smith et al. (2001)
334	St. M	-123	34.8333	1993	4050	50	4100	5.1306	sediment trap	Smith et al. (2001)
334	St. M	-123	34.8333	1994	4050	50	4100	6.6419	sediment trap	Smith et al. (2001)
334	St. M	-123	34.8333	1995	4050	50	4100	2.9039	sediment trap	Smith et al. (2001)
334	St. M	-123	34.8333	1996	4050	50	4100	1.4214	sediment trap	Smith et al. (2001)
334	St. M	-123	34.8333	1997	4050	50	4100	5.044	sediment trap	Smith et al. (2001)
334	St. M	-123	34.8333	1998	4050	50	4100	4.1263	sediment trap	Smith et al. (2001)
335	SAZ-47	142.07	-46.76	1997	1060	3480	4540	3.9117	sediment trap	Trull et al. (2001)
335	SAZ-47	142.07	-46.76	1998	1060	3480	4540	8.4488	sediment trap	Trull et al. (2001)
335	SAZ-47	142.07	-46.76	1997	2050	2490	4540	3.482	sediment trap	Trull et al. (2001)
335	SAZ-47	142.07	-46.76	1998	2050	2490	4540	10.8375	sediment trap	Trull et al. (2001)
335	SAZ-47	142.07	-46.76	1997	3850	690	4540	2.14	sediment trap	Trull et al. (2001)
335	SAZ-47	142.07	-46.76	1998	3850	690	4540	6.1489	sediment trap	Trull et al. (2001)
336	SAZ-51	141.74	-51	1997	3080	700	3780	4.3725	sediment trap	Trull et al. (2001)
336	SAZ-51	141.74	-51	1998	3080	700	3780	2.8011	sediment trap	Trull et al. (2001)
337	SAZ-54	141.76	-53.75	1997	830	1450	2280	2.52	sediment trap	Trull et al. (2001)
337	SAZ-54	141.76	-53.75	1998	830	1450	2280	5.7422	sediment trap	Trull et al. (2001)
337	SAZ-54	141.76	-53.75	1997	1580	700	2280	2.3	sediment trap	Trull et al. (2001)
337	SAZ-54	141.76	-53.75	1998	1580	700	2280	2.3867	sediment trap	Trull et al. (2001)
338	MS-7b	-178	-76.5	1996	206	375	581	1.7787	sediment trap	Collier et al. (2000)
338	MS-7b	-178	-76.5	1997	206	375	581	13.4182	sediment trap	Collier et al. (2000)
339	T0-2	139.073	-61.023	1999	110	4201	4311	146.087	sediment trap	Nodder and Waite (2001)
339	T0-2	139.073	-61.023	1999	310	4001	4311	73.03	sediment trap	Nodder and Waite (2001)
340	T11-13_BC	140.779	-61.033	1999	310	3981	4291	73.535	sediment trap	Nodder and Waite (2001)
341	T11-13_HI	140.501	-61.037	1999	310	4073	4383	74.175	sediment trap	Nodder and Waite (2001)
342	T11-13_JA	140.97	-60.864	1999	110	4159	4269	78.4567	sediment trap	Nodder and Waite (2001)
342	T11-13_JA	140.97	-60.864	1999	310	3959	4269	38.15	sediment trap	Nodder and Waite (2001)
343	T7-9_BC	140.02	-60.893	1999	310	4019	4329	52.68	sediment trap	Nodder and Waite (2001)
344	T7-9_J	140	-60.895	1999	110	4213	4323	151.297	sediment trap	Nodder and Waite (2001)
345	AT_II-119/4_A	-19.927	47.095	1989	150	4363	4513	86.4	sediment trap	https://doi.org/10.1594/PANGAEA.112905
345	AT_II-119/4_A	-19.927	47.095	1989	300	4213	4513	21.36	sediment trap	https://doi.org/10.1594/PANGAEA.112905
345	AT_II-119/4_A	-19.927	47.095	1989	1500	3013	4513	10.56	sediment trap	https://doi.org/10.1594/PANGAEA.112905
345	AT_II-119/4_A	-19.927	47.095	1989	300	4213	4513	21.36	sediment trap	https://doi.org/10.1594/PANGAEA.112905
345	AT_II-119/4_A	-19.927	47.095	1989	1500	3013	4513	10.56	sediment trap	https://doi.org/10.1594/PANGAEA.112905
346	BAF89/3_FTRAP1	-47.14	40.69	1989	150	3397	3547	259	sediment trap	https://doi.org/10.1594/PANGAEA.70440
346	BAF89/3_FTRAP1	-47.14	40.69	1989	250	3297	3547	97	sediment trap	https://doi.org/10.1594/PANGAEA.70440
346	BAF89/3_FTRAP1	-47.14	40.69	1989	150	4447	4597	259	sediment trap	https://doi.org/10.1594/PANGAEA.70440
346	BAF89/3_FTRAP1	-47.14	40.69	1989	250	4347	4597	97	sediment trap	https://doi.org/10.1594/PANGAEA.70440
347	BAF89/3_FTRAP2	-41.37	44.94	1989	150	1250	1400	159	sediment trap	https://doi.org/10.1594/PANGAEA.70446
347	BAF89/3_FTRAP2	-41.37	44.94	1989	500	900	1400	78	sediment trap	https://doi.org/10.1594/PANGAEA.70446
347	BAF89/3_FTRAP2	-41.37	44.94	1989	150	1250	1400	159	sediment trap	https://doi.org/10.1594/PANGAEA.70446
347	BAF89/3_FTRAP2	-41.37	44.94	1989	500	900	1400	78	sediment trap	https://doi.org/10.1594/PANGAEA.70446
348	CARIACO	-64.6667	10.5	2003	152	1248	1400	55.4333	sediment trap	Thunell et al. (2000, Thunell et al. (2007)
348	CARIACO	-64.6667	10.5	2004	152	1248	1400	81.1417	sediment trap	Thunell et al. (2000, Thunell et al. (2007)
348	CARIACO	-64.6667	10.5	2005	152	1248	1400	36.524	sediment trap	Thunell et al. (2000, Thunell et al. (2007)
348	CARIACO	-64.6667	10.5	2006	152	1248	1400	40.8963	sediment trap	Thunell et al. (2000, Thunell et al. (2007)
348	CARIACO	-64.6667	10.5	2007	152	1248	1400	75.2952	sediment trap	Thunell et al. (2000, Thunell et al. (2007)
348	CARIACO	-64.6667	10.5	2008	152	1248	1400	58.5692	sediment trap	Thunell et al. (2000, Thunell et al. (2007)
348	CARIACO	-64.6667	10.5	2009	152	1248	1400	39.5846	sediment trap	Thunell et al. (2000, Thunell et al. (2007)
348	CARIACO	-64.6667	10.5	2010	152	1248	1400	44.4286	sediment trap	Thunell et al. (2000, Thunell et al. (2007)
348	CARIACO	-64.6667	10.5	1995	225	1175	1400	27.9167	sediment trap	Thunell et al. (2000, Thunell et al. (2007)
348	CARIACO	-64.6667	10.5	1997	225	1175	1400	39.0735	sediment trap	Thunell et al. (2000, Thunell et al. (2007)
348	CARIACO	-64.6667	10.5	1998	225	1175	1400	39.852	sediment trap	Thunell et al. (2000, Thunell et al. (2007)
348	CARIACO	-64.6667	10.5	1999	225	1175	1400	37.9818	sediment trap	Thunell et al. (2000, Thunell et al. (2007)
348	CARIACO	-64.6667	10.5	2000	225	1175	1400	53.314	sediment trap	Thunell et al. (2000, Thunell et al. (2007)
348	CARIACO	-64.6667	10.5	2001	225	1175	1400	57.9862	sediment trap	Thunell et al. (2000, Thunell et al. (2007)
348	CARIACO	-64.6667	10.5	2002	225	1175	1400	49.5846	sediment trap	Thunell et al. (2000, Thunell et al. (2007)
348	CARIACO	-64.6667	10.5	2003	225	1175	1400	48.1333	sediment trap	Thunell et al. (2000, Thunell et al. (2007)
348	CARIACO	-64.6667	10.5	2004	225	1175	1400	46.7642	sediment trap	Thunell et al. (2000, Thunell et al. (2007)
348	CARIACO	-64.6667	10.5	2005	225	1175	1400	37.9846	sediment trap	Thunell et al. (2000, Thunell et al. (2007)
348	CARIACO	-64.6667	10.5	2006	225	1175	1400	45.6779	sediment trap	Thunell et al. (2000, Thunell et al. (2007)
348	CARIACO	-64.6667	10.5	2007	225	1175	1400	45.5877	sediment trap	Thunell et al. (2000, Thunell et al. (2007)
348	CARIACO	-64.6667	10.5	2008	225	1175	1400	43.5698	sediment trap	Thunell et al. (2000, Thunell et al. (2007)
348	CARIACO	-64.6667	10.5	2009	225	1175	1400	42.7261	sediment trap	Thunell et al. (2000, Thunell et al. (2007)
348	CARIACO	-64.6667	10.5	2010	225	1175	1400	43.664	sediment trap	Thunell et al. (2000, Thunell et al. (2007)
348	CARIACO	-64.6667	10.5	1995	1210	190	1400	20.025	sediment trap	Thunell et al. (2000, Thunell et al. (2007)	strong upwelling zone
348	CARIACO	-64.6667	10.5	1996	1210	190	1400	21.4231	sediment trap	Thunell et al. (2000, Thunell et al. (2007)	strong upwelling zone
348	CARIACO	-64.6667	10.5	1997	1210	190	1400	27.888	sediment trap	Thunell et al. (2000, Thunell et al. (2007)	strong upwelling zone
348	CARIACO	-64.6667	10.5	1998	1210	190	1400	26.65	sediment trap	Thunell et al. (2000, Thunell et al. (2007)	strong upwelling zone
348	CARIACO	-64.6667	10.5	1999	1210	190	1400	22.8808	sediment trap	Thunell et al. (2000, Thunell et al. (2007)	strong upwelling zone
348	CARIACO	-64.6667	10.5	2000	1210	190	1400	36.3267	sediment trap	Thunell et al. (2000, Thunell et al. (2007)	strong upwelling zone
348	CARIACO	-64.6667	10.5	2001	1210	190	1400	32.5917	sediment trap	Thunell et al. (2000, Thunell et al. (2007)	strong upwelling zone
348	CARIACO	-64.6667	10.5	2002	1210	190	1400	30.2955	sediment trap	Thunell et al. (2000, Thunell et al. (2007)	strong upwelling zone
348	CARIACO	-64.6667	10.5	2003	1210	190	1400	25.9917	sediment trap	Thunell et al. (2000, Thunell et al. (2007)	strong upwelling zone
348	CARIACO	-64.6667	10.5	2004	1210	190	1400	24.7435	sediment trap	Thunell et al. (2000, Thunell et al. (2007)	strong upwelling zone
348	CARIACO	-64.6667	10.5	2005	1210	190	1400	23.1043	sediment trap	Thunell et al. (2000, Thunell et al. (2007)	strong upwelling zone
348	CARIACO	-64.6667	10.5	2006	1210	190	1400	26.0727	sediment trap	Thunell et al. (2000, Thunell et al. (2007)	strong upwelling zone
348	CARIACO	-64.6667	10.5	2008	1210	190	1400	19.2538	sediment trap	Thunell et al. (2000, Thunell et al. (2007)	strong upwelling zone
348	CARIACO	-64.6667	10.5	2009	1210	190	1400	14.94	sediment trap	Thunell et al. (2000, Thunell et al. (2007)	strong upwelling zone
348	CARIACO	-64.6667	10.5	2010	1210	190	1400	18.7	sediment trap	Thunell et al. (2000, Thunell et al. (2007)	strong upwelling zone
348	CARIACO	-64.6667	10.5	2003	152	1248	1400	55.4333	sediment trap	Thunell et al. (2000, Thunell et al. (2007)
348	CARIACO	-64.6667	10.5	2004	152	1248	1400	81.1417	sediment trap	Thunell et al. (2000, Thunell et al. (2007)
348	CARIACO	-64.6667	10.5	2005	152	1248	1400	36.524	sediment trap	Thunell et al. (2000, Thunell et al. (2007)
348	CARIACO	-64.6667	10.5	2006	152	1248	1400	40.8963	sediment trap	Thunell et al. (2000, Thunell et al. (2007)
348	CARIACO	-64.6667	10.5	2007	152	1248	1400	75.2952	sediment trap	Thunell et al. (2000, Thunell et al. (2007)
348	CARIACO	-64.6667	10.5	2008	152	1248	1400	58.5692	sediment trap	Thunell et al. (2000, Thunell et al. (2007)
348	CARIACO	-64.6667	10.5	2009	152	1248	1400	39.5846	sediment trap	Thunell et al. (2000, Thunell et al. (2007)
348	CARIACO	-64.6667	10.5	2010	152	1248	1400	44.4286	sediment trap	Thunell et al. (2000, Thunell et al. (2007)
348	CARIACO	-64.6667	10.5	1995	225	1175	1400	27.9167	sediment trap	Thunell et al. (2000, Thunell et al. (2007)
348	CARIACO	-64.6667	10.5	1997	225	1175	1400	39.0735	sediment trap	Thunell et al. (2000, Thunell et al. (2007)
348	CARIACO	-64.6667	10.5	1998	225	1175	1400	39.852	sediment trap	Thunell et al. (2000, Thunell et al. (2007)
348	CARIACO	-64.6667	10.5	1999	225	1175	1400	37.9818	sediment trap	Thunell et al. (2000, Thunell et al. (2007)
348	CARIACO	-64.6667	10.5	2000	225	1175	1400	53.314	sediment trap	Thunell et al. (2000, Thunell et al. (2007)
348	CARIACO	-64.6667	10.5	2001	225	1175	1400	57.9862	sediment trap	Thunell et al. (2000, Thunell et al. (2007)
348	CARIACO	-64.6667	10.5	2002	225	1175	1400	49.5846	sediment trap	Thunell et al. (2000, Thunell et al. (2007)
348	CARIACO	-64.6667	10.5	2003	225	1175	1400	48.1333	sediment trap	Thunell et al. (2000, Thunell et al. (2007)
348	CARIACO	-64.6667	10.5	2004	225	1175	1400	46.7642	sediment trap	Thunell et al. (2000, Thunell et al. (2007)
348	CARIACO	-64.6667	10.5	2005	225	1175	1400	37.9846	sediment trap	Thunell et al. (2000, Thunell et al. (2007)
348	CARIACO	-64.6667	10.5	2006	225	1175	1400	45.6779	sediment trap	Thunell et al. (2000, Thunell et al. (2007)
348	CARIACO	-64.6667	10.5	2007	225	1175	1400	45.5877	sediment trap	Thunell et al. (2000, Thunell et al. (2007)
348	CARIACO	-64.6667	10.5	2008	225	1175	1400	43.5698	sediment trap	Thunell et al. (2000, Thunell et al. (2007)
348	CARIACO	-64.6667	10.5	2009	225	1175	1400	42.7261	sediment trap	Thunell et al. (2000, Thunell et al. (2007)
348	CARIACO	-64.6667	10.5	2010	225	1175	1400	43.664	sediment trap	Thunell et al. (2000, Thunell et al. (2007)
348	CARIACO	-64.6667	10.5	1995	1210	190	1400	20.025	sediment trap	Thunell et al. (2000, Thunell et al. (2007)	strong upwelling zone
348	CARIACO	-64.6667	10.5	1996	1210	190	1400	21.4231	sediment trap	Thunell et al. (2000, Thunell et al. (2007)	strong upwelling zone
348	CARIACO	-64.6667	10.5	1997	1210	190	1400	27.888	sediment trap	Thunell et al. (2000, Thunell et al. (2007)	strong upwelling zone
348	CARIACO	-64.6667	10.5	1998	1210	190	1400	26.65	sediment trap	Thunell et al. (2000, Thunell et al. (2007)	strong upwelling zone
348	CARIACO	-64.6667	10.5	1999	1210	190	1400	22.8808	sediment trap	Thunell et al. (2000, Thunell et al. (2007)	strong upwelling zone
348	CARIACO	-64.6667	10.5	2000	1210	190	1400	36.3267	sediment trap	Thunell et al. (2000, Thunell et al. (2007)	strong upwelling zone
348	CARIACO	-64.6667	10.5	2001	1210	190	1400	32.5917	sediment trap	Thunell et al. (2000, Thunell et al. (2007)	strong upwelling zone
348	CARIACO	-64.6667	10.5	2002	1210	190	1400	30.2955	sediment trap	Thunell et al. (2000, Thunell et al. (2007)	strong upwelling zone
348	CARIACO	-64.6667	10.5	2003	1210	190	1400	25.9917	sediment trap	Thunell et al. (2000, Thunell et al. (2007)	strong upwelling zone
348	CARIACO	-64.6667	10.5	2004	1210	190	1400	24.7435	sediment trap	Thunell et al. (2000, Thunell et al. (2007)	strong upwelling zone
348	CARIACO	-64.6667	10.5	2005	1210	190	1400	23.1043	sediment trap	Thunell et al. (2000, Thunell et al. (2007)	strong upwelling zone
348	CARIACO	-64.6667	10.5	2006	1210	190	1400	26.0727	sediment trap	Thunell et al. (2000, Thunell et al. (2007)	strong upwelling zone
348	CARIACO	-64.6667	10.5	2008	1210	190	1400	19.2538	sediment trap	Thunell et al. (2000, Thunell et al. (2007)	strong upwelling zone
348	CARIACO	-64.6667	10.5	2009	1210	190	1400	14.94	sediment trap	Thunell et al. (2000, Thunell et al. (2007)	strong upwelling zone
348	CARIACO	-64.6667	10.5	2010	1210	190	1400	18.7	sediment trap	Thunell et al. (2000, Thunell et al. (2007)	strong upwelling zone
349	CB3	-20.672	21.138	1990	730	3364	4094	6.7477	sediment trap	https://doi.org/10.1594/PANGAEA.264497
349	CB3	-20.672	21.138	1991	730	3364	4094	19.1783	sediment trap	https://doi.org/10.1594/PANGAEA.264497
349	CB3	-20.672	21.138	1990	3557	537	4094	5.2008	sediment trap	https://doi.org/10.1594/PANGAEA.264497
349	CB3	-20.672	21.138	1991	3557	537	4094	8.29	sediment trap	https://doi.org/10.1594/PANGAEA.264497
349	CB3	-20.672	21.138	1990	730	3364	4094	6.7477	sediment trap	https://doi.org/10.1594/PANGAEA.264497
349	CB3	-20.672	21.138	1991	730	3364	4094	19.1783	sediment trap	https://doi.org/10.1594/PANGAEA.264497
349	CB3	-20.672	21.138	1990	3557	537	4094	5.2008	sediment trap	https://doi.org/10.1594/PANGAEA.264497
349	CB3	-20.672	21.138	1991	3557	537	4094	8.29	sediment trap	https://doi.org/10.1594/PANGAEA.264497
350	CB4	-20.687	21.145	2007	1256	2852	4108	76.8	sediment trap	https://doi.org/10.1594/PANGAEA.745509
351	CB9	-20.703	21.253	1998	3580	541	4121	6.2567	sediment trap	https://doi.org/10.1594/PANGAEA.319950
351	CB9	-20.703	21.253	1999	3580	541	4121	6.0691	sediment trap	https://doi.org/10.1594/PANGAEA.319950
352	DYF	7.252	43.428	1987	90	2021	2111	4.6	sediment trap	https://doi.org/10.1594/PANGAEA.183709
352	DYF	7.252	43.428	1988	90	2021	2111	15.5867	sediment trap	https://doi.org/10.1594/PANGAEA.183713
352	DYF	7.252	43.428	1989	90	2021	2111	8.83	sediment trap	https://doi.org/10.1594/PANGAEA.183715
353	DYNAPROC	7.863	43.42	1995	200	2400	2600	17.7604	sediment trap	https://doi.org/10.1594/PANGAEA.185222
353	DYNAPROC	7.863	43.42	1995	1000	1600	2600	1.3165	sediment trap	https://doi.org/10.1594/PANGAEA.185222
354	EA1	-11.25	3.167	1991	984	3540	4524	10.1155	sediment trap	https://doi.org/10.1594/PANGAEA.264504
355	EA2	-11.25	1.8	1991	953	3446	4399	10.8275	sediment trap	https://doi.org/10.1594/PANGAEA.264505
356	EA3	-10.767	-0.083	1991	1097	3044	4141	5.25	sediment trap	https://doi.org/10.1594/PANGAEA.264506
357	EA4	-10.1	-2.183	1991	1068	2838	3906	6.9792	sediment trap	https://doi.org/10.1594/PANGAEA.264507
358	FEVI1	4.347	79.028	2000	300	2223	2523	6.4175	sediment trap	https://doi.org/10.1594/PANGAEA.714840
358	FEVI1	4.347	79.028	2001	300	2223	2523	4.675	sediment trap	https://doi.org/10.1594/PANGAEA.714840
359	FEVI2	4.355	79.025	2001	300	2223	2523	4.4911	sediment trap	https://doi.org/10.1594/PANGAEA.714841
359	FEVI2	4.355	79.025	2002	300	2223	2523	1.5	sediment trap	https://doi.org/10.1594/PANGAEA.714841
360	FEVI3	4.33	79.017	2002	300	2237	2537	2.913	sediment trap	https://doi.org/10.1594/PANGAEA.714842
360	FEVI3	4.33	79.017	2003	300	2237	2537	5.955	sediment trap	https://doi.org/10.1594/PANGAEA.714842
360	FEVI3	4.33	79.017	2002	2330	207	2537	5.17	sediment trap	https://doi.org/10.1594/PANGAEA.757777
360	FEVI3	4.33	79.017	2003	2330	207	2537	10.2556	sediment trap	https://doi.org/10.1594/PANGAEA.757777
361	FEVI4	4.457	78.999	2003	300	2247	2547	6.067	sediment trap	https://doi.org/10.1594/PANGAEA.714843
362	FEVI7	4.344	79.016	2004	300	2223	2523	12.8727	sediment trap	https://doi.org/10.1594/PANGAEA.714844
362	FEVI7	4.344	79.016	2005	300	2223	2523	4.5129	sediment trap	https://doi.org/10.1594/PANGAEA.714844
363	GBN3	-11.133	1.8	1989	853	3476	4329	8.8765	sediment trap	https://doi.org/10.1594/PANGAEA.357371
363	GBN3	-11.133	1.8	1990	853	3476	4329	5.1	sediment trap	https://doi.org/10.1594/PANGAEA.357371
363	GBN3	-11.133	1.8	1989	3921	408	4329	6.3588	sediment trap	https://doi.org/10.1594/PANGAEA.357371
363	GBN3	-11.133	1.8	1990	3921	408	4329	3.1	sediment trap	https://doi.org/10.1594/PANGAEA.357371
364	IRM_1	-38.864	59.346	2003	2750	259	3009	1.1986	sediment trap	https://doi.org/10.1594/PANGAEA.753860
364	IRM_1	-38.864	59.346	2004	2750	259	3009	1.0254	sediment trap	https://doi.org/10.1594/PANGAEA.753860
365	IRM_3	-39.658	59.248	2005	2750	251	3001	1.5271	sediment trap	https://doi.org/10.1594/PANGAEA.753860
365	IRM_3	-39.658	59.248	2006	2750	251	3001	1.5755	sediment trap	https://doi.org/10.1594/PANGAEA.753860
365	IRM_4	-39.658	59.248	2007	2750	251	3001	1.9422	sediment trap	https://doi.org/10.1594/PANGAEA.753860
366	JM10_DRIFT2	16.774	69.805	1995	20	261	281	180.78	sediment trap	https://doi.org/10.1594/PANGAEA.218086
366	JM10_DRIFT2	16.774	69.805	1995	20	261	281	180.78	sediment trap	https://doi.org/10.1594/PANGAEA.218086
367	CI7	-15.45	29.1883	1996	500	3110	3610	2.29	sediment trap	Neuer et al. (2002)
367	CI7	-15.45	29.1883	1997	500	3110	3610	2.6644	sediment trap	Neuer et al. (2002)
368	LP1	-17.9543	29.7622	1997	900	3427	4327	2.1465	sediment trap	Neuer et al. (2002)
368	LP1	-17.9543	29.7622	1997	3800	527	4327	1.6167	sediment trap	Neuer et al. (2002)
369	KERFIX	68.4167	-50.6667	1993	200	1300	1500	2.2175	sediment trap	Jeandel et al. (1998)
369	KERFIX	68.4167	-50.6667	1994	200	1300	1500	2.3296	sediment trap	Jeandel et al. (1998)
370	CASTD	64.72	14.51	1986	2944	976	3920	6.1746	sediment trap	Rixen et al. (2019)
370	CASTD	64.72	14.51	1987	2944	976	3920	6.4083	sediment trap	Rixen et al. (2019)
370	CASTD	64.72	14.51	1988	2944	976	3920	7.7794	sediment trap	Rixen et al. (2019)
370	CASTD	64.72	14.51	1989	2944	976	3920	3.3992	sediment trap	Rixen et al. (2019)
370	CASTD	64.72	14.51	1990	2944	976	3920	0.7969	sediment trap	Rixen et al. (2019)
370	CASTD	64.72	14.51	1992	2944	976	3920	5.1598	sediment trap	Rixen et al. (2019)
370	CASTD	64.72	14.51	1993	2944	976	3920	6.383	sediment trap	Rixen et al. (2019)
370	CASTD	64.72	14.51	1994	2944	976	3920	6.5166	sediment trap	Rixen et al. (2019)
370	CASTD	64.72	14.51	1995	2944	976	3920	10.8415	sediment trap	Rixen et al. (2019)
370	CASTD	64.72	14.51	1996	2944	976	3920	6.5993	sediment trap	Rixen et al. (2019)
370	CASTD	64.72	14.51	1997	2944	976	3920	6.4305	sediment trap	Rixen et al. (2019)
371	CBBT-N	84.41	13.14	1987	2261	1005	3266	6.7752	sediment trap	Rixen et al. (2019)
371	CBBT-N	84.41	13.14	1988	2261	1005	3266	7.7202	sediment trap	Rixen et al. (2019)
371	CBBT-N	84.41	13.14	1989	2261	1005	3266	8.8753	sediment trap	Rixen et al. (2019)
371	CBBT-N	84.41	13.14	1990	2261	1005	3266	9.5567	sediment trap	Rixen et al. (2019)
371	CBBT-N	84.41	13.14	1991	2261	1005	3266	8.0836	sediment trap	Rixen et al. (2019)
371	CBBT-N	84.41	13.14	1993	2261	1005	3266	7.085	sediment trap	Rixen et al. (2019)
372	CBBT-S	84.43	11.03	1992	2527	935	3462	5.6647	sediment trap	Rixen et al. (2019)
373	EAST	68.73	15.57	1986	2870	921	3791	8.1741	sediment trap	Rixen et al. (2019)
373	EAST	68.73	15.57	1987	2870	921	3791	6.8262	sediment trap	Rixen et al. (2019)
373	EAST	68.73	15.57	1988	2870	921	3791	4.6099	sediment trap	Rixen et al. (2019)
373	EAST	68.73	15.57	1989	2870	921	3791	6.9057	sediment trap	Rixen et al. (2019)
373	EAST	68.73	15.57	1990	2870	921	3791	5.584	sediment trap	Rixen et al. (2019)
373	EAST	68.73	15.57	1991	2870	921	3791	7.0093	sediment trap	Rixen et al. (2019)
373	EAST	68.73	15.57	1992	2870	921	3791	3.9732	sediment trap	Rixen et al. (2019)
373	EAST	68.73	15.57	1993	2870	921	3791	3.953	sediment trap	Rixen et al. (2019)
373	EAST	68.73	15.57	1994	2870	921	3791	7.5015	sediment trap	Rixen et al. (2019)
373	EAST	68.73	15.57	1997	2870	921	3791	5.7128	sediment trap	Rixen et al. (2019)
374	EIOT	77.78	3.56	1995	2374	1026	3400	5.9012	sediment trap	Rixen et al. (2019)
374	EIOT	77.78	3.56	1996	2374	1026	3400	3.2828	sediment trap	Rixen et al. (2019)
374	EIOT	77.78	3.56	1997	2374	1026	3400	4.3234	sediment trap	Rixen et al. (2019)
375	EPT	65.82	24.77	1993	590	503	1093	48.1741	sediment trap	Rixen et al. (2019)
375	EPT	65.82	24.77	1994	590	503	1093	66.9668	sediment trap	Rixen et al. (2019)
375	EPT	65.82	24.77	1995	590	503	1093	25.9566	sediment trap	Rixen et al. (2019)
375	EPT	65.82	24.77	1996	590	503	1093	83.5931	sediment trap	Rixen et al. (2019)
376	JAM	108.02	-8.28	2000	2456	794	3250	12.1469	sediment trap	Rixen et al. (2019)
376	JAM	108.02	-8.28	2001	2456	794	3250	11.5089	sediment trap	Rixen et al. (2019)
376	JAM	108.02	-8.28	2002	2456	794	3250	12.9148	sediment trap	Rixen et al. (2019)
376	JAM	108.02	-8.28	2003	2456	794	3250	16.0685	sediment trap	Rixen et al. (2019)
377	NAST	65.73	19.98	1992	2478	669	3147	6.8194	sediment trap	Rixen et al. (2019)
377	NAST	65.73	19.98	1995	2478	669	3147	6.6962	sediment trap	Rixen et al. (2019)
378	NBBT-N	89.65	17.42	1987	1889	378	2267	5.8416	sediment trap	Rixen et al. (2019)
378	NBBT-N	89.65	17.42	1988	1889	378	2267	8.0064	sediment trap	Rixen et al. (2019)
378	NBBT-N	89.65	17.42	1989	1889	378	2267	8.4702	sediment trap	Rixen et al. (2019)
378	NBBT-N	89.65	17.42	1994	1889	378	2267	8.6166	sediment trap	Rixen et al. (2019)
378	NBBT-N	89.65	17.42	1995	1889	378	2267	7.0968	sediment trap	Rixen et al. (2019)
378	NBBT-N	89.65	17.42	1996	1889	378	2267	8.0908	sediment trap	Rixen et al. (2019)
378	NBBT-N	89.65	17.42	1997	1889	378	2267	5.9777	sediment trap	Rixen et al. (2019)
378	NBBT-N	89.65	17.42	1998	1889	378	2267	8.4663	sediment trap	Rixen et al. (2019)
379	NBBT-S	89.45	15.48	1990	2172	537	2709	7.0242	sediment trap	Rixen et al. (2019)
379	NBBT-S	89.45	15.48	1991	2172	537	2709	5.9945	sediment trap	Rixen et al. (2019)
379	NBBT-S	89.45	15.48	1992	2172	537	2709	5.6014	sediment trap	Rixen et al. (2019)
380	NEAST	67.84	16.93	2007	3039	506	3545	8.965	sediment trap	Rixen et al. (2019)
380	NEAST	67.84	16.93	2008	3039	506	3545	13.3908	sediment trap	Rixen et al. (2019)
381	SAST	66.08	11.6	1992	3032	1211	4243	6.1275	sediment trap	Rixen et al. (2019)
381	SAST	66.08	11.6	1993	3032	1211	4243	6.7214	sediment trap	Rixen et al. (2019)
382	SBBT	87.26	5.09	1987	2976	1019	3995	3.5303	sediment trap	Rixen et al. (2019)
382	SBBT	87.26	5.09	1988	2976	1019	3995	6.0138	sediment trap	Rixen et al. (2019)
382	SBBT	87.26	5.09	1990	2976	1019	3995	5.183	sediment trap	Rixen et al. (2019)
382	SBBT	87.26	5.09	1991	2976	1019	3995	5.6737	sediment trap	Rixen et al. (2019)
382	SBBT	87.26	5.09	1992	2976	1019	3995	4.1157	sediment trap	Rixen et al. (2019)
382	SBBT	87.26	5.09	1993	2976	1019	3995	5.7574	sediment trap	Rixen et al. (2019)
382	SBBT	87.26	5.09	1994	2976	1019	3995	7.3995	sediment trap	Rixen et al. (2019)
382	SBBT	87.26	5.09	1995	2976	1019	3995	8.1794	sediment trap	Rixen et al. (2019)
382	SBBT	87.26	5.09	1996	2976	1019	3995	5.7517	sediment trap	Rixen et al. (2019)
382	SBBT	87.26	5.09	1997	2976	1019	3995	5.4967	sediment trap	Rixen et al. (2019)
383	WAST	60.58	16.26	1986	3017	1015	4032	6.1285	sediment trap	Rixen et al. (2019)
383	WAST	60.58	16.26	1987	3017	1015	4032	8.7405	sediment trap	Rixen et al. (2019)
383	WAST	60.58	16.26	1988	3017	1015	4032	10.1609	sediment trap	Rixen et al. (2019)
383	WAST	60.58	16.26	1989	3017	1015	4032	2.0953	sediment trap	Rixen et al. (2019)
383	WAST	60.58	16.26	1990	3017	1015	4032	12.6039	sediment trap	Rixen et al. (2019)
383	WAST	60.58	16.26	1991	3017	1015	4032	9.4769	sediment trap	Rixen et al. (2019)
383	WAST	60.58	16.26	1992	3017	1015	4032	8.3621	sediment trap	Rixen et al. (2019)
383	WAST	60.58	16.26	1993	3017	1015	4032	8.609	sediment trap	Rixen et al. (2019)
383	WAST	60.58	16.26	1994	3017	1015	4032	8.8893	sediment trap	Rixen et al. (2019)
383	WAST	60.58	16.26	1995	3017	1015	4032	10.3517	sediment trap	Rixen et al. (2019)
383	WAST	60.58	16.26	1997	3017	1015	4032	11.458	sediment trap	Rixen et al. (2019)
383	WAST	60.58	16.26	1998	3017	1015	4032	10.9845	sediment trap	Rixen et al. (2019)
383	WAST	60.58	16.26	2007	3017	1015	4032	9.3171	sediment trap	Rixen et al. (2019)
383	WAST	60.58	16.26	2008	3017	1015	4032	3.1835	sediment trap	Rixen et al. (2019)
384	LOMO-2	138.9	81.068	1995	150	1560	1710	1.3614	sediment trap	Lalande et al. (2019)
384	LOMO-2	138.9	81.068	1996	150	1560	1710	4.6077	sediment trap	Lalande et al. (2019)
385	NABOS_2005	142.363	79.9286	2005	175	1175	1350	4.3067	sediment trap	Lalande et al. (2019)
385	NABOS_2005	142.363	79.9286	2006	175	1175	1350	15.6758	sediment trap	Lalande et al. (2019)
385	NABOS_2006	142.363	79.9286	2007	180	1175	1355	59.4978	sediment trap	Lalande et al. (2019)
386	NABOS_2007	159.333	79.7568	2007	260	1200	1460	0.65	sediment trap	Lalande et al. (2019)
386	NABOS_2007	159.333	79.7568	2008	260	1200	1460	1.64	sediment trap	Lalande et al. (2019)
387	FEVI3 (PS62/179-2, HGIV)	4.3295	79.0173	2002	300	2293	2593	2.913	sediment trap	Bauerfeind et al. (2009)
387	FEVI3 (PS62/179-2, HGIV)	4.3295	79.0173	2003	300	2293	2593	5.955	sediment trap	Bauerfeind et al. (2009)
388	FEVI7	4.3436	79.0165	2004	300	2284	2584	12.8727	sediment trap	Bauerfeind et al. (2009)
388	FEVI7	4.3436	79.0165	2005	300	2284	2584	4.5129	sediment trap	Bauerfeind et al. (2009)
389	PF-I	167	0	1994	120	4245	4365	45.28	sediment trap	Rodier and Le Borgne (1997)
389	PF-I	167	0	1994	230	4135	4365	43.08	sediment trap	Rodier and Le Borgne (1997)
389	PF-II	-150	0	1994	105	4330	4435	205.04	sediment trap	Rodier and Le Borgne (1997)
389	PF-II	-150	0	1994	220	4215	4435	51.82	sediment trap	Rodier and Le Borgne (1997)
390	OSP	-145	50	1989	200	4040	4240	13.6767	sediment trap	Wong et al. (1999)
390	OSP	-145	50	1990	200	4040	4240	18.4767	sediment trap	Wong et al. (1999)
390	OSP	-145	50	1993	200	4040	4240	26.7616	sediment trap	Wong et al. (1999)
390	OSP	-145	50	1983	1000	3240	4240	10.3233	sediment trap	Wong et al. (1999)
390	OSP	-145	50	1985	1000	3240	4240	8.0877	sediment trap	Wong et al. (1999)
390	OSP	-145	50	1989	1000	3240	4240	4.537	sediment trap	Wong et al. (1999)
390	OSP	-145	50	1990	1000	3240	4240	4.7671	sediment trap	Wong et al. (1999)
390	OSP	-145	50	1993	1000	3240	4240	6.5753	sediment trap	Wong et al. (1999)
390	OSP	-145	50	1982	3800	440	4240	4.9151	sediment trap	Wong et al. (1999)
390	OSP	-145	50	1984	3800	440	4240	2.2685	sediment trap	Wong et al. (1999)
390	OSP	-145	50	1985	3800	440	4240	2.2356	sediment trap	Wong et al. (1999)
390	OSP	-145	50	1986	3800	440	4240	2.8603	sediment trap	Wong et al. (1999)
390	OSP	-145	50	1987	3800	440	4240	3.0247	sediment trap	Wong et al. (1999)
390	OSP	-145	50	1988	3800	440	4240	2.5644	sediment trap	Wong et al. (1999)
390	OSP	-145	50	1989	3800	440	4240	2.2685	sediment trap	Wong et al. (1999)
390	OSP	-145	50	1990	3800	440	4240	2.3342	sediment trap	Wong et al. (1999)
390	OSP	-145	50	1993	3800	440	4240	3.5507	sediment trap	Wong et al. (1999)
391	G3	-127.638	49.65	1994	200	265	465	53.3825	sediment trap	Pena et al. (1996)
391	G3	-127.638	49.65	1995	200	265	465	43.6712	sediment trap	Pena et al. (1996)
392	J1	-127.63	49.6483	1990	200	167	367	35.8625	sediment trap	Pena et al. (1996)
393	J2	-127.645	49.635	1990	200	265	465	14.4192	sediment trap	Pena et al. (1996)
394	NJ2	-128.38	50.2766	1990	200	853	1053	31.0778	sediment trap	Pena et al. (1996)
395	O3	-127.737	49.125	1994	200	2365	2565	21.4811	sediment trap	Pena et al. (1996)
395	O4	-127.75	49.125	1995	200	2365	2565	42.6774	sediment trap	Pena et al. (1996)
396	O5/O6	-127.735	49.1183	1995	200	2365	2565	4.8529	sediment trap	Pena et al. (1996)
396	O5/O6	-127.735	49.1183	1996	200	2365	2565	21.5795	sediment trap	Pena et al. (1996)
396	O5/O6	-127.735	49.1183	1995	300	2265	2565	6.7629	sediment trap	Pena et al. (1996)
396	O5/O6	-127.735	49.1183	1996	300	2265	2565	16.13	sediment trap	Pena et al. (1996)
396	O5/O6	-127.735	49.1183	1995	1900	665	2565	4.2543	sediment trap	Pena et al. (1996)
396	O5/O6	-127.735	49.1183	1996	1900	665	2565	13.9005	sediment trap	Pena et al. (1996)
397	S3	-127.977	48.7833	1994	200	2299	2499	15.7456	sediment trap	Pena et al. (1996)
397	S3	-127.977	48.7833	1995	200	2299	2499	27.74	sediment trap	Pena et al. (1996)
398	S4	-127.833	48.785	1995	200	2377	2577	38.785	sediment trap	Pena et al. (1996)
399	PS79/086-4	-11.9895	-51.9997	2012	100	3851	3951	192	sediment trap	Roca-Martí et al. (2017)
399	PS79/086-4	-11.9895	-51.9997	2012	300	3651	3951	87.6	sediment trap	Roca-Martí et al. (2017)
400	PS79/091-3	-12.67	-51.2062	2012	100	3929	4029	204	sediment trap	Roca-Martí et al. (2017)
400	PS79/091-3	-12.67	-51.2062	2012	300	3729	4029	78	sediment trap	Roca-Martí et al. (2017)
401	PS79/098-1	-12.6662	-51.2012	2012	100	3713	3813	300	sediment trap	Roca-Martí et al. (2017)
402	PS79/100-1	-12.6665	-51.2047	2012	100	3943	4043	192	sediment trap	Roca-Martí et al. (2017)
402	PS79/100-1	-12.6665	-51.2047	2012	300	3743	4043	90	sediment trap	Roca-Martí et al. (2017)
403	PS79/114-1	-12.6537	-51.2042	2012	100	3758	3858	192	sediment trap	Roca-Martí et al. (2017)
403	PS79/114-1	-12.6537	-51.2042	2012	300	3558	3858	69.6	sediment trap	Roca-Martí et al. (2017)
404	PS79/128-1	-12.6367	-51.208	2012	120	3784	3904	156	sediment trap	Roca-Martí et al. (2017)
405	PS79/136-1	-12.6603	-51.1963	2012	120	3753	3873	132	sediment trap	Roca-Martí et al. (2017)
405	PS79/136-1	-12.6603	-51.1963	2012	320	3553	3873	75.6	sediment trap	Roca-Martí et al. (2017)
406	PS79/137-1	-12.1645	-51.0152	2012	120	3320	3440	180	sediment trap	Roca-Martí et al. (2017)
406	PS79/137-1	-12.1645	-51.0152	2012	320	3120	3440	75.6	sediment trap	Roca-Martí et al. (2017)
407	PS79/139-1	-12.9922	-51.0013	2012	120	3915	4035	276	sediment trap	Roca-Martí et al. (2017)
408	PS79/140-1	-12.6697	-51.1982	2012	120	3912	4032	156	sediment trap	Roca-Martí et al. (2017)
408	PS79/140-1	-12.6697	-51.1982	2012	320	3712	4032	103.2	sediment trap	Roca-Martí et al. (2017)
409	B	144.467	40.4333	1994	1000	6000	7000	7.068	sediment trap	Shin et al. (2002)
409	B	144.467	40.4333	1995	1000	6000	7000	5.76	sediment trap	Shin et al. (2002)
409	B	144.467	40.4333	1996	1000	6000	7000	2.5067	sediment trap	Shin et al. (2002)
409	B	144.467	40.4333	1994	4200	2800	7000	21.11	sediment trap	Shin et al. (2002)
409	B	144.467	40.4333	1995	4200	2800	7000	18.265	sediment trap	Shin et al. (2002)
409	B	144.467	40.4333	1996	4200	2800	7000	22.2525	sediment trap	Shin et al. (2002)
410	AMK36-3510	18.0673	73.7196	1995	133	150	283	4.3	sediment trap	Shin et al. (2002)
410	AMK36-3510	18.0673	73.7196	1995	268	15	283	18.4	sediment trap	Shin et al. (2002)
411	EA5	-10.2667	-4.3333	1991	948	2542	3490	6.2636	sediment trap	Lampitt and Antia (1997)
412	GBN6	-11.1383	1.7883	1990	859	3663	4522	4.875	sediment trap	Lampitt and Antia (1997)
412	GBN6	-11.1383	1.7883	1990	3965	557	4522	6.2563	sediment trap	Lampitt and Antia (1997)
412	GBN6	-11.1383	1.7883	1991	3965	557	4522	4.825	sediment trap	Lampitt and Antia (1997)
413	GBZ5	-9.925	-2.1933	1990	597	3323	3920	9.0917	sediment trap	Lampitt and Antia (1997)
413	GBZ5	-9.925	-2.1933	1991	597	3323	3920	2.65	sediment trap	Lampitt and Antia (1997)
413	GBZ5	-9.925	-2.1933	1990	3382	538	3920	7.5188	sediment trap	Lampitt and Antia (1997)
413	GBZ5	-9.925	-2.1933	1991	3382	538	3920	2.35	sediment trap	Lampitt and Antia (1997)
414	KG1	-57.5283	-62.2566	1983	494	1458	1952	55.3	sediment trap	Lampitt and Antia (1997)
414	KG1	-57.5283	-62.2566	1984	494	1458	1952	1.5125	sediment trap	Lampitt and Antia (1997)
414	KG1	-57.5283	-62.2566	1983	1588	364	1952	36.55	sediment trap	Lampitt and Antia (1997)
414	KG1	-57.5283	-62.2566	1984	1588	364	1952	0.7333	sediment trap	Lampitt and Antia (1997)
415	KG2	-57.4667	-62.3333	1984	695	955	1650	8.3	sediment trap	Lampitt and Antia (1997)
415	KG2	-57.4667	-62.3333	1985	695	955	1650	0.1286	sediment trap	Lampitt and Antia (1997)
416	KG3	-57.8333	-62.3667	1985	687	1305	1992	30.125	sediment trap	Lampitt and Antia (1997)
416	KG3	-57.8333	-62.3667	1986	687	1305	1992	0.2667	sediment trap	Lampitt and Antia (1997)
417	KN1	-12.199	-71.1283	1988	250	380	630	32.3053	sediment trap	Lampitt and Antia (1997)
418	WR4	8.96	-20.125	1991	1717	546	2263	9.895	sediment trap	Lampitt and Antia (1997)
419	D1	-74.98	75.2233	1998	250	231	481	9	sediment trap	Amiel et al. (2002)
420	D2	-73.305	76.017	1999	75	302	377	84.6	sediment trap	Amiel et al. (2002)
420	D2	-73.305	76.017	1999	341	36	377	4.8	sediment trap	Amiel et al. (2002)
421	E1	-72.66	77	1998	50	331	381	155.4	sediment trap	Amiel et al. (2002)
421	E1	-72.66	77	1999	25	356	381	103.6	sediment trap	Amiel et al. (2002)
422	E2	-73.8466	78.0233	1998	50	455	505	267.2	sediment trap	Amiel et al. (2002)
422	E2	-73.8466	78.0233	1999	75	430	505	63	sediment trap	Amiel et al. (2002)
423	N2	-74.3166	78.3583	1998	50	449	499	143.4	sediment trap	Amiel et al. (2002)
424	S2	-71.985	76.2816	1998	200	397	597	56.4	sediment trap	Amiel et al. (2002)
424	S2	-71.985	76.2816	1999	25	572	597	73	sediment trap	Amiel et al. (2002)
424	S2	-71.985	76.2816	1998	515	82	597	45.6	sediment trap	Amiel et al. (2002)
424	S2	-71.985	76.2816	1999	205	392	597	8.4	sediment trap	Amiel et al. (2002)
425	S4	-74.3883	76.283	1998	50	397	447	284.4	sediment trap	Amiel et al. (2002)
425	S4	-74.3883	76.283	1999	25	422	447	67.92	sediment trap	Amiel et al. (2002)
425	S4	-74.3883	76.283	1998	201	246	447	7.2	sediment trap	Amiel et al. (2002)
425	S4	-74.3883	76.283	1999	201	246	447	27.6	sediment trap	Amiel et al. (2002)
426	S5	-77.3416	76.4166	1998	50	241	291	315.6	sediment trap	Amiel et al. (2002)
426	S5	-77.3416	76.4166	1998	259	32	291	42	sediment trap	Amiel et al. (2002)
427	BS	12.4868	75.1963	1991	610	1440	2050	9.8475	sediment trap	Vonbodungen et al. (1995)
427	BS	12.4868	75.1963	1991	1840	210	2050	9.5949	sediment trap	Vonbodungen et al. (1995)
428	JN	138.5	42.4666	2000	1057	2585	3642	10.9804	sediment trap	Khim et al. (2018)
428	JN	138.5	42.4666	2001	1057	2585	3642	12.5349	sediment trap	Khim et al. (2018)
428	JN	138.5	42.4666	2000	3043	599	3642	3.7267	sediment trap	Khim et al. (2018)
428	JN	138.5	42.4666	2001	3043	599	3642	6.4824	sediment trap	Khim et al. (2018)
429	MS	132.345	41.24	2001	927	2497	3424	22.3048	sediment trap	Khim et al. (2018)
429	MS	132.345	41.24	2002	927	2497	3424	39.0075	sediment trap	Khim et al. (2018)
429	MS	132.345	41.24	2000	2746	678	3424	5.4196	sediment trap	Khim et al. (2018)
429	MS	132.345	41.24	2001	2746	678	3424	10.071	sediment trap	Khim et al. (2018)
429	MS	132.345	41.24	2002	2746	678	3424	13.6449	sediment trap	Khim et al. (2018)
430	JAST01	126.44	27.23	1993	463	1187	1650	0.5192	sediment trap	Honda et al. (2000)
430	JAST01	126.44	27.23	1993	1005	645	1650	4.9643	sediment trap	Honda et al. (2000)
430	JAST01	126.44	27.23	1994	1005	622	1627	6.953	sediment trap	Honda et al. (2000)
430	JAST01	126.44	27.23	1995	1005	622	1627	6.6273	sediment trap	Honda et al. (2000)
431	CB17	-20.804	21.286	2007	1204	2991	4195	10.95	sediment trap	Iversen et al. (2010)
432	CARIACO	-64.6667	10.5	1996	225	1175	1400	43.0394	sediment trap	Thunell et al. (2000)
433	CB1	-19.742	20.755	1988	2195	1451	3646	7.6732	sediment trap	Wefer and Fischer (1993)
433	CB1	-19.742	20.755	1989	2195	1451	3646	6.345	sediment trap	Wefer and Fischer (1993)
434	CB2	-20.687	21.145	1989	3502	647	4149	4.2526	sediment trap	Wefer and Fischer (1993)
434	CB2	-20.687	21.145	1990	3502	647	4149	6.025	sediment trap	Wefer and Fischer (1993)
435	GBZ4	-9.9	-2.183	1989	696	3216	3912	3.4235	sediment trap	Wefer and Fischer (1993)
435	GBZ4	-9.9	-2.183	1990	696	3216	3912	0.4333	sediment trap	Wefer and Fischer (1993)
436	PAP-I	-19.551	47.793	1989	3000	1559	4559	7.9846	sediment trap	Lampitt et al. (2001)
436	PAP-I	-19.551	47.793	1989	4500	59	4559	5.1385	sediment trap	Lampitt et al. (2001)
437	PAP-III	-19.533	47.979	1989	3000	1570	4570	4.35	sediment trap	Lampitt et al. (2001)
437	PAP-III	-19.533	47.979	1990	3000	1570	4570	1.385	sediment trap	Lampitt et al. (2001)
437	PAP-III	-19.533	47.979	1989	4500	70	4570	6.385	sediment trap	Lampitt et al. (2001)
437	PAP-III	-19.533	47.979	1990	4500	70	4570	3.1225	sediment trap	Lampitt et al. (2001)
438	PAP-V	-19.48	47.753	1990	4500	72	4572	4.0073	sediment trap	Lampitt et al. (2001)
439	PAP-XIX	-16.302	49.007	1997	1000	3874	4874	6.316	sediment trap	Lampitt et al. (2001)
439	PAP-XIX	-16.302	49.007	1997	3000	1874	4874	4.3969	sediment trap	Lampitt et al. (2001)
439	PAP-XIX	-16.302	49.007	1997	4700	174	4874	3.5346	sediment trap	Lampitt et al. (2001)
440	PAP-XX	-16.216	48.99	1997	1000	3869	4869	2.288	sediment trap	Lampitt et al. (2001)
440	PAP-XX	-16.216	48.99	1998	1000	3869	4869	0.425	sediment trap	Lampitt et al. (2001)
440	PAP-XX	-16.216	48.99	1997	3000	1869	4869	2.135	sediment trap	Lampitt et al. (2001)
440	PAP-XX	-16.216	48.99	1998	3000	1869	4869	1.25	sediment trap	Lampitt et al. (2001)
440	PAP-XX	-16.216	48.99	1997	4700	169	4869	2.665	sediment trap	Lampitt et al. (2001)
440	PAP-XX	-16.216	48.99	1998	4700	169	4869	1.27	sediment trap	Lampitt et al. (2001)
441	PAP-XXIIIa	-16.229	48.997	1998	3000	1869	4869	5.5269	sediment trap	Lampitt et al. (2001)
441	PAP-XXIIIa	-16.229	48.997	1998	4700	169	4869	4.5385	sediment trap	Lampitt et al. (2001)
442	PAP-XXV	-16.437	48.992	1998	3000	1860	4860	1.355	sediment trap	Lampitt et al. (2001)
442	PAP-XXV	-16.437	48.992	1998	4700	160	4860	1.26	sediment trap	Lampitt et al. (2001)
442	PAP-XXV	-16.437	48.992	1999	4700	160	4860	4.316	sediment trap	Lampitt et al. (2001)
443	EUMELI-MESO	-21	18.5	1991	1000	2115	3115	21.7957	sediment trap	Bory et al. (2001)
443	EUMELI-MESO	-21	18.5	1992	1000	2115	3115	7.5174	sediment trap	Bory et al. (2001)
443	EUMELI-MESO	-21	18.5	1991	2500	615	3115	7.9103	sediment trap	Bory et al. (2001)
443	EUMELI-MESO	-21	18.5	1992	2500	615	3115	5.2164	sediment trap	Bory et al. (2001)
444	EUMELI-OLIGO	-31	21	1991	1000	3600	4600	1.5788	sediment trap	Bory et al. (2001)
444	EUMELI-OLIGO	-31	21	1992	1000	3600	4600	1.8892	sediment trap	Bory et al. (2001)
444	EUMELI-OLIGO	-31	21	1991	2500	2100	4600	1.3031	sediment trap	Bory et al. (2001)
444	EUMELI-OLIGO	-31	21	1992	2500	2100	4600	1.673	sediment trap	Bory et al. (2001)
445	LOIS	-9.409	56.709	1996	1000	469	1469	6.7308	sediment trap	Lampitt et al. (2002)
445	LOIS	-9.409	56.709	1996	1400	69	1469	6.4315	sediment trap	Lampitt et al. (2002)
446	LOIS	-9.408	56.718	1995	1400	69	1469	7.51	sediment trap	Lampitt et al. (2002)
447	LOIS	-9.422	56.724	1995	1000	469	1469	6.0615	sediment trap	Lampitt et al. (2002)
447	LOIS	-9.422	56.724	1996	1000	469	1469	7.1325	sediment trap	Lampitt et al. (2002)
447	LOIS	-9.422	56.724	1995	1400	69	1469	11.1765	sediment trap	Lampitt et al. (2002)
447	LOIS	-9.422	56.724	1996	1400	69	1469	13.3967	sediment trap	Lampitt et al. (2002)
448	LOIS	-9.413	56.727	1996	1000	469	1469	5.9	sediment trap	Lampitt et al. (2002)
448	LOIS	-9.413	56.727	1996	1400	69	1469	2.788	sediment trap	Lampitt et al. (2002)
449	LOIS	-9.419	56.733	1995	1400	69	1469	5.846	sediment trap	Lampitt et al. (2002)
450	CB4	-20.687	21.145	1991	733	3375	4108	12.2975	sediment trap	Muller and Fischer (2001)
450	CB4	-20.687	21.145	1991	3562	546	4108	6.3765	sediment trap	Muller and Fischer (2001)
451	CB5	-20.682	21.143	2007	1263	2856	4119	31.3	sediment trap	Muller and Fischer (2001)
451	CB5	-20.682	21.143	1994	3587	532	4119	2.3353	sediment trap	Muller and Fischer (2001)
452	CARIACO	-64.6667	10.5	1987	455	945	1400	71.416	sediment trap	Goñi et al. (2003)
453	AT_II-119/4_B	-18.976	46.557	1989	150	4495	4645	152.4	sediment trap	Buesseler et al. (1992)
453	AT_II-119/4_B	-18.976	46.557	1989	300	4345	4645	39	sediment trap	Buesseler et al. (1992)
453	AT_II-119/4_B	-18.976	46.557	1989	1500	3145	4645	10.14	sediment trap	Buesseler et al. (1992)
454	AT_II-119/5_C	-17.938	46.369	1989	150	3839	3989	139.2	sediment trap	Buesseler et al. (1992)
454	AT_II-119/5_C	-17.938	46.369	1989	300	3689	3989	54.3	sediment trap	Buesseler et al. (1992)
454	AT_II-119/5_C	-17.938	46.369	1989	1500	2489	3989	17.4	sediment trap	Buesseler et al. (1992)
455	WCT-3	147.003	35.9965	1998	1108	4507	5615	2.1667	sediment trap	Mohiuddin et al. (2004)
455	WCT-3	147.003	35.9965	1999	1108	4507	5615	2.1481	sediment trap	Mohiuddin et al. (2004)
455	WCT-3	147.003	35.9965	1998	5081	534	5615	2.6543	sediment trap	Mohiuddin et al. (2004)
455	WCT-3	147.003	35.9965	1999	5081	534	5615	4.9786	sediment trap	Mohiuddin et al. (2004)
456	WCT-7	154.938	36.682	1999	1191	4387	5578	3.6975	sediment trap	Mohiuddin et al. (2004)
456	WCT-7	154.938	36.682	2000	1191	4387	5578	5.6905	sediment trap	Mohiuddin et al. (2004)
456	WCT-7	154.938	36.682	1999	5034	544	5578	3.381	sediment trap	Mohiuddin et al. (2004)
456	WCT-7	154.938	36.682	2000	5034	544	5578	4.1865	sediment trap	Mohiuddin et al. (2004)
457	WCT-1	136.994	24.9933	1997	4336	972	5308	0.9111	sediment trap	Mohiuddin et al. (2002)
457	WCT-1	136.994	24.9933	1998	4336	972	5308	1.2234	sediment trap	Mohiuddin et al. (2002)
457	WCT-1	136.994	24.9933	1999	4758	550	5308	1.2051	sediment trap	Mohiuddin et al. (2002)
458	WCT-1	136.994	25.0084	1997	917	3988	4905	1.0944	sediment trap	Mohiuddin et al. (2002)
458	WCT-1	136.994	25.0084	1998	917	3988	4905	1.6344	sediment trap	Mohiuddin et al. (2002)
458	WCT-1	136.994	25.0084	1998	1388	3517	4905	1.1481	sediment trap	Mohiuddin et al. (2002)
458	WCT-1	136.994	25.0084	1999	1388	3517	4905	2.904	sediment trap	Mohiuddin et al. (2002)
459	WCT-2	146.994	39.0014	1997	1371	3985	5356	3.6708	sediment trap	Mohiuddin et al. (2002)
459	WCT-2	146.994	39.0014	1998	1371	3985	5356	8.7368	sediment trap	Mohiuddin et al. (2002)
459	WCT-2	146.994	39.0014	1999	1586	3770	5356	10.0066	sediment trap	Mohiuddin et al. (2002)
460	WCT-2	147	39.0166	1997	4787	545	5332	3.15	sediment trap	Mohiuddin et al. (2002)
460	WCT-2	147	39.0166	1998	4787	545	5332	4.3653	sediment trap	Mohiuddin et al. (2002)
460	WCT-2	147	39.0166	1999	4787	545	5332	5.5921	sediment trap	Mohiuddin et al. (2002)
461	BI	11.47	75.86	1984	1700	423	2123	4.6175	sediment trap	Honjo et al. (1988)
462	FS	1.37	78.86	1984	2400	127	2527	1.308	sediment trap	Honjo et al. (1987)
462	FS	1.37	78.86	1985	2400	127	2527	0.27	sediment trap	Honjo et al. (1987)
463	GB	-6.72	74.58	1985	2823	622	3445	1.0117	sediment trap	Honjo et al. (1987)
463	GB	-6.72	74.58	1986	2823	622	3445	1.1914	sediment trap	Honjo et al. (1987)
464	LB	10	69.5	1983	2760	400	3160	3.146	sediment trap	Honjo et al. (1987)
464	LB	10	69.5	1984	2760	400	3160	1.5414	sediment trap	Honjo et al. (1987)
465	NA-1	1.1	65.52	1985	2630	428	3058	2.3633	sediment trap	Honjo et al. (1987)
465	NA-1	1.1	65.52	1986	2630	428	3058	0.9743	sediment trap	Honjo et al. (1987)
466	NABE-34	-21.037	33.807	1989	4391	692	5083	0.915	sediment trap	Honjo and Manganini (1992)
466	NABE-34	-21.037	33.807	1990	4391	692	5083	4.8714	sediment trap	Honjo and Manganini (1992)
467	NABE-34	-21.05	33.81	1989	1248	3835	5083	1.19	sediment trap	Honjo and Manganini (1992)
467	NABE-34	-21.05	33.81	1990	1248	3835	5083	6.2892	sediment trap	Honjo and Manganini (1992)
468	NABE-34	-21.008	33.822	1989	1070	4191	5261	1.631	sediment trap	Honjo and Manganini (1992)
468	NABE-34	-21.008	33.822	1989	2067	3194	5261	2.4392	sediment trap	Honjo and Manganini (1992)
468	NABE-34	-21.008	33.822	1989	4565	696	5261	1.9009	sediment trap	Honjo and Manganini (1992)
469	NABE-48	-20.875	47.715	1989	1018	3400	4418	5.6962	sediment trap	Honjo and Manganini (1992)
469	NABE-48	-20.875	47.715	1989	2018	2400	4418	5.1985	sediment trap	Honjo and Manganini (1992)
469	NABE-48	-20.875	47.715	1989	3718	700	4418	3.9708	sediment trap	Honjo and Manganini (1992)
470	NABE-48	-20.858	47.727	1989	1202	3249	4451	1.83	sediment trap	Honjo and Manganini (1992)
470	NABE-48	-20.858	47.727	1990	1202	3249	4451	3.5371	sediment trap	Honjo and Manganini (1992)
470	NABE-48	-20.858	47.727	1989	3749	702	4451	1.4917	sediment trap	Honjo and Manganini (1992)
470	NABE-48	-20.858	47.727	1990	3749	702	4451	1.2543	sediment trap	Honjo and Manganini (1992)
471	NABE-48	-20.86	47.73	1989	2200	2251	4451	1.6933	sediment trap	Honjo and Manganini (1992)
472	NB	-1.97	70	1985	2749	24	2773	1.7869	sediment trap	Honjo et al. (1987)
472	NB	-1.97	70	1986	2749	24	2773	0.03	sediment trap	Honjo et al. (1987)
473	BATS	-64	31	1988	150	4505	4655	17.85	sediment trap	JGOFS website
473	BATS	-64	31	1989	150	4505	4655	26.182	sediment trap	JGOFS website
473	BATS	-64	31	1990	150	4505	4655	22.2932	sediment trap	JGOFS website
473	BATS	-64	31	1991	150	4505	4655	19.9438	sediment trap	JGOFS website
473	BATS	-64	31	1992	150	4505	4655	19.0204	sediment trap	JGOFS website
473	BATS	-64	31	1993	150	4505	4655	17.0735	sediment trap	JGOFS website
473	BATS	-64	31	1994	150	4505	4655	24.8329	sediment trap	JGOFS website
473	BATS	-64	31	1995	150	4505	4655	22.9458	sediment trap	JGOFS website
473	BATS	-64	31	1996	150	4505	4655	27.9921	sediment trap	JGOFS website
473	BATS	-64	31	1997	150	4505	4655	25.34	sediment trap	JGOFS website
473	BATS	-64	31	1998	150	4505	4655	26.3855	sediment trap	JGOFS website
473	BATS	-64	31	1999	150	4505	4655	28.9205	sediment trap	JGOFS website
473	BATS	-64	31	2000	150	4505	4655	23.0417	sediment trap	JGOFS website
473	BATS	-64	31	2001	150	4505	4655	24.1935	sediment trap	JGOFS website
473	BATS	-64	31	2002	150	4505	4655	26.2009	sediment trap	JGOFS website
473	BATS	-64	31	2003	150	4505	4655	21.2113	sediment trap	JGOFS website
473	BATS	-64	31	2004	150	4505	4655	24.2962	sediment trap	JGOFS website
473	BATS	-64	31	2005	150	4505	4655	18.6546	sediment trap	JGOFS website
473	BATS	-64	31	2006	150	4505	4655	20.6468	sediment trap	JGOFS website
473	BATS	-64	31	2007	150	4505	4655	28.6871	sediment trap	JGOFS website
473	BATS	-64	31	2008	150	4505	4655	19.3452	sediment trap	JGOFS website
473	BATS	-64	31	2009	150	4505	4655	24.4441	sediment trap	JGOFS website
473	BATS	-64	31	2010	150	4505	4655	19.4218	sediment trap	JGOFS website
473	BATS	-64	31	2011	150	4505	4655	31.8109	sediment trap	JGOFS website
473	BATS	-64	31	2012	150	4505	4655	20.8673	sediment trap	JGOFS website
473	BATS	-64	31	2013	150	4505	4655	26.9186	sediment trap	JGOFS website
473	BATS	-64	31	2014	150	4505	4655	20.1074	sediment trap	JGOFS website
473	BATS	-64	31	2015	150	4505	4655	48.2184	sediment trap	JGOFS website
473	BATS	-64	31	2016	150	4505	4655	21.0481	sediment trap	JGOFS website
473	BATS	-64	31	1989	300	4355	4655	13.6895	sediment trap	JGOFS website
473	BATS	-64	31	1990	300	4355	4655	14.2984	sediment trap	JGOFS website
473	BATS	-64	31	1991	300	4355	4655	13.25	sediment trap	JGOFS website
473	BATS	-64	31	1992	300	4355	4655	9.8567	sediment trap	JGOFS website
473	BATS	-64	31	1993	300	4355	4655	8.4908	sediment trap	JGOFS website
473	BATS	-64	31	1994	300	4355	4655	16.2383	sediment trap	JGOFS website
473	BATS	-64	31	1995	300	4355	4655	14.5642	sediment trap	JGOFS website
473	BATS	-64	31	1996	300	4355	4655	17.0467	sediment trap	JGOFS website
473	BATS	-64	31	1997	300	4355	4655	15.015	sediment trap	JGOFS website
473	BATS	-64	31	1998	300	4355	4655	15.625	sediment trap	JGOFS website
473	BATS	-64	31	1999	300	4355	4655	17.5882	sediment trap	JGOFS website
473	BATS	-64	31	2000	300	4355	4655	15.795	sediment trap	JGOFS website
473	BATS	-64	31	2001	300	4355	4655	16.5109	sediment trap	JGOFS website
473	BATS	-64	31	2002	300	4355	4655	18.9764	sediment trap	JGOFS website
473	BATS	-64	31	2003	300	4355	4655	13.2908	sediment trap	JGOFS website
473	BATS	-64	31	2004	300	4355	4655	14.7275	sediment trap	JGOFS website
473	BATS	-64	31	2005	300	4355	4655	11.025	sediment trap	JGOFS website
473	BATS	-64	31	2006	300	4355	4655	15.2409	sediment trap	JGOFS website
473	BATS	-64	31	2007	300	4355	4655	10.565	sediment trap	JGOFS website
473	BATS	-64	31	2008	300	4355	4655	8.9645	sediment trap	JGOFS website
473	BATS	-64	31	2009	300	4355	4655	14.2182	sediment trap	JGOFS website
473	BATS	-64	31	2010	300	4355	4655	9.667	sediment trap	JGOFS website
473	BATS	-64	31	2011	300	4355	4655	23.0318	sediment trap	JGOFS website
473	BATS	-64	31	2012	300	4355	4655	9.5218	sediment trap	JGOFS website
473	BATS	-64	31	2013	300	4355	4655	12.895	sediment trap	JGOFS website
473	BATS	-64	31	2014	300	4355	4655	12.35	sediment trap	JGOFS website
473	BATS	-64	31	2015	300	4355	4655	22.2344	sediment trap	JGOFS website
473	BATS	-64	31	2016	300	4355	4655	12.25	sediment trap	JGOFS website
474	40N	165	40	1997	953	4547	5500	2.25	sediment trap	Honda et al. (2002)
474	40N	165	40	1998	953	4547	5500	4.5069	sediment trap	Honda et al. (2002)
474	40N	165	40	1999	953	4547	5500	5.6208	sediment trap	Honda et al. (2002)
474	40N	165	40	2000	953	4547	5500	0.38	sediment trap	Honda et al. (2002)
474	40N	165	40	1997	2986	2514	5500	1.19	sediment trap	Honda et al. (2002)
474	40N	165	40	1998	2986	2514	5500	3.8555	sediment trap	Honda et al. (2002)
474	40N	165	40	1999	2986	2514	5500	4.1792	sediment trap	Honda et al. (2002)
474	40N	165	40	2000	2986	2514	5500	1.325	sediment trap	Honda et al. (2002)
474	40N	165	40	1997	5016	484	5500	0.965	sediment trap	Honda et al. (2002)
474	40N	165	40	1998	5016	484	5500	3.1317	sediment trap	Honda et al. (2002)
474	40N	165	40	1999	5016	484	5500	3.7891	sediment trap	Honda et al. (2002)
474	40N	165	40	2000	5016	484	5500	1.5	sediment trap	Honda et al. (2002)
475	50N	165	50	1997	1227	4273	5500	1.585	sediment trap	Honda et al. (2002)
475	50N	165	50	1998	1227	4273	5500	6.8817	sediment trap	Honda et al. (2002)
475	50N	165	50	1999	1227	4273	5500	2.7645	sediment trap	Honda et al. (2002)
475	50N	165	50	1997	3260	2240	5500	2.18	sediment trap	Honda et al. (2002)
475	50N	165	50	1998	3260	2240	5500	3.3463	sediment trap	Honda et al. (2002)
475	50N	165	50	1999	3260	2240	5500	2.9322	sediment trap	Honda et al. (2002)
475	50N	165	50	2000	3260	2240	5500	3.21	sediment trap	Honda et al. (2002)
475	50N	165	50	1997	5090	410	5500	1.56	sediment trap	Honda et al. (2002)
475	50N	165	50	1998	5090	410	5500	2.53	sediment trap	Honda et al. (2002)
476	AM2	61.52	-52	1994	1300	3300	4600	5.4	sediment trap	Thunell (1998, Thunell (1998)
476	AM2	61.52	-52	1995	1300	3300	4600	0.355	sediment trap	Thunell (1998, Thunell (1998)
476	AM2	61.52	-52	1994	4000	600	4600	2.07	sediment trap	Thunell (1998, Thunell (1998)
476	AM2	61.52	-52	1995	4000	600	4600	1.37	sediment trap	Thunell (1998, Thunell (1998)
477	AM3	71	-63	1994	1300	2720	4020	0.7225	sediment trap	Thunell (1998, Thunell (1998)
477	AM3	71	-63	1995	1300	2720	4020	0.5	sediment trap	Thunell (1998, Thunell (1998)
477	AM3	71	-63	1994	3500	520	4020	0.4295	sediment trap	Thunell (1998, Thunell (1998)
477	AM3	71	-63	1995	3500	520	4020	0.7233	sediment trap	Thunell (1998, Thunell (1998)
478	B	179	58	1991	3137	646	3783	4.2878	sediment trap	JGOFS website
478	B	179	58	1992	3137	646	3783	3.6325	sediment trap	JGOFS website
479	ECC	138.83	5.01	1988	1130	3000	4130	1.68	sediment trap	Kempe and Knaack (1996)
479	ECC	138.83	5.01	1989	1130	3000	4130	1.7964	sediment trap	Kempe and Knaack (1996)
479	ECC	138.83	5.01	1988	3130	1000	4130	0.165	sediment trap	Kempe and Knaack (1996)
479	ECC	138.83	5.01	1989	3130	1000	4130	0.7645	sediment trap	Kempe and Knaack (1996)
480	EJS	132.4	39.67	1994	2800	300	3100	12.5133	sediment trap	JGOFS website
480	EJS	132.4	39.67	1995	2800	300	3100	3.535	sediment trap	JGOFS website
481	GB	-111.66	27.8833	1990	500	200	700	22.1538	sediment trap	Thunell (1998)
481	GB	-111.66	27.8833	1991	500	200	700	14.4783	sediment trap	Thunell (1998)
481	GB	-111.66	27.8833	1992	500	200	700	23.2727	sediment trap	Thunell (1998)
481	GB	-111.66	27.8833	1993	500	200	700	12.7222	sediment trap	Thunell (1998)
481	GB	-111.66	27.8833	1994	500	200	700	21.4167	sediment trap	Thunell (1998)
481	GB	-111.66	27.8833	1995	500	200	700	23.7037	sediment trap	Thunell (1998)
481	GB	-111.66	27.8833	1996	500	200	700	19.3462	sediment trap	Thunell (1998)
482	HOTs	-158	22	1988	150	3535	3685	27	sediment trap	JGOFS website
482	HOTs	-158	22	1989	150	3535	3685	37.59	sediment trap	JGOFS website
482	HOTs	-158	22	1990	150	3535	3685	34.8111	sediment trap	JGOFS website
482	HOTs	-158	22	1991	70	3615	3685	26.28	sediment trap	JGOFS website
482	HOTs	-158	22	1992	150	3535	3685	26.0375	sediment trap	JGOFS website
482	HOTs	-158	22	1993	150	3535	3685	24.1923	sediment trap	JGOFS website
482	HOTs	-158	22	1994	150	3535	3685	23.1481	sediment trap	JGOFS website
482	HOTs	-158	22	1995	150	3535	3685	18.6063	sediment trap	JGOFS website
482	HOTs	-158	22	1996	150	3535	3685	24.8417	sediment trap	JGOFS website
482	HOTs	-158	22	1997	150	3535	3685	31.0143	sediment trap	JGOFS website
482	HOTs	-158	22	1998	150	3535	3685	30	sediment trap	JGOFS website
482	HOTs	-158	22	1999	150	3535	3685	31.02	sediment trap	JGOFS website
482	HOTs	-158	22	2000	150	3535	3685	27.6818	sediment trap	JGOFS website
482	HOTs	-158	22	2001	150	3535	3685	29.19	sediment trap	JGOFS website
482	HOTs	-158	22	2002	150	3535	3685	31.8889	sediment trap	JGOFS website
482	HOTs	-158	22	2003	150	3535	3685	34.4222	sediment trap	JGOFS website
482	HOTs	-158	22	2004	150	3535	3685	26.8818	sediment trap	JGOFS website
482	HOTs	-158	22	2005	150	3535	3685	28.77	sediment trap	JGOFS website
482	HOTs	-158	22	2006	150	3535	3685	27.2636	sediment trap	JGOFS website
482	HOTs	-158	22	2007	150	3535	3685	31.5375	sediment trap	JGOFS website
482	HOTs	-158	22	2008	150	3535	3685	26.0429	sediment trap	JGOFS website
482	HOTs	-158	22	2009	150	3535	3685	25.2	sediment trap	JGOFS website
482	HOTs	-158	22	2010	150	3535	3685	27.1286	sediment trap	JGOFS website
482	HOTs	-158	22	2011	150	3535	3685	25.0857	sediment trap	JGOFS website
482	HOTs	-158	22	2012	150	3535	3685	27.84	sediment trap	JGOFS website
482	HOTs	-158	22	2013	150	3535	3685	20.04	sediment trap	JGOFS website
482	HOTs	-158	22	2014	150	3535	3685	23.87	sediment trap	JGOFS website
482	HOTs	-158	22	2015	150	3535	3685	34.6625	sediment trap	JGOFS website
482	HOTs	-158	22	2016	150	3535	3685	30.7833	sediment trap	JGOFS website
482	HOTs	-158	22	2017	150	3535	3685	25.5	sediment trap	JGOFS website
482	HOTs	-158	22	2018	150	3535	3685	25.68	sediment trap	JGOFS website
482	HOTs	-158	22	2019	150	3535	3685	28.4375	sediment trap	JGOFS website
482	HOTs	-158	22	1988	300	3385	3685	17	sediment trap	JGOFS website
482	HOTs	-158	22	1989	300	3385	3685	18.2471	sediment trap	JGOFS website
482	HOTs	-158	22	1990	300	3385	3685	15.0111	sediment trap	JGOFS website
482	HOTs	-158	22	1991	300	3385	3685	12.272	sediment trap	JGOFS website
482	HOTs	-158	22	1992	300	3385	3685	10.5278	sediment trap	JGOFS website
482	HOTs	-158	22	1993	300	3385	3685	11.3667	sediment trap	JGOFS website
482	HOTs	-158	22	1994	300	3385	3685	11.4971	sediment trap	JGOFS website
482	HOTs	-158	22	1995	300	3385	3685	9.4	sediment trap	JGOFS website
483	JAST03	127.35	25.05	1994	3157	614	3771	2.298	sediment trap	JGOFS website
483	JAST03	127.35	25.05	1995	3157	614	3771	2.9815	sediment trap	JGOFS website
484	KNOT	155	44	1997	924	4576	5500	3.67	sediment trap	Honda et al. (2002)
484	KNOT	155	44	1998	924	4576	5500	6.8629	sediment trap	Honda et al. (2002)
484	KNOT	155	44	1999	924	4576	5500	11.7064	sediment trap	Honda et al. (2002)
484	KNOT	155	44	2000	924	4576	5500	8.3843	sediment trap	Honda et al. (2002)
484	KNOT	155	44	1997	2957	2543	5500	5.27	sediment trap	Honda et al. (2002)
484	KNOT	155	44	1998	2957	2543	5500	6.2023	sediment trap	Honda et al. (2002)
484	KNOT	155	44	1999	2957	2543	5500	5.9861	sediment trap	Honda et al. (2002)
484	KNOT	155	44	2000	2957	2543	5500	5.4957	sediment trap	Honda et al. (2002)
484	KNOT	155	44	1997	4989	511	5500	4.28	sediment trap	Honda et al. (2002)
484	KNOT	155	44	1998	4989	511	5500	4.3909	sediment trap	Honda et al. (2002)
484	KNOT	155	44	1999	4989	511	5500	3.9955	sediment trap	Honda et al. (2002)
484	KNOT	155	44	2000	4989	511	5500	2.0767	sediment trap	Honda et al. (2002)
485	M1	57.85	17.69	1994	808	639	1447	11.39	sediment trap	Honjo et al. (1999)
485	M1	57.85	17.69	1995	808	639	1447	14.754	sediment trap	Honjo et al. (1999)
486	M2	58.8	17.4	1994	828	2814	3642	19.0655	sediment trap	Honjo et al. (1999)
486	M2	58.8	17.4	1995	828	2814	3642	17.2155	sediment trap	Honjo et al. (1999)
486	M2	58.8	17.4	1994	1974	1668	3642	13.4514	sediment trap	Honjo et al. (1999)
486	M2	58.8	17.4	1995	1974	1668	3642	19.1174	sediment trap	Honjo et al. (1999)
486	M2	58.8	17.4	1994	3141	501	3642	9.5986	sediment trap	Honjo et al. (1999)
486	M2	58.8	17.4	1995	3141	501	3642	10.8861	sediment trap	Honjo et al. (1999)
487	M3	59.59	17.21	1994	764	2701	3465	18.7364	sediment trap	Honjo et al. (1999)
487	M3	59.59	17.21	1995	764	2701	3465	9.985	sediment trap	Honjo et al. (1999)
487	M3	59.59	17.21	1994	1857	1608	3465	12.59	sediment trap	Honjo et al. (1999)
487	M3	59.59	17.21	1995	1857	1608	3465	12.8664	sediment trap	Honjo et al. (1999)
487	M3	59.59	17.21	1994	2871	594	3465	13.85	sediment trap	Honjo et al. (1999)
487	M3	59.59	17.21	1995	2871	594	3465	9.5793	sediment trap	Honjo et al. (1999)
488	M3	59.59	17.22	1995	792	2685	3477	20.2165	sediment trap	Honjo et al. (1999)
488	M3	59.59	17.22	1995	1882	1595	3477	21.37	sediment trap	Honjo et al. (1999)
488	M3	59.59	17.22	1995	2991	486	3477	15.6256	sediment trap	Honjo et al. (1999)
489	M4	61.5	15.33	1994	821	3153	3974	11.9357	sediment trap	Honjo et al. (1999)
489	M4	61.5	15.33	1995	821	3153	3974	9.0036	sediment trap	Honjo et al. (1999)
489	M4	61.5	15.33	1994	2229	1745	3974	9.2329	sediment trap	Honjo et al. (1999)
489	M4	61.5	15.33	1995	2229	1745	3974	10.1893	sediment trap	Honjo et al. (1999)
489	M4	61.5	15.33	1994	3478	496	3974	7.5686	sediment trap	Honjo et al. (1999)
489	M4	61.5	15.33	1995	3478	496	3974	9.245	sediment trap	Honjo et al. (1999)
490	M4	61.5	15.98	1995	807	3176	3983	19.5711	sediment trap	Honjo et al. (1999)
490	M4	61.5	15.98	1995	2215	1768	3983	13.4655	sediment trap	Honjo et al. (1999)
490	M4	61.5	15.98	1995	3489	494	3983	10.0524	sediment trap	Honjo et al. (1999)
491	M5	65	10	1994	800	3611	4411	7.915	sediment trap	Honjo et al. (1999)
491	M5	65	10	1995	800	3611	4411	5.1857	sediment trap	Honjo et al. (1999)
491	M5	65	10	1994	2363	2048	4411	4.08	sediment trap	Honjo et al. (1999)
491	M5	65	10	1995	2363	2048	4411	3.8568	sediment trap	Honjo et al. (1999)
491	M5	65	10	1994	3915	496	4411	3.63	sediment trap	Honjo et al. (1999)
491	M5	65	10	1995	3915	496	4411	3.3742	sediment trap	Honjo et al. (1999)
492	NCB	-132	78	1996	200	3209	3409	0.1877	sediment trap	JGOFS website
492	NCB	-132	78	1997	200	3209	3409	0.3967	sediment trap	JGOFS website
493	Okhotsk	149	53	1990	258	912	1170	9.1528	sediment trap	JGOFS website
493	Okhotsk	149	53	1991	258	912	1170	13.275	sediment trap	JGOFS website
493	Okhotsk	149	53	1990	1061	109	1170	5.9082	sediment trap	JGOFS website
493	Okhotsk	149	53	1991	1061	109	1170	3.3889	sediment trap	JGOFS website
494	PS	-102.65	79.39	1989	100	405	505	0.4	sediment trap	Hargrave et al. (1994)
494	PS	-102.65	79.39	1990	100	405	505	0.5488	sediment trap	Hargrave et al. (1994)
495	PZ	72.9758	-62.4771	1998	1400	2600	4000	14.39	sediment trap	Pilskaln et al. (2004)
496	SHEBA	-150	77.5	1997	120	3605	3725	0.335	sediment trap	JGOFS website
496	SHEBA	-150	77.5	1998	120	3605	3725	2.21	sediment trap	JGOFS website
497	site1	135.017	2.9833	1991	1592	2822	4414	9.8414	sediment trap	Kawahata et al. (1998)
497	site1	135.017	2.9833	1992	1592	2822	4414	9.6925	sediment trap	Kawahata et al. (1998)
497	site1	135.017	2.9833	1991	3902	512	4414	8.0921	sediment trap	Kawahata et al. (1998)
497	site1	135.017	2.9833	1992	3902	512	4414	9.605	sediment trap	Kawahata et al. (1998)
498	site5	175	34.42	1993	1342	2023	3365	3.0575	sediment trap	Kawahata et al. (1998)
498	site5	175	34.42	1994	1342	2023	3365	3.77	sediment trap	Kawahata et al. (1998)
498	site5	175	34.42	1993	2848	517	3365	3.6988	sediment trap	Kawahata et al. (1998)
498	site5	175	34.42	1994	2848	517	3365	5.412	sediment trap	Kawahata et al. (1998)
499	site6	175	30	1993	3873	1517	5390	1.285	sediment trap	Kawahata et al. (1998)
499	site6	175	30	1994	3873	1517	5390	4.7333	sediment trap	Kawahata et al. (1998)
500	site7	174.933	37.4	1993	1428	3677	5105	7.1586	sediment trap	Kawahata et al. (1998)
500	site7	174.933	37.4	1994	1428	3677	5105	4.98	sediment trap	Kawahata et al. (1998)
500	site7	174.933	37.4	1993	4588	517	5105	3.0829	sediment trap	Kawahata et al. (1998)
500	site7	174.933	37.4	1994	1428	3677	5105	4.98	sediment trap	Kawahata et al. (1998)
500	site7	174.933	37.4	1993	4588	517	5105	3.0829	sediment trap	Kawahata et al. (1998)
500	site7	174.933	37.4	1994	4588	517	5105	3.0729	sediment trap	Kawahata et al. (1998)
501	MS-1	-174.73	-53.03	1996	986	4455	5441	0.155	sediment trap	Honjo et al. (2000)
501	MS-1	-174.73	-53.03	1997	986	4455	5441	1.1606	sediment trap	Honjo et al. (2000)
501	MS-1	-174.73	-53.03	1996	1981	3460	5441	16.84	sediment trap	Honjo et al. (2000)
501	MS-1	-174.73	-53.03	1997	1981	3460	5441	31.96	sediment trap	Honjo et al. (2000)
502	MS-2	-170.17	-56.9	1996	982	3942	4924	14.8	sediment trap	Honjo et al. (2000)
502	MS-2	-170.17	-56.9	1997	982	3942	4924	5.66	sediment trap	Honjo et al. (2000)
502	MS-2	-170.17	-56.9	1998	982	3942	4924	14.88	sediment trap	Honjo et al. (2000)
502	MS-2	-170.17	-56.9	1996	4224	700	4924	3.81	sediment trap	Honjo et al. (2000)
502	MS-2	-170.17	-56.9	1997	4224	700	4924	2.1817	sediment trap	Honjo et al. (2000)
502	MS-2	-170.17	-56.9	1998	4224	700	4924	0.26	sediment trap	Honjo et al. (2000)
503	MS-3	-170.06	-60.28	1996	1003	2955	3958	11.615	sediment trap	Honjo et al. (2000)
503	MS-3	-170.06	-60.28	1997	1003	2955	3958	6.2513	sediment trap	Honjo et al. (2000)
504	MS-5	-168.67	-66.16	1996	1033	1983	3016	0.4114	sediment trap	Honjo et al. (2000)
504	MS-5	-168.67	-66.16	1997	1033	1983	3016	4.2222	sediment trap	Honjo et al. (2000)
504	MS-5	-168.67	-66.16	1996	2311	705	3016	0.155	sediment trap	Honjo et al. (2000)
504	MS-5	-168.67	-66.16	1997	2311	705	3016	3.8333	sediment trap	Honjo et al. (2000)
505	MS-6	176.89	-73.54	1996	200	366	566	3.47	sediment trap	Honjo et al. (2000)
505	MS-6	176.89	-73.54	1997	200	366	566	4.32	sediment trap	Honjo et al. (2000)
505	MS-6	176.89	-73.54	1996	460	106	566	2.62	sediment trap	Honjo et al. (2000)
505	MS-6	176.89	-73.54	1997	460	106	566	8.91	sediment trap	Honjo et al. (2000)
506	EBC2-1	-13.1557	28.7082	1997	700	296	996	5.8765	sediment trap	Lyle et al. (1992, Žarić et al. (2005)
507	MW	-127.58	42.19	1987	1000	1830	2830	3.91	sediment trap	Lyle et al. (1992, Žarić et al. (2005)
507	MW	-127.58	42.19	1988	1000	1830	2830	8.2	sediment trap	Lyle et al. (1992, Žarić et al. (2005)
508	NS	-125.77	42.09	1987	1000	1829	2829	13.0967	sediment trap	Lyle et al. (1992, Žarić et al. (2005)
508	NS	-125.77	42.09	1988	1000	1829	2829	13.3933	sediment trap	Lyle et al. (1992, Žarić et al. (2005)
509	G	-132	41.55	1987	1000	2663	3663	0.89	sediment trap	Lyle et al. (1992, Žarić et al. (2005)
509	G	-132	41.55	1988	1000	2663	3663	5.07	sediment trap	Lyle et al. (1992, Žarić et al. (2005)
510	K2	160	47	2006	4810	388	5198	2.6898	sediment trap	Dobashi et al. (2021)
510	K2	160	47	2007	4810	388	5198	1.7782	sediment trap	Dobashi et al. (2021)
510	K2	160	47	2008	4810	388	5198	4.3515	sediment trap	Dobashi et al. (2021)
510	K2	160	47	2010	4810	388	5198	5.2092	sediment trap	Dobashi et al. (2021)
510	K2	160	47	2011	4810	388	5198	6.8061	sediment trap	Dobashi et al. (2021)
510	K2	160	47	2012	4810	388	5198	4.6215	sediment trap	Dobashi et al. (2021)
510	K2	160	47	2013	4810	388	5198	3.9948	sediment trap	Dobashi et al. (2021)
510	K2	160	47	2014	4810	388	5198	4.1291	sediment trap	Dobashi et al. (2021)
510	K2	160	47	2015	4810	388	5198	1.4252	sediment trap	Dobashi et al. (2021)
510	K2	160	47	2016	4810	388	5198	3.7847	sediment trap	Dobashi et al. (2021)
510	K2	160	47	2017	4810	388	5198	4.6	sediment trap	Dobashi et al. (2021)
511	JA06-M01	158.25	19.85	2016	1000	4220	5220	1.1265	sediment trap	Yamaoka et al. (2020)
511	JA06-M01	158.25	19.85	2017	1000	4220	5220	0.6047	sediment trap	Yamaoka et al. (2020)
511	JA06-M01	158.25	19.85	2016	4720	500	5220	0.5495	sediment trap	Yamaoka et al. (2020)
511	JA06-M01	158.25	19.85	2017	4720	500	5220	0.4792	sediment trap	Yamaoka et al. (2020)
512	JA06-M02	157.88	19.58	2016	900	370	1270	0.2977	sediment trap	Yamaoka et al. (2020)
512	JA06-M02	157.88	19.58	2017	900	370	1270	0.2337	sediment trap	Yamaoka et al. (2020)
513	KOMO	-131.333	10.5	2011	4500	505	5005	2.35	sediment trap	Kim et al. (2021)
513	KOMO	-131.333	10.5	2012	4500	505	5005	4.5719	sediment trap	Kim et al. (2021)
514	OSP	-145	50	2018	95	4145	4240	29.5333	sediment trap	Estapa et al. (2021)
514	OSP	-145	50	2018	203	4037	4240	23.8971	sediment trap	Estapa et al. (2021)
515	CB1	-19.742	20.75	1988	2195	1451	3646	7.6727	sediment trap	Wefer and Fischer (1993)
515	CB1	-19.742	20.75	1989	2195	1451	3646	6.35	sediment trap	Wefer and Fischer (1993)
516	GB	-177	45	1991-1992	5600	800	6400	1.37	sediment trap	Wong et al. (1994)
517	GD	165	51.5	1991-1992	4500	460	4960	4.38	sediment trap	Wong et al. (1994)
518	JDF	-128.1	48	1984-1985	2200	413	2613	2.99	sediment trap	Pena et al. (1999)
519	MFZ	-127.7	39.5	1983	4230	15	4245	3.48	sediment trap	Fischer et al. (1983)
520	NP-B	162.1	46.8	1985-1986	700	4970	5670	33.7	sediment trap	Fischer et al. (1983)
520	NP-B	162.1	46.8	1985-1986	5200	470	5670	5.1	sediment trap	Fischer et al. (1983)
521	S	-140.1	11	1982-1984	4620	323	4943	0.9309	sediment trap	Dymond and Collier (1988)
522	JM3_DRIFT1	17.05	70.4	1994	20	927	947	214.531	sediment trap	https://doi.org/10.1594/PANGAEA.218089
523	JM5_DRIFT1	17.17	70.42	1994	20	389	409	208.448	sediment trap	https://doi.org/10.1594/PANGAEA.218091
524	JM9_DRIFT1	16.66	69.742	1995	20	407	427	154.942	sediment trap	https://doi.org/10.1594/PANGAEA.218094
525	Med	7.6666	43.3333	2003	117	2183	2300	11.3636	sediment trap	https://doi.org/10.1594/PANGAEA.806963
525	Med	7.6666	43.3333	2003	238	2062	2300	23.2227	sediment trap	https://doi.org/10.1594/PANGAEA.806963
525	Med	7.6666	43.3333	2005	313	1987	2300	13.3	sediment trap	https://doi.org/10.1594/PANGAEA.806963
525	Med	7.6666	43.3333	2003	1918	382	2300	5.5917	sediment trap	https://doi.org/10.1594/PANGAEA.806963
526	NB6	0.463	69.687	1991	500	2757	3257	5.8856	sediment trap	https://doi.org/10.1594/PANGAEA.60035
526	NB6	0.463	69.687	1992	500	2757	3257	2.5622	sediment trap	https://doi.org/10.1594/PANGAEA.60035
526	NB6	0.463	69.687	1991	3000	257	3257	10.09	sediment trap	https://doi.org/10.1594/PANGAEA.60035
526	NB6	0.463	69.687	1992	3000	257	3257	5.8867	sediment trap	https://doi.org/10.1594/PANGAEA.60035
527	NU2	13.117	-29.2	1992	2516	531	3047	4.4421	sediment trap	https://doi.org/10.1594/PANGAEA.115858
527	NU2	13.117	-29.2	1993	2516	531	3047	0.8	sediment trap	https://doi.org/10.1594/PANGAEA.115858
528	NW	-68.366	39.466	2004	968	2001	2969	16.325	sediment trap	https://doi.org/10.1594/PANGAEA.793329
528	NW	-68.366	39.466	2005	968	2001	2969	17.3667	sediment trap	https://doi.org/10.1594/PANGAEA.793329
528	NW	-68.366	39.466	2004	1976	993	2969	7.8818	sediment trap	https://doi.org/10.1594/PANGAEA.793329
528	NW	-68.366	39.466	2005	1976	993	2969	11.95	sediment trap	https://doi.org/10.1594/PANGAEA.793329
528	NW	-68.366	39.466	2004	2938	31	2969	8.3769	sediment trap	https://doi.org/10.1594/PANGAEA.793329
528	NW	-68.366	39.466	2005	2938	31	2969	12.5625	sediment trap	https://doi.org/10.1594/PANGAEA.793329
529	OG4	-7.712	72.383	1990	500	2097	2597	3.5508	sediment trap	https://doi.org/10.1594/PANGAEA.60034
529	OG4	-7.712	72.383	1991	500	2097	2597	3.0813	sediment trap	https://doi.org/10.1594/PANGAEA.60034
529	OG4	-7.712	72.383	1994	500	2097	2597	3.8071	sediment trap	https://doi.org/10.1594/PANGAEA.60034
529	OG4	-7.712	72.383	1995	500	2097	2597	3.0821	sediment trap	https://doi.org/10.1594/PANGAEA.60034
529	OG4	-7.712	72.383	1990	2310	287	2597	2.04	sediment trap	https://doi.org/10.1594/PANGAEA.60034
529	OG4	-7.712	72.383	1991	2310	287	2597	0.6909	sediment trap	https://doi.org/10.1594/PANGAEA.60034
529	OG4	-7.712	72.383	1994	2310	287	2597	2.04	sediment trap	https://doi.org/10.1594/PANGAEA.60034
529	OG4	-7.712	72.383	1995	2310	287	2597	0.6918	sediment trap	https://doi.org/10.1594/PANGAEA.60034
530	OG5	-7.712	72.382	1995	500	2097	2597	5.5669	sediment trap	https://doi.org/10.1594/PANGAEA.72222
530	OG5	-7.712	72.382	1996	500	2097	2597	1.8668	sediment trap	https://doi.org/10.1594/PANGAEA.72222
530	OG5	-7.712	72.382	1995	2200	397	2597	2.4263	sediment trap	https://doi.org/10.1594/PANGAEA.72222
530	OG5	-7.712	72.382	1996	2200	397	2597	2.4742	sediment trap	https://doi.org/10.1594/PANGAEA.72222
531	PAP-XV	-16.352	49	1995	1000	3567	4567	0.965	sediment trap	https://doi.org/10.1594/PANGAEA.108315
531	PAP-XV	-16.352	49	1996	1000	3849	4849	1.068	sediment trap	https://doi.org/10.1594/PANGAEA.108315
531	PAP-XV	-16.352	49	1995	3000	1849	4849	1.522	sediment trap	https://doi.org/10.1594/PANGAEA.108315
531	PAP-XV	-16.352	49	1996	3000	1849	4849	1.3713	sediment trap	https://doi.org/10.1594/PANGAEA.108315
531	PAP-XV	-16.352	49	1995	4700	149	4849	1.958	sediment trap	https://doi.org/10.1594/PANGAEA.108315
531	PAP-XV	-16.352	49	1996	4700	149	4849	1.6475	sediment trap	https://doi.org/10.1594/PANGAEA.108315
532	PAP-XVIII	-16.299	49.075	1996	1000	3849	4849	3.294	sediment trap	https://doi.org/10.1594/PANGAEA.108316
532	PAP-XVIII	-16.299	49.075	1997	1000	3725	4725	0.77	sediment trap	https://doi.org/10.1594/PANGAEA.108316
532	PAP-XVIII	-16.299	49.075	1996	3000	1725	4725	3.4417	sediment trap	https://doi.org/10.1594/PANGAEA.108316
532	PAP-XVIII	-16.299	49.075	1997	3000	1725	4725	1.0933	sediment trap	https://doi.org/10.1594/PANGAEA.108316
533	PAP-XXVI	-16.437	48.992	1999	3000	1725	4725	6.0172	sediment trap	https://doi.org/10.1594/PANGAEA.794531
533	PAP-XXVI	-16.437	48.992	2000	3000	1860	4860	2.6889	sediment trap	https://doi.org/10.1594/PANGAEA.794531
533	PAP-XXVII	-16.437	48.992	2001	3000	1845	4845	7.62	sediment trap	https://doi.org/10.1594/PANGAEA.794532
533	PAP-XXVIII	-16.437	48.992	2002	3000	1845	4845	1.2833	sediment trap	https://doi.org/10.1594/PANGAEA.794533
533	PAP-XXVIII	-16.437	48.992	2003	3000	1845	4845	4.2381	sediment trap	https://doi.org/10.1594/PANGAEA.794533
533	PAP-XXXI	-16.437	48.992	2004	3000	1845	4845	4.7316	sediment trap	https://doi.org/10.1594/PANGAEA.794534
533	PAP-XXXIV	-16.437	48.992	2005	3000	1845	4845	0.6	sediment trap	https://doi.org/10.1594/PANGAEA.794534
534	PL943	69.973	79.39	1984	55	464	519	4.65	sediment trap	https://doi.org/10.1594/PANGAEA.56212
534	PL943	69.973	79.39	1984	205	314	519	2.21	sediment trap	https://doi.org/10.1594/PANGAEA.56212
535	PS2756-1	138.92	81.072	1995	150	1561	1711	1.3614	sediment trap	https://doi.org/10.1594/PANGAEA.586835
535	PS2756-1	138.92	81.072	1996	150	1561	1711	4.6077	sediment trap	https://doi.org/10.1594/PANGAEA.586835
535	PS2756-1	138.92	81.072	1995	1550	161	1711	3.38	sediment trap	https://doi.org/10.1594/PANGAEA.586835
535	PS2756-1	138.92	81.072	1996	1550	161	1711	1.9938	sediment trap	https://doi.org/10.1594/PANGAEA.586835
536	WA1	-25.567	-4	1992	652	4878	5530	8.835	sediment trap	https://doi.org/10.1594/PANGAEA.264698
536	WA1	-25.567	-4	1993	652	4878	5530	6.179	sediment trap	https://doi.org/10.1594/PANGAEA.264698
536	WA1	-25.567	-4	1992	1232	4298	5530	6.159	sediment trap	https://doi.org/10.1594/PANGAEA.264698
536	WA1	-25.567	-4	1993	1232	4298	5530	5.699	sediment trap	https://doi.org/10.1594/PANGAEA.264698
536	WA1	-25.567	-4	1992	4991	539	5530	3.453	sediment trap	https://doi.org/10.1594/PANGAEA.264698
536	WA1	-25.567	-4	1993	4991	539	5530	3.02	sediment trap	https://doi.org/10.1594/PANGAEA.264698
537	WA2	-28.042	-7.522	1992	591	4979	5570	5.247	sediment trap	https://doi.org/10.1594/PANGAEA.264532
537	WA2	-28.042	-7.522	1993	591	4979	5570	3.556	sediment trap	https://doi.org/10.1594/PANGAEA.264532
538	WA3	-28.033	-7.517	1993	5031	546	5577	1.0167	sediment trap	https://doi.org/10.1594/PANGAEA.264700
538	WA3	-28.033	-7.517	1994	5031	546	5577	1.0843	sediment trap	https://doi.org/10.1594/PANGAEA.264700
539	WAB1	-28.52	-11.55	1997	727	4776	5503	1.2786	sediment trap	https://doi.org/10.1594/PANGAEA.264536
539	WAB1	-28.52	-11.55	1998	727	4776	5503	1.15	sediment trap	https://doi.org/10.1594/PANGAEA.264536
539	WAB1	-28.52	-11.55	1994	5031	472	5503	0.54	sediment trap	https://doi.org/10.1594/PANGAEA.264536
539	WAB1	-28.52	-11.55	1997	4515	988	5503	0.5429	sediment trap	https://doi.org/10.1594/PANGAEA.264536
539	WAB1	-28.52	-11.55	1998	4515	988	5503	0.6333	sediment trap	https://doi.org/10.1594/PANGAEA.264536
540	WAB2	-28.53	-11.58	1998	710	4783	5493	2.2	sediment trap	https://doi.org/10.1594/PANGAEA.264536
540	WAB2	-28.53	-11.58	1999	710	4783	5493	1.35	sediment trap	https://doi.org/10.1594/PANGAEA.264536
541	WR1	9.167	-20.07	1988	1640	577	2217	21.7	sediment trap	https://doi.org/10.1594/PANGAEA.357381
542	WR2	9.15	-20.05	1989	599	1597	2196	15.2938	sediment trap	https://doi.org/10.1594/PANGAEA.357382
542	WR2	9.15	-20.05	1990	599	1597	2196	5.8417	sediment trap	https://doi.org/10.1594/PANGAEA.357382
542	WR2	9.15	-20.05	1989	1648	548	2196	16.9275	sediment trap	https://doi.org/10.1594/PANGAEA.357382
543	WR3	9.162	-20.04	1990	1648	560	2208	9.8431	sediment trap	https://doi.org/10.1594/PANGAEA.357383
543	WR3	9.162	-20.04	1991	1648	560	2208	0.8333	sediment trap	https://doi.org/10.1594/PANGAEA.357383
544	WS1	-34.767	-62.45	1985	863	3017	3880	0.1438	sediment trap	https://doi.org/10.1594/PANGAEA.264546
544	WS1	-34.767	-62.45	1986	863	3017	3880	0.0275	sediment trap	https://doi.org/10.1594/PANGAEA.264546
545	WS2	-2.5	-62.917	1987	4456	544	5000	0.6031	sediment trap	https://doi.org/10.1594/PANGAEA.264547
546	WS3	-2.563	-64.902	1988	360	4693	5053	9.2067	sediment trap	https://doi.org/10.1594/PANGAEA.89396
546	WS3	-2.563	-64.902	1989	360	4693	5053	2.23	sediment trap	https://doi.org/10.1594/PANGAEA.89396
547	WS4	-2.596	-64.929	1989	352	4692	5044	4.515	sediment trap	https://doi.org/10.1594/PANGAEA.89397
234Th method
1	-	-41.25	59.54	2010	150	-	-	144.67	234Th method	Le Moigne et al. (2012)
2	-	-35.07	58.13	2010	150	-	-	135.8	234Th method	Le Moigne et al. (2012)
3	-	-35.05	63.49	2010	150	-	-	148.45	234Th method	Le Moigne et al. (2012)
4	-	-35	62.59	2010	150	-	-	113.01	234Th method	Le Moigne et al. (2012)
5	-	-34.59	59.59	2010	150	-	-	359.03	234Th method	Le Moigne et al. (2012)
6	-	-34.59	60	2010	150	-	-	260.78	234Th method	Le Moigne et al. (2012)
7	-	-34.59	63.49	2010	150	-	-	346.05	234Th method	Le Moigne et al. (2012)
8	-	-34.58	60.58	2010	150	-	-	354.4	234Th method	Le Moigne et al. (2012)
9	-	-34.57	60.01	2010	150	-	-	457.17	234Th method	Le Moigne et al. (2012)
10	-	-31.58	60	2010	150	-	-	109.45	234Th method	Le Moigne et al. (2012)
11	-	-29.49	62.59	2010	150	-	-	228.62	234Th method	Le Moigne et al. (2012)
12	-	-28.58	59.59	2010	150	-	-	206.98	234Th method	Le Moigne et al. (2012)
13	-	-26.07	59.56	2010	150	-	-	166.39	234Th method	Le Moigne et al. (2012)
14	-	-24.2	62.02	2010	150	-	-	182.59	234Th method	Le Moigne et al. (2012)
15	-	-23.37	59.59	2010	150	-	-	161.18	234Th method	Le Moigne et al. (2012)
16	-	-21.45	60.5	2010	150	-	-	270.26	234Th method	Le Moigne et al. (2012)
17	-	-21.04	61.47	2010	150	-	-	129.75	234Th method	Le Moigne et al. (2012)
18	-	-20.57	61.19	2010	150	-	-	97.85	234Th method	Le Moigne et al. (2012)
19	-	-20.46	61.13	2010	150	-	-	103.81	234Th method	Le Moigne et al. (2012)
20	-	-19.59	61.59	2010	150	-	-	386.8	234Th method	Le Moigne et al. (2012)
21	-	0	-55.57	2008	100	-	-	51.6	234Th method	Planchon et al. (2013)
22	-	0	-51.87	2008	100	-	-	61.2	234Th method	Planchon et al. (2013)
23	-	0.04	-57.57	2008	100	-	-	39.6	234Th method	Planchon et al. (2013)
24	-	1.32	-50.38	2008	100	-	-	56.4	234Th method	Planchon et al. (2013)
25	-	2.83	-49.03	2008	100	-	-	42	234Th method	Planchon et al. (2013)
26	-	4.37	-45.55	2008	100	-	-	39.6	234Th method	Planchon et al. (2013)
27	-	5.87	-46.02	2008	100	-	-	31.2	234Th method	Planchon et al. (2013)
28	-	6.88	-44.9	2008	100	-	-	27.6	234Th method	Planchon et al. (2013)
29	-	8.56	-42.28	2008	100	-	-	20.4	234Th method	Planchon et al. (2013)
30	-	9.92	-41.18	2008	100	-	-	10.8	234Th method	Planchon et al. (2013)
31	-	13.1	-36.5	2008	100	-	-	21.6	234Th method	Planchon et al. (2013)
32	-	140.12	-46.43	2007	150	-	-	85.32	234Th method	Jacques et al. (2011)
33	-	140.2	-46.29	2007	150	-	-	70.2	234Th method	Jacques et al. (2011)
34	-	140.3	-46.27	2007	150	-	-	65.52	234Th method	Jacques et al. (2011)
35	-	140.39	-46.23	2007	150	-	-	126.24	234Th method	Jacques et al. (2011)
36	-	142.6	-49	2007	150	-	-	93.36	234Th method	Jacques et al. (2011)
37	-	143.01	-44.55	2007	150	-	-	94.68	234Th method	Jacques et al. (2011)
38	-	145.06	-54.27	2007	150	-	-	114	234Th method	Jacques et al. (2011)
39	-	145.87	-54	2007	150	-	-	59.76	234Th method	Jacques et al. (2011)
40	-	148.35	-50.56	2007	150	-	-	56.4	234Th method	Jacques et al. (2011)
41	-	149.26	-50	2007	150	-	-	60.72	234Th method	Jacques et al. (2011)
42	-	151.13	-48.02	2007	150	-	-	49.8	234Th method	Jacques et al. (2011)
43	-	152.28	-44.57	2007	150	-	-	44.04	234Th method	Jacques et al. (2011)
44	-	153.17	-45.27	2007	150	-	-	31.92	234Th method	Jacques et al. (2011)
45	-	153.36	-45.3	2007	150	-	-	41.64	234Th method	Jacques et al. (2011)
46	-	174.58	-43.58	2008	100	-	-	112.8	234Th method	Zhou et al. (2012)
47	-	174.58	-43.58	2008	100	-	-	144	234Th method	Zhou et al. (2012)
48	-	174.6	-42.88	2008	100	-	-	360	234Th method	Zhou et al. (2012)
49	-	174.6	-42.88	2008	100	-	-	168	234Th method	Zhou et al. (2012)
50	-	175.21	-43.18	2008	100	-	-	348	234Th method	Zhou et al. (2012)
51	-	175.21	-43.18	2008	100	-	-	204	234Th method	Zhou et al. (2012)
52	-	175.28	-44.38	2008	100	-	-	80.4	234Th method	Zhou et al. (2012)
53	-	175.33	-43.98	2008	100	-	-	132	234Th method	Zhou et al. (2012)
54	-	175.33	-43.98	2008	100	-	-	120	234Th method	Zhou et al. (2012)
55	-	175.33	-43.8	2008	100	-	-	67.2	234Th method	Zhou et al. (2012)
56	-	175.93	-42.83	2008	100	-	-	180	234Th method	Zhou et al. (2012)
57	-	176.05	-43.48	2008	100	-	-	93.6	234Th method	Zhou et al. (2012)
58	-	176.5	-43.65	2008	100	-	-	144	234Th method	Zhou et al. (2012)
59	-	177.5	-43.7	2008	100	-	-	192	234Th method	Zhou et al. (2012)
60	-	177.71	-44.1	2008	100	-	-	99.6	234Th method	Zhou et al. (2012)
61	-	178.2	-44.14	2008	100	-	-	204	234Th method	Zhou et al. (2012)
62	-	178.28	-42.83	2008	100	-	-	78	234Th method	Zhou et al. (2012)
63	-	178.36	-43.61	2008	100	-	-	84	234Th method	Zhou et al. (2012)
64	-	178.36	-43.61	2008	100	-	-	106.8	234Th method	Zhou et al. (2012)
65	-	178.36	-43.03	2008	100	-	-	100.8	234Th method	Zhou et al. (2012)
66	-	178.36	-42.75	2008	100	-	-	144	234Th method	Zhou et al. (2012)
67	-	178.46	-44.55	2008	100	-	-	72	234Th method	Zhou et al. (2012)
68	-	178.51	-43.7	2008	100	-	-	132	234Th method	Zhou et al. (2012)
69	-	178.58	-44.35	2008	100	-	-	192	234Th method	Zhou et al. (2012)
70	-	178.81	-42.81	2008	100	-	-	112.8	234Th method	Zhou et al. (2012)
71	-	64.9	10	1995	100	-	-	49.5	234Th method	Buesseler et al. (1998)
72	-	65	12.1	1995	100	-	-	60.9	234Th method	Buesseler et al. (1998)
73	-	65	14.4	1995	100	-	-	102	234Th method	Buesseler et al. (1998)
74	-	63.5	15.3	1995	100	-	-	76.8	234Th method	Buesseler et al. (1998)
75	-	62	16	1995	100	-	-	103.2	234Th method	Buesseler et al. (1998)
76	-	68.4	16.3	1995	100	-	-	56.1	234Th method	Buesseler et al. (1998)
77	-	61.5	16.4	1995	100	-	-	165	234Th method	Buesseler et al. (1998)
78	-	59.8	17.2	1995	100	-	-	118.2	234Th method	Buesseler et al. (1998)
79	-	67.9	17.3	1995	100	-	-	19.2	234Th method	Buesseler et al. (1998)
80	-	58.8	17.7	1995	100	-	-	159	234Th method	Buesseler et al. (1998)
81	-	58	18.1	1995	100	-	-	79.2	234Th method	Buesseler et al. (1998)
82	-	67.2	19.2	1995	100	-	-	34.8	234Th method	Buesseler et al. (1998)
83	-	65.9	19.9	1995	100	-	-	65.4	234Th method	Buesseler et al. (1998)
84	-	63.5	21.2	1995	100	-	-	80.1	234Th method	Buesseler et al. (1998)
85	-	61.2	22.5	1995	100	-	-	75.12	234Th method	Buesseler et al. (1998)
86	-	63.06	-46.01	1999	100	-	-	30.36	234Th method	Coppola et al. (2005)
87	-	63.11	-45.66	1999	100	-	-	12.12	234Th method	Coppola et al. (2005)
88	-	63.08	-45.19	1999	100	-	-	27	234Th method	Coppola et al. (2005)
89	-	62.88	-44.84	1999	100	-	-	1.2	234Th method	Coppola et al. (2005)
90	-	62.53	-44.33	1999	100	-	-	3	234Th method	Coppola et al. (2005)
91	-	63.73	-44.07	1999	100	-	-	11.52	234Th method	Coppola et al. (2005)
92	-	64.73	-44.01	1999	100	-	-	11.88	234Th method	Coppola et al. (2005)
93	-	63.08	-42.91	1999	100	-	-	11.28	234Th method	Coppola et al. (2005)
94	-	-43	47.02	2004	100	-	-	278.4	234Th method	Morris et al. (2007)
95	-	-43.12	47.18	2004	100	-	-	200.4	234Th method	Morris et al. (2007)
96	-	-45.5	48.99	2004	100	-	-	163.2	234Th method	Morris et al. (2007)
97	-	-44.87	49.65	2004	100	-	-	163.2	234Th method	Morris et al. (2007)
98	-	-44.95	49.94	2004	100	-	-	183.6	234Th method	Morris et al. (2007)
99	-	-44.52	49.99	2004	100	-	-	135.6	234Th method	Morris et al. (2007)
100	-	-43.93	50.26	2004	100	-	-	225.6	234Th method	Morris et al. (2007)
101	-	-49.02	51.47	2004	100	-	-	69.6	234Th method	Morris et al. (2007)
102	-	-49	51.54	2004	100	-	-	172.8	234Th method	Morris et al. (2007)
103	-	-46.07	51.77	2004	100	-	-	139.2	234Th method	Morris et al. (2007)
104	-	-46.08	51.78	2004	100	-	-	240	234Th method	Morris et al. (2007)
105	-	-46.06	51.78	2004	100	-	-	187.2	234Th method	Morris et al. (2007)
106	-	-46.06	51.79	2004	100	-	-	162	234Th method	Morris et al. (2007)
107	-	-46.04	51.8	2004	100	-	-	58.8	234Th method	Morris et al. (2007)
108	-	-46.14	51.86	2004	100	-	-	165.6	234Th method	Morris et al. (2007)
109	-	-46.03	51.87	2005	100	-	-	121.2	234Th method	Morris et al. (2007)
110	-	-46.04	51.96	2005	100	-	-	146.4	234Th method	Morris et al. (2007)
111	-	-47.8	52.85	2005	100	-	-	225.6	234Th method	Morris et al. (2007)
112	-	-47.8	52.86	2005	100	-	-	58.8	234Th method	Morris et al. (2007)
113	-	-46	56.15	2005	100	-	-	153.6	234Th method	Morris et al. (2007)
114	-	74	-49.13	2005	100	-	-	75.6	234Th method	Savoye et al. (2004)
115	-	73	-51.5	2005	100	-	-	61.2	234Th method	Savoye et al. (2004)
116	-	74.58	-51.1	2005	100	-	-	66	234Th method	Savoye et al. (2004)
117	-	77	-50.48	2005	100	-	-	51.6	234Th method	Savoye et al. (2004)
118	-	75.6	-52.45	2005	100	-	-	37.2	234Th method	Savoye et al. (2004)
119	-	65	-12	2014	59	3412	3471	88.2	234Th method	Subha Anand et al. (2018)
120	-	66.69	-8.02	2014	56	3675	3731	21	234Th method	Subha Anand et al. (2018)
121	-	67.9	-5.27	2014	65	2866	2931	61.2	234Th method	Subha Anand et al. (2018)
122	-	65	-0.01	2014	95	3542	3637	36.6	234Th method	Subha Anand et al. (2018)
123	-	65	4	2014	69	3408	3477	29.4	234Th method	Subha Anand et al. (2018)
124	-	65	7	2014	72	4461	4533	70.2	234Th method	Subha Anand et al. (2018)
125	-	64.99	13	2014	65	4044	4109	19.8	234Th method	Subha Anand et al. (2018)
126	-	69.06	17.3	2014	85	3204	3289	51	234Th method	Subha Anand et al. (2018)
127	-	-123.152	70.6283	2004	50	499	549	107.4	234Th method	Amiel and Cochran (2008)
128	-	-125.573	70.9133	2004	50	322	372	35.4	234Th method	Amiel and Cochran (2008)
129	-	-126.93	71.4316	2004	50	368	418	34.8	234Th method	Amiel and Cochran (2008)
130	-	-126.112	70.7633	2004	50	187	237	42	234Th method	Amiel and Cochran (2008)
131	-	-125.833	71.125	2004	50	332	382	186.6	234Th method	Amiel and Cochran (2008)
132	-	-134.757	70.95	2004	100	197	297	146.4	234Th method	Amiel and Cochran (2008)
133	-	-135.892	70.6416	2004	100	171	271	170.4	234Th method	Amiel and Cochran (2008)
134	-	-138.597	70.02	2004	50	221	271	129.6	234Th method	Amiel and Cochran (2008)
135	-	33.9667	78.9833	2007	100	183	283	20.4	234Th method	Cai et al. (2010)
136	-	34.05	81	2007	100	123	223	33.6	234Th method	Cai et al. (2010)
137	-	34.0167	81.8667	2007	100	1049	1149	21.6	234Th method	Cai et al. (2010)
138	-	33.9167	82.5	2007	100	3059	3159	12	234Th method	Cai et al. (2010)
139	-	60.4167	83.6333	2007	100	3301	3401	28.8	234Th method	Cai et al. (2010)
140	-	61.8	83.1167	2007	100	2699	2799	12	234Th method	Cai et al. (2010)
141	-	60.7833	82.8	2007	100	789	889	28.8	234Th method	Cai et al. (2010)
142	-	60.7833	82.5	2007	100	233	333	16.8	234Th method	Cai et al. (2010)
143	-	68.95	82.0833	2007	100	509	609	12	234Th method	Cai et al. (2010)
144	-	86.1667	81.2167	2007	100	309	409	13.2	234Th method	Cai et al. (2010)
145	-	86.2833	83.2667	2007	100	2971	3071	25.2	234Th method	Cai et al. (2010)
146	-	139.6	88.1667	2007	100	1183	1283	4.8	234Th method	Cai et al. (2010)
147	-	151.967	86.5	2007	100	1321	1421	14.4	234Th method	Cai et al. (2010)
148	-	119.55	82.1833	2007	100	3977	4077	6	234Th method	Cai et al. (2010)
149	-	123.4	77.3667	2007	100	1031	1131	8.4	234Th method	Cai et al. (2010)
